# Supplementary material for: Quality of Care Indicators for Hospital Physical Therapy Units: A Systematic Review
Source: PubMed Central journal article supplement — Phys Ther. 2021 Nov 20;102(2):pzab261. doi: 10.1093/ptj/pzab261 (PMC8807027; doi:10.1093/ptj/pzab261), 2021-11-20
Supplement: appendix_1-clinical_indicators_for_pt_pzab261.pdf [file appendix_1-clinical_indicators_for_pt_pzab261.pdf]

| Identifier | Reference or indicator source                                                                                                              | Link                                                                                                                      | Short title                                                            | Denominator                                                                                  | Numerator                                                                                                                                                                                                                                                      | Adapted title                                                                                                                                                                                                                                          | Level of evidence | Type of indicator | Category     | Setting/Perspective           | Dimension     |
|------------|--------------------------------------------------------------------------------------------------------------------------------------------|---------------------------------------------------------------------------------------------------------------------------|------------------------------------------------------------------------|----------------------------------------------------------------------------------------------|----------------------------------------------------------------------------------------------------------------------------------------------------------------------------------------------------------------------------------------------------------------|--------------------------------------------------------------------------------------------------------------------------------------------------------------------------------------------------------------------------------------------------------|-------------------|-------------------|--------------|-------------------------------|---------------|
| 1          | Chang JT, Ganz DA. Quality indicators for falls and mobility problems in vulnerable elders. J Am Geriatr Soc. 2007 Oct;55 Suppl 2:S327-34. | <a href="http://doi.wiley.com/10.1111/j.1532-5415.2007.01339.x">http://doi.wiley.com/10.1111/j.1532-5415.2007.01339.x</a> | Detection of Falls                                                     | ALL vulnerable elders                                                                        | Vulnerable elders (VEs) should have documentation that they have been asked annually about the occurrence of recent falls                                                                                                                                      | Percentage of vulnerable elderly patients who have had any recent falls                                                                                                                                                                                | 5                 | Process           | Geriatric CC | Inpatient and ambulatory care | Safety        |
| 2          | Chang JT, Ganz DA. Quality indicators for falls and mobility problems in vulnerable elders. J Am Geriatr Soc. 2007 Oct;55 Suppl 2:S327-34. | <a href="http://doi.wiley.com/10.1111/j.1532-5415.2007.01339.x">http://doi.wiley.com/10.1111/j.1532-5415.2007.01339.x</a> | Basic Fall History (Including Medication Review and Functional Status) | IF a VE reports a history of two or more falls (or 1 fall with injury) in the previous year, | THEN there should be documentation of a basic fall history (circumstances, medications, chronic conditions, mobility, alcohol intake) within 3 months of the report (or within 4 weeks of the report if the most recent fall occurred in the previous 4 weeks) | Percentage of vulnerable elderly people, who have suffered at least 2 falls in the last year (or 1 with injuries), in whom a basic history of falls has been completed (Circumstances, medication, chronic diseases, mobility and alcohol consumption) | 1                 | Process           | Geriatric CC | Inpatient and ambulatory care | Effectiveness |
| 3          | Chang JT, Ganz DA. Quality indicators for falls and mobility problems in vulnerable elders. J Am Geriatr Soc. 2007 Oct;55 Suppl 2:S327-34. | <a href="http://doi.wiley.com/10.1111/j.1532-5415.2007.01339.x">http://doi.wiley.com/10.1111/j.1532-5415.2007.01339.x</a> | Orthostatic Vital Signs                                                | IF a VE reports a history of two or more falls (or 1 fall with injury) in the previous year, | THEN there should be documentation of orthostatic vital signs (blood pressure and pulse) within 3 months of the report (or within 4 weeks of the report if the most recent fall occurred in the previous 4 weeks)                                              | Percentage of vulnerable elderly people who have suffered at least 2 falls in the last year (or 1 with injuries), in whom orthostatic vital signs (blood pressure and pulse) have been recorded                                                        | 1                 | Process           | Geriatric CC | Inpatient and ambulatory care | Effectiveness |
| 4          | Chang JT, Ganz DA. Quality indicators for falls and mobility problems in vulnerable elders. J Am Geriatr Soc. 2007 Oct;55 Suppl 2:S327-34. | <a href="http://doi.wiley.com/10.1111/j.1532-5415.2007.01339.x">http://doi.wiley.com/10.1111/j.1532-5415.2007.01339.x</a> | Gait and Balance Evaluation for Falls and Mobility Disorders           | IF a VE reports a history of two or more falls (or 1 fall with injury) in the previous year, | THEN there should be documentation of a basic gait, balance, and strength evaluation within 3 months of the report (or within 4 weeks of the report if the most recent fall occurred in the previous 4 weeks);                                                 | Percentage of vulnerable elderly people who have suffered at least 2 falls in the last year (or 1 with injuries) in whom an examination of gait, balance and strength has been documented.                                                             | 1                 | Process           | Geriatric CC | Inpatient and ambulatory care | Effectiveness |

|   |                                                                                                                                            |                                                                                                                           |                                                                |                                                                                                                          |                                                                                                                                                                                                                               |                                                                                                                                                                                                                                       |   |         |              |                               |               |
|---|--------------------------------------------------------------------------------------------------------------------------------------------|---------------------------------------------------------------------------------------------------------------------------|----------------------------------------------------------------|--------------------------------------------------------------------------------------------------------------------------|-------------------------------------------------------------------------------------------------------------------------------------------------------------------------------------------------------------------------------|---------------------------------------------------------------------------------------------------------------------------------------------------------------------------------------------------------------------------------------|---|---------|--------------|-------------------------------|---------------|
| 5 | Chang JT, Ganz DA. Quality indicators for falls and mobility problems in vulnerable elders. J Am Geriatr Soc. 2007 Oct;55 Suppl 2:S327-34. | <a href="http://doi.wiley.com/10.1111/j.1532-5415.2007.01339.x">http://doi.wiley.com/10.1111/j.1532-5415.2007.01339.x</a> | Gait and Balance Evaluation for Falls and Mobility Disorders b | IF a VE has new or worsening difficulty with ambulation, balance, or mobility,                                           | THEN there should be documentation of a basic gait, balance, and strength evaluation within 3 months of the report;                                                                                                           | Percentage of vulnerable seniors reporting difficulty or worsening gait, balance, or mobility in which a walk, balance, and strength examination has been documented.                                                                 | 1 | Process | Geriatric CC | Inpatient and ambulatory care | Effectiveness |
| 6 | Chang JT, Ganz DA. Quality indicators for falls and mobility problems in vulnerable elders. J Am Geriatr Soc. 2007 Oct;55 Suppl 2:S327-34. | <a href="http://doi.wiley.com/10.1111/j.1532-5415.2007.01339.x">http://doi.wiley.com/10.1111/j.1532-5415.2007.01339.x</a> | Cognitive Assessment                                           | IF a VE reports a history of two or more falls (or 1 fall with injury) in the previous year,                             | THEN there should be documentation of an assessment of cognitive status in the previous 6 months or within 3 months of the report (or within 4 weeks of the report if the most recent fall occurred in the previous 4 weeks), | Percentage of vulnerable elderly people who have suffered at least 2 falls in the last year (or 1 with injuries) in which an assessment of cognitive status (mini-mental) has been recorded.                                          | 1 | Process | Geriatric CC | Inpatient and ambulatory care | Effectiveness |
| 7 | Chang JT, Ganz DA. Quality indicators for falls and mobility problems in vulnerable elders. J Am Geriatr Soc. 2007 Oct;55 Suppl 2:S327-34. | <a href="http://doi.wiley.com/10.1111/j.1532-5415.2007.01339.x">http://doi.wiley.com/10.1111/j.1532-5415.2007.01339.x</a> | Home Hazard Assessment and Modification                        | IF a VE reports a history of two or more falls (or 1 fall with injury) in the previous year,                             | There should be documentation of an assessment and modification of home hazards recommended in the previous year or within 3 months of the report,                                                                            | Percentage of vulnerable seniors who have suffered at least 2 falls in the past year (or 1 with injuries) in whom a home risk assessment record and recommendations have been completed.                                              | 2 | Process | Geriatric CC | Inpatient and ambulatory care | Effectiveness |
| 8 | Chang JT, Ganz DA. Quality indicators for falls and mobility problems in vulnerable elders. J Am Geriatr Soc. 2007 Oct;55 Suppl 2:S327-34. | <a href="http://doi.wiley.com/10.1111/j.1532-5415.2007.01339.x">http://doi.wiley.com/10.1111/j.1532-5415.2007.01339.x</a> | Assistive Device                                               | IF a VE demonstrates poor balance or proprioception or excessive postural sway and does not have an assistive device,    | THEN an evaluation or prescription for an assistive device should be offered within 3 months,                                                                                                                                 | Percentage of vulnerable elderly who demonstrate poor balance, proprioception, or excessive postural deviation and do not have an assistive device for whom an evaluation and prescription of an assistive device has been completed. | 4 | Process | Geriatric CC | Inpatient and ambulatory care | Effectiveness |
| 9 | Chang JT, Ganz DA. Quality indicators for falls and mobility problems in vulnerable elders. J Am Geriatr Soc. 2007 Oct;55 Suppl 2:S327-34. | <a href="http://doi.wiley.com/10.1111/j.1532-5415.2007.01339.x">http://doi.wiley.com/10.1111/j.1532-5415.2007.01339.x</a> | Assistive Device b                                             | IF a VE reports a history of two or more falls (or 1 fall with injury) in the previous year and has an assistive device, | THEN there should be documentation of an assistive device review in the previous 6 months or within 3 months of the report (or within 4 weeks of the report if the most recent fall occurred in the previous 4 weeks),        | Percentage of vulnerable elderly patients who have suffered at least 2 falls in the last year (or 1 with injuries) who use an assistive device in which a revision of the same has been registered.                                   | 4 | Process | Geriatric CC | Inpatient and ambulatory care | Effectiveness |

|    |                                                                                                                                                                                                                                                                                                                                          |                                                                                                                                                                                                                             |                                                                |                                                                               |                                                                                                                                                      |                                                                                                                                                               |   |         |              |                               |               |
|----|------------------------------------------------------------------------------------------------------------------------------------------------------------------------------------------------------------------------------------------------------------------------------------------------------------------------------------------|-----------------------------------------------------------------------------------------------------------------------------------------------------------------------------------------------------------------------------|----------------------------------------------------------------|-------------------------------------------------------------------------------|------------------------------------------------------------------------------------------------------------------------------------------------------|---------------------------------------------------------------------------------------------------------------------------------------------------------------|---|---------|--------------|-------------------------------|---------------|
| 10 | Chang JT, Ganz DA. Quality indicators for falls and mobility problems in vulnerable elders. J Am Geriatr Soc. 2007 Oct;55 Suppl 2:S327-34.                                                                                                                                                                                               | <a href="http://doi.wiley.com/10.1111/j.1532-5415.2007.01339.x">http://doi.wiley.com/10.1111/j.1532-5415.2007.01339.x</a>                                                                                                   | Exercise Programs                                              | IF a VE is found to have a problem with gait, balance, strength, or endurance | THEN there should be documentation of a structured or supervised exercise program offered in the previous 6 months or within 3 months of the report, | Percentage of vulnerable seniors demonstrating poor gait, balance, strength, or endurance who have been offered a structured and supervised exercise program. | 5 | Process | Geriatric CC | Inpatient and ambulatory care | Effectiveness |
| 11 | Grossman JM, MacLean CH. Quality indicators for the management of osteoporosis in vulnerable elders. Ann Intern Med. 2001 Oct 16;135(8 Pt 2):722-30. PubMed PMID: 11601955.                                                                                                                                                              | <a href="https://annals.org/aim/fullarticle/714865/quality-indicators-management-osteoporosis-vulnerable-elders">https://annals.org/aim/fullarticle/714865/quality-indicators-management-osteoporosis-vulnerable-elders</a> | Exercise Therapy for Patients with a New Osteoporotic Fracture | IF an ambulatory vulnerable elder has an osteoporotic fracture diagnosed      | THEN physical therapy or an exercise program should be offered within 3 months                                                                       | Percentage of vulnerable elderly people with a fracture due to osteoporosis in whom a physiotherapeutic exercise program has been offered.                    | 1 | Process | Geriatric CC | Inpatient and ambulatory care | Effectiveness |
| 12 | Grube MM, Dohle C, Djouchadar D, Rech P, Bienek K, Dietz-Fricke U, Jöbges M, Kohler M, Missala I, Schönherr B, Werner C, Zeytountchian H, Wissel J, Heuschmann PU. Evidence-based quality indicators for stroke rehabilitation. Stroke. 2012 Jan;43(1):142-6. doi: 0.1161/STROKEAHA.111.627679. Epub 2011 Oct 20. PubMed PMID: 22020037. | <a href="https://www.ahajournals.org/doi/pdf/10.1161/STROKEAHA.111.627679">https://www.ahajournals.org/doi/pdf/10.1161/STROKEAHA.111.627679</a>                                                                             | Management to reduce spasticity                                | All stroke patients                                                           | Percentage of patients receiving a standardized assessment for spasticity at admission and before discharge.                                         | Percentage of stroke patients in whom a standardized assessment for spasticity at admission and before discharge has been performed.                          | 5 | Process | Neurology CC | Inpatient and ambulatory care | Effectiveness |

|                                                                                                                                                                                                                                                                                                                                                    |                                                                                                                                                        |                                     |                                                                                        |                                                                                                                                                                                                                                                     |                                                                                                                                  |          |                |                     |                                      |                      |
|----------------------------------------------------------------------------------------------------------------------------------------------------------------------------------------------------------------------------------------------------------------------------------------------------------------------------------------------------|--------------------------------------------------------------------------------------------------------------------------------------------------------|-------------------------------------|----------------------------------------------------------------------------------------|-----------------------------------------------------------------------------------------------------------------------------------------------------------------------------------------------------------------------------------------------------|----------------------------------------------------------------------------------------------------------------------------------|----------|----------------|---------------------|--------------------------------------|----------------------|
| <p>13 Grube MM, Dohle C, Djouchadar D, Rech P, Bienek K, Dietz-Fricke U, Jöbges M, Kohler M, Missala I, Schönherr B, Werner C, Zeytountchian H, Wissel J, Heuschmann PU. Evidence-based quality indicators for stroke rehabilitation. Stroke. 2012 Jan;43(1):142-6. doi: 0.1161/STROKEAHA.111.627679. Epub 2011 Oct 20. PubMed PMID: 22020037.</p> | <p><a href="https://www.ahajournals.org/doi/pdf/10.1161/STROKEAHA.111.627680">https://www.ahajournals.org/doi/pdf/10.1161/STROKEAHA.111.627680</a></p> | <p>Recovery of mobility</p>         | <p>All stroke patients who were immobile at admission</p>                              | <p>Percentage of patients who are able to move at least independently using a wheelchair at discharge (Barthel Index item "Mobility" <math>\geq 5</math>)1 of those patients who were immobile at admission (Barthel Index item "Mobility" = 0)</p> | <p>Percentage of stroke patients immobile on admission who can move independently in a wheelchair at discharge.</p>              | <p>5</p> | <p>Outcome</p> | <p>Neurology CC</p> | <p>Inpatient and ambulatory care</p> | <p>Effectiveness</p> |
| <p>14 Grube MM, Dohle C, Djouchadar D, Rech P, Bienek K, Dietz-Fricke U, Jöbges M, Kohler M, Missala I, Schönherr B, Werner C, Zeytountchian H, Wissel J, Heuschmann PU. Evidence-based quality indicators for stroke rehabilitation. Stroke. 2012 Jan;43(1):142-6. doi: 0.1161/STROKEAHA.111.627679. Epub 2011 Oct 20. PubMed PMID: 22020037.</p> | <p><a href="https://www.ahajournals.org/doi/pdf/10.1161/STROKEAHA.111.627681">https://www.ahajournals.org/doi/pdf/10.1161/STROKEAHA.111.627681</a></p> | <p>Recovery of walking function</p> | <p>All stroke patients who were immobile or dependent on a wheelchair at admission</p> | <p>Percentage of patients who are able to move independently at discharge (Barthel Index item "Mobility" = 15)1 of those patients who were immobile or dependent on a wheelchair at admission (Barthel Index item "Mobility" &lt; 15)</p>           | <p>Percentage of patients with stroke while immobile or in a wheelchair at admission who can move independently at discharge</p> | <p>5</p> | <p>Outcome</p> | <p>Neurology CC</p> | <p>Inpatient and ambulatory care</p> | <p>Effectiveness</p> |

|                                                                                                                                                                                                                                                                                                                                                    |                                                                                                                                                        |                                                   |                                                                                                                       |                                                                                                                                                                                                                      |                                                                                                                                       |                |                     |                                      |                      |
|----------------------------------------------------------------------------------------------------------------------------------------------------------------------------------------------------------------------------------------------------------------------------------------------------------------------------------------------------|--------------------------------------------------------------------------------------------------------------------------------------------------------|---------------------------------------------------|-----------------------------------------------------------------------------------------------------------------------|----------------------------------------------------------------------------------------------------------------------------------------------------------------------------------------------------------------------|---------------------------------------------------------------------------------------------------------------------------------------|----------------|---------------------|--------------------------------------|----------------------|
| <p>15 Grube MM, Dohle C, Djouchadar D, Rech P, Bienek K, Dietz-Fricke U, Jöbges M, Kohler M, Missala I, Schönherr B, Werner C, Zeytountchian H, Wissel J, Heuschmann PU. Evidence-based quality indicators for stroke rehabilitation. Stroke. 2012 Jan;43(1):142-6. doi: 0.1161/STROKEAHA.111.627679. Epub 2011 Oct 20. PubMed PMID: 22020037.</p> | <p><a href="https://www.ahajournals.org/doi/pdf/10.1161/STROKEAHA.111.627682">https://www.ahajournals.org/doi/pdf/10.1161/STROKEAHA.111.627682</a></p> | <p>Recovery of assistive upper limb function</p>  | <p>All stroke patients who could not pick up a ball with both hands so at admission</p>                               | <p>Percentage of patients who can pick up a ball with both hands (item 5 of the arm section of the Rivermead Motor Assessment)2 at discharge of those who could not do so at admission</p>                           | <p>Percentage of stroke patients unable to catch a ball with both hands on admission who are able to discharge.</p> <p>5</p>          | <p>Outcome</p> | <p>Neurology CC</p> | <p>Inpatient and ambulatory care</p> | <p>Effectiveness</p> |
| <p>16 Grube MM, Dohle C, Djouchadar D, Rech P, Bienek K, Dietz-Fricke U, Jöbges M, Kohler M, Missala I, Schönherr B, Werner C, Zeytountchian H, Wissel J, Heuschmann PU. Evidence-based quality indicators for stroke rehabilitation. Stroke. 2012 Jan;43(1):142-6. doi: 0.1161/STROKEAHA.111.627679. Epub 2011 Oct 20. PubMed PMID: 22020037.</p> | <p><a href="https://www.ahajournals.org/doi/pdf/10.1161/STROKEAHA.111.627683">https://www.ahajournals.org/doi/pdf/10.1161/STROKEAHA.111.627683</a></p> | <p>Recovery of functional upper limb function</p> | <p>All stroke patients who could not pick up a piece of paper from a table and release it five times at admission</p> | <p>Percentage of patients who can pick up a piece of paper from a table and release it five times (item 8 of the arm section of the Rivermead Motor Assessment) at discharge of those who could not at admission</p> | <p>Percentage of stroke patients unable to grab and drop a piece of paper 5 times on admission who are able to discharge</p> <p>5</p> | <p>Outcome</p> | <p>Neurology CC</p> | <p>Inpatient and ambulatory care</p> | <p>Effectiveness</p> |

|                                                                                                                                                                                                                                                                                                                                                    |                                                                                                                                                        |                                                                           |                            |                                                                                                                                                                                                                                                                                                                                                       |                                                                                                                                                                                                                                                                                                                          |          |                               |                                      |                      |
|----------------------------------------------------------------------------------------------------------------------------------------------------------------------------------------------------------------------------------------------------------------------------------------------------------------------------------------------------|--------------------------------------------------------------------------------------------------------------------------------------------------------|---------------------------------------------------------------------------|----------------------------|-------------------------------------------------------------------------------------------------------------------------------------------------------------------------------------------------------------------------------------------------------------------------------------------------------------------------------------------------------|--------------------------------------------------------------------------------------------------------------------------------------------------------------------------------------------------------------------------------------------------------------------------------------------------------------------------|----------|-------------------------------|--------------------------------------|----------------------|
| <p>17 Grube MM, Dohle C, Djouchadar D, Rech P, Bienek K, Dietz-Fricke U, Jöbges M, Kohler M, Missala I, Schönherr B, Werner C, Zeytountchian H, Wissel J, Heuschmann PU. Evidence-based quality indicators for stroke rehabilitation. Stroke. 2012 Jan;43(1):142-6. doi: 0.1161/STROKEAHA.111.627679. Epub 2011 Oct 20. PubMed PMID: 22020037.</p> | <p><a href="https://www.ahajournals.org/doi/pdf/10.1161/STROKEAHA.111.627684">https://www.ahajournals.org/doi/pdf/10.1161/STROKEAHA.111.627684</a></p> | <p>Application for/ facilitation of further rehabilitation or therapy</p> | <p>All stroke patients</p> | <p>Percentage of patients who receive at least one of the following four services:<br/> - application for further outpatient rehabilitation<br/> - individual counselling on further rehabilitation<br/> - a list of ambulant therapists close to the patient's residence<br/> - phone contact to the physician responsible for further treatment</p> | <p>Percentage of stroke patients who have received at least 1 of these 4 services (request for additional outpatient rehabilitation, individual counseling for additional rehabilitation, a list of therapists near the patient's residence, telephone contact with the responsible doctor of additional treatment).</p> | <p>5</p> | <p>Process Neurology CC</p>   | <p>Inpatient and ambulatory care</p> | <p>Effectiveness</p> |
| <p>18 Grube MM, Dohle C, Djouchadar D, Rech P, Bienek K, Dietz-Fricke U, Jöbges M, Kohler M, Missala I, Schönherr B, Werner C, Zeytountchian H, Wissel J, Heuschmann PU. Evidence-based quality indicators for stroke rehabilitation. Stroke. 2012 Jan;43(1):142-6. doi: 0.1161/STROKEAHA.111.627679. Epub 2011 Oct 20. PubMed PMID: 22020037.</p> | <p><a href="https://www.ahajournals.org/doi/pdf/10.1161/STROKEAHA.111.627685">https://www.ahajournals.org/doi/pdf/10.1161/STROKEAHA.111.627685</a></p> | <p>Record of complications</p>                                            | <p>All stroke patients</p> | <p>Existence of a written record of complications which covers at least three of the following domains:<br/> - infections<br/> - falls<br/> - pressure ulcers</p>                                                                                                                                                                                     | <p>Percentage of stroke patients in whom complications have been recorded covering at least three of the following areas (infections, falls, pressure ulcers)</p>                                                                                                                                                        | <p>5</p> | <p>Structure Neurology CC</p> | <p>Inpatient and ambulatory care</p> | <p>Effectiveness</p> |

|    |                                                                                                                                                                                                                                                                                                                                                                                |                                                                                                                                                     |                                                                                                                                                                                                         |                                                                                                     |                                                                                                                                                               |   |         |               |                               |               |
|----|--------------------------------------------------------------------------------------------------------------------------------------------------------------------------------------------------------------------------------------------------------------------------------------------------------------------------------------------------------------------------------|-----------------------------------------------------------------------------------------------------------------------------------------------------|---------------------------------------------------------------------------------------------------------------------------------------------------------------------------------------------------------|-----------------------------------------------------------------------------------------------------|---------------------------------------------------------------------------------------------------------------------------------------------------------------|---|---------|---------------|-------------------------------|---------------|
| 19 | <p>María Rosa Güell, Pilar Cejudo, Gema Rodríguez-Trigo, Juan Bautista Gàldiz, Vinyet 74</p> <p>Casolive, Mònica Regueiro, Juan Jose Soler-Cataluña.</p> <p>Estándares de calidad asistencial en rehabilitación respiratoria en pacientes con enfermedad pulmonar crónica. Archivos de bronconeumología. 2012 Vol. 48. Núm. 11: 396-404. DOI: 10.1016/j.arbres.2012.05.009</p> | <p><a href="https://www.archbronconeumol.org">https://www.archbronconeumol.org</a> E1</p> <p><a href="#">/es-pdf-S03002896120020</a></p>            | <p>EPOC Derivación</p> <p>Todo paciente con una disnea de 2 o más puntos de la MRCm a pesar de un tratamiento farmacológico adecuado</p>                                                                | <p>Número de pacientes a los que se les solicita valoración de RR (rehabilitación respiratoria)</p> | <p>Percentage of patients with dyspnea despite adequate pharmacological treatment in whom an assessment of respiratory rehabilitation has been requested.</p> | 1 | Process | Pneumology CC | Inpatient and ambulatory care | Effectiveness |
| 20 | <p>María Rosa Güell, Pilar Cejudo, Gema Rodríguez-Trigo, Juan Bautista Gàldiz, Vinyet 74</p> <p>Casolive, Mònica Regueiro, Juan Jose Soler-Cataluña.</p> <p>Estándares de calidad asistencial en rehabilitación respiratoria en pacientes con enfermedad pulmonar crónica. Archivos de bronconeumología. 2012 Vol. 48. Núm. 11: 396-404. DOI: 10.1016/j.arbres.2012.05.009</p> | <p><a href="https://www.archbronconeumol.org">https://www.archbronconeumol.org</a> Indicación E2</p> <p><a href="#">/es-pdf-S03002896120020</a></p> | <p>Indicación E2</p> <p>Todo paciente con EPOC remitido a una unidad de RR si su BODE es al menos de 3 puntos o la disnea MRCm (escala del Medical Research Council modificada) <math>\geq 2</math></p> | <p>Número de pacientes incluidos en un programa de RR</p>                                           | <p>Percentage of patients with Chronic Obstructive Pulmonary Disease who have been included in a respiratory rehabilitation program.</p>                      | 1 | Process | Pneumology CC | Ambulatory care               | Effectiveness |

|    |                                                                                                                                                                                                                                                                                                                                                                                                                                                                                                                                  |                                        |                                                                                                     |                                                           |                                                                                                                                     |   |         |               |                               |               |
|----|----------------------------------------------------------------------------------------------------------------------------------------------------------------------------------------------------------------------------------------------------------------------------------------------------------------------------------------------------------------------------------------------------------------------------------------------------------------------------------------------------------------------------------|----------------------------------------|-----------------------------------------------------------------------------------------------------|-----------------------------------------------------------|-------------------------------------------------------------------------------------------------------------------------------------|---|---------|---------------|-------------------------------|---------------|
| 21 | <p>Maria Rosa Güell, <a href="https://www.archbronconeumol.org">https://www.archbronconeumol.org</a><br/> Pilar Cejudo, Gema Rodríguez-Trigo, <a href="/es-pdf/S0300289612002074">/es-pdf/S0300289612002074</a><br/> Juan Bautista Gàldiz, Vinyet Casolive, Mònica Regueiro, Juan Jose Soler-Cataluña.</p> <p>Estándares de calidad asistencial en rehabilitación respiratoria en pacientes con enfermedad pulmonar crónica. Archivos de bronconeumología. 2012 Vol. 48. Núm. 11: 396-404. DOI: 10.1016/j.arbres.2012.05.009</p> | ERCDLE3                                | <p>Todo paciente con una disnea de 2 o más puntos de la MRCm a pesar de un tratamiento adecuado</p> | <p>Número de pacientes que reciben RR</p>                 | <p>Percentage of patients with dyspnea despite treatment in which respiratory rehabilitation has been received.</p>                 | 2 | Process | Pneumology CC | Inpatient and ambulatory care | Effectiveness |
| 22 | <p>Maria Rosa Güell, <a href="https://www.archbronconeumol.org">https://www.archbronconeumol.org</a><br/> Pilar Cejudo, Gema Rodríguez-Trigo, <a href="/es-pdf/S0300289612002074">/es-pdf/S0300289612002074</a><br/> Juan Bautista Gàldiz, Vinyet Casolive, Mònica Regueiro, Juan Jose Soler-Cataluña.</p> <p>Estándares de calidad asistencial en rehabilitación respiratoria en pacientes con enfermedad pulmonar crónica. Archivos de bronconeumología. 2012 Vol. 48. Núm. 11: 396-404. DOI: 10.1016/j.arbres.2012.05.009</p> | <p>Enfermedades hipersecretoras E4</p> | <p>Todos los pacientes hipersecretores con fibrosis quística o bronquiectasias</p>                  | <p>Número de pacientes incluidos en un programa de RR</p> | <p>Percentage of hypersecretory patients with cystic fibrosis or bronchiectasis who are included in respiratory rehabilitation.</p> | 1 | Process | Pneumology CC | Ambulatory care               | Effectiveness |



|                                                                                                                                                                                                                                                                                                                                                                  |                                                                                                                                          |                                       |                                                                                         |                                           |                                                                                                                              |          |                |                      |                                      |                      |
|------------------------------------------------------------------------------------------------------------------------------------------------------------------------------------------------------------------------------------------------------------------------------------------------------------------------------------------------------------------|------------------------------------------------------------------------------------------------------------------------------------------|---------------------------------------|-----------------------------------------------------------------------------------------|-------------------------------------------|------------------------------------------------------------------------------------------------------------------------------|----------|----------------|----------------------|--------------------------------------|----------------------|
| <p>23 Maria Rosa Güell, Pilar Cejudo, Gema Rodríguez-Trigo, Juan Bautista Gàldiz, Vinyet Casolive, Mònica Regueiro, Juan Jose Soler-Cataluña. Estándares de calidad asistencial en rehabilitación respiratoria en pacientes con enfermedad pulmonar crónica. Archivos de bronconeumología. 2012 Vol. 48. Núm. 11: 396-404. DOI: 10.1016/j.arbres.2012.05.009</p> | <p><a href="https://www.archbronconeumol.org/es-pdf/S0300289612002074">https://www.archbronconeumol.org/es-pdf/S0300289612002074</a></p> | <p>Enfermedades neuromuscularesE5</p> | <p>Todos los pacientes con enfermedad neuromuscular y tos ineficaz deben recibir RR</p> | <p>Número de pacientes que reciben RR</p> | <p>Percentage of patients with neuromuscular disease and ineffective cough who have received respiratory rehabilitation.</p> | <p>3</p> | <p>Process</p> | <p>Pneumology CC</p> | <p>Inpatient and ambulatory care</p> | <p>Effectiveness</p> |
| <p>24 Maria Rosa Güell, Pilar Cejudo, Gema Rodríguez-Trigo, Juan Bautista Gàldiz, Vinyet Casolive, Mònica Regueiro, Juan Jose Soler-Cataluña. Estándares de calidad asistencial en rehabilitación respiratoria en pacientes con enfermedad pulmonar crónica. Archivos de bronconeumología. 2012 Vol. 48. Núm. 11: 396-404. DOI: 10.1016/j.arbres.2012.05.009</p> | <p><a href="https://www.archbronconeumol.org/es-pdf/S0300289612002074">https://www.archbronconeumol.org/es-pdf/S0300289612002074</a></p> | <p>Cirugía torácicaE6</p>             | <p>Todos los pacientes que precisen cirugía torácica</p>                                | <p>Número de pacientes que reciben RR</p> | <p>Percentage of patients requiring thoracic surgery in whom respiratory rehabilitation has been received.</p>               | <p>3</p> | <p>Process</p> | <p>Pneumology CC</p> | <p>Inpatient and ambulatory care</p> | <p>Effectiveness</p> |

|    |                                                                                                                                                                                                                                                                                                                                                                      |                                                                                                                                          |                                   |                                                        |                                                                                                     |                                                                                                                                                              |   |         |               |                               |        |
|----|----------------------------------------------------------------------------------------------------------------------------------------------------------------------------------------------------------------------------------------------------------------------------------------------------------------------------------------------------------------------|------------------------------------------------------------------------------------------------------------------------------------------|-----------------------------------|--------------------------------------------------------|-----------------------------------------------------------------------------------------------------|--------------------------------------------------------------------------------------------------------------------------------------------------------------|---|---------|---------------|-------------------------------|--------|
| 25 | <p>María Rosa Güell, Pilar Cejudo, Gema Rodríguez-Trigo, Juan Bautista Gàldiz, Vinyet Casolive, Mònica Regueiro, Juan Jose Soler-Cataluña.</p> <p>Estándares de calidad asistencial en rehabilitación respiratoria en pacientes con enfermedad pulmonar crónica. Archivos de bronconeumología. 2012 Vol. 48. Núm. 11: 396-404. DOI: 10.1016/j.arbres.2012.05.009</p> | <p><a href="https://www.archbronconeumol.org/es-pdf/S0300289612002074">https://www.archbronconeumol.org/es-pdf/S0300289612002074</a></p> | <p>Derivación del pacienteE7</p>  | <p>Número de pacientes remitidos a RR</p>              | <p>Número de pacientes remitidos con documento firmado y completado por el médico de referencia</p> | <p>Percentage of patients referred to respiratory rehabilitation in which a document signed and completed by the referring physician has been presented.</p> | 5 | Process | Pneumology CC | Inpatient and ambulatory care | Safety |
| 26 | <p>María Rosa Güell, Pilar Cejudo, Gema Rodríguez-Trigo, Juan Bautista Gàldiz, Vinyet Casolive, Mònica Regueiro, Juan Jose Soler-Cataluña.</p> <p>Estándares de calidad asistencial en rehabilitación respiratoria en pacientes con enfermedad pulmonar crónica. Archivos de bronconeumología. 2012 Vol. 48. Núm. 11: 396-404. DOI: 10.1016/j.arbres.2012.05.009</p> | <p><a href="https://www.archbronconeumol.org/es-pdf/S0300289612002074">https://www.archbronconeumol.org/es-pdf/S0300289612002074</a></p> | <p>Consentimiento informadoE8</p> | <p>Número de pacientes remitidos al programa de RR</p> | <p>Número de pacientes que firman el consentimiento informado</p>                                   | <p>Percentage of patients referred to the respiratory rehabilitation program who have signed the informed consent.</p>                                       | 5 | Process | Pneumology CC | Inpatient and ambulatory care | Safety |

|    |                                                                                                                                                                                                                                                                                                                                                                      |                                                                                                                                          |                                      |                                                                       |                                                                                                                                                                                                         |                                                                                                                                                                                                                                                          |   |         |               |                               |               |
|----|----------------------------------------------------------------------------------------------------------------------------------------------------------------------------------------------------------------------------------------------------------------------------------------------------------------------------------------------------------------------|------------------------------------------------------------------------------------------------------------------------------------------|--------------------------------------|-----------------------------------------------------------------------|---------------------------------------------------------------------------------------------------------------------------------------------------------------------------------------------------------|----------------------------------------------------------------------------------------------------------------------------------------------------------------------------------------------------------------------------------------------------------|---|---------|---------------|-------------------------------|---------------|
| 27 | <p>María Rosa Güell, Pilar Cejudo, Gema Rodríguez-Trigo, Juan Bautista Gàldiz, Vinyet Casolive, Mònica Regueiro, Juan Jose Soler-Cataluña.</p> <p>Estándares de calidad asistencial en rehabilitación respiratoria en pacientes con enfermedad pulmonar crónica. Archivos de bronconeumología. 2012 Vol. 48. Núm. 11: 396-404. DOI: 10.1016/j.arbres.2012.05.009</p> | <p><a href="https://www.archbronconeumol.org/es-pdf/S0300289612002074">https://www.archbronconeumol.org/es-pdf/S0300289612002074</a></p> | <p>Evaluación clínica Inicial E9</p> | <p>Número total de historias clínicas de pacientes remitidos a RR</p> | <p>Número de historias clínicas donde se recoge completamente esta información</p>                                                                                                                      | <p>Percentage of medical records of patients referred to respiratory rehabilitation in which information has been collected, influencing the symptoms (dyspnea, cough and / or expectoration).</p>                                                       | 5 | Process | Pneumology CC | Inpatient and ambulatory care | Effectiveness |
| 28 | <p>María Rosa Güell, Pilar Cejudo, Gema Rodríguez-Trigo, Juan Bautista Gàldiz, Vinyet Casolive, Mònica Regueiro, Juan Jose Soler-Cataluña.</p> <p>Estándares de calidad asistencial en rehabilitación respiratoria en pacientes con enfermedad pulmonar crónica. Archivos de bronconeumología. 2012 Vol. 48. Núm. 11: 396-404. DOI: 10.1016/j.arbres.2012.05.009</p> | <p><a href="https://www.archbronconeumol.org/es-pdf/S0300289612002074">https://www.archbronconeumol.org/es-pdf/S0300289612002074</a></p> | <p>Exploración física E10</p>        | <p>Número total de pacientes remitidos a RR</p>                       | <p>Número de pacientes con exploración física completa incidiendo en: morfología y movilidad del tórax, asimetrías. Ritmo respiratorio. Auscultación respiratoria. Fuerza muscular periférica. SpO2</p> | <p>Percentage of patients referred to respiratory rehabilitation who underwent a complete physical examination (morphology and mobility of the chest, asymmetries. Respiratory rhythm. Respiratory auscultation. Peripheral muscular strength. SpO2)</p> | 5 | Process | Pneumology CC | Inpatient and ambulatory care | Effectiveness |

|    |                                                                                                                                                                                                                                                                                                                                                                      |                                         |                                                                    |                                                                                                                                                                                     |                                                                                                                                                                                                                                                                                                                      |   |         |               |                               |               |
|----|----------------------------------------------------------------------------------------------------------------------------------------------------------------------------------------------------------------------------------------------------------------------------------------------------------------------------------------------------------------------|-----------------------------------------|--------------------------------------------------------------------|-------------------------------------------------------------------------------------------------------------------------------------------------------------------------------------|----------------------------------------------------------------------------------------------------------------------------------------------------------------------------------------------------------------------------------------------------------------------------------------------------------------------|---|---------|---------------|-------------------------------|---------------|
| 29 | <p>María Rosa Güell, Pilar Cejudo, Gema Rodríguez-Trigo, Juan Bautista Gàldiz, Vinyet Casolive, Mònica Regueiro, Juan Jose Soler-Cataluña.</p> <p>Estándares de calidad asistencial en rehabilitación respiratoria en pacientes con enfermedad pulmonar crónica. Archivos de bronconeumología. 2012 Vol. 48. Núm. 11: 396-404. DOI: 10.1016/j.arbres.2012.05.009</p> | <p>Evaluación de la disneaE11</p>       | <p>Número total de pacientes remitidos a RR con disnea en AVDs</p> | <p>Nº pacientes con evaluación de MRCmAl esfuerzo: Borg/EVA</p>                                                                                                                     | <p>Percentage of patients referred to respiratory rehabilitation with dyspnea in activities of daily living who have been evaluated for exertional dyspnea.</p>                                                                                                                                                      | 5 | Process | Pneumology CC | Inpatient and ambulatory care | Effectiveness |
| 30 | <p>María Rosa Güell, Pilar Cejudo, Gema Rodríguez-Trigo, Juan Bautista Gàldiz, Vinyet Casolive, Mònica Regueiro, Juan Jose Soler-Cataluña.</p> <p>Estándares de calidad asistencial en rehabilitación respiratoria en pacientes con enfermedad pulmonar crónica. Archivos de bronconeumología. 2012 Vol. 48. Núm. 11: 396-404. DOI: 10.1016/j.arbres.2012.05.009</p> | <p>Exploraciones complementariasE12</p> | <p>Número total de pacientes remitidos a RR</p>                    | <p>En la primera evaluación se deberán realizar:Radiografía de tóraxECGEspirometría simple+PBDPrueba de 6 minutos marcha+ BORG Evaluación nutricional: IMCEvaluación de la CVRS</p> | <p>Percentage of patients referred to respiratory rehabilitation in whom, in the first evaluation, chest radiography, electrocardiogram, simple spirometry and bronchodilator test, 6-minute walk and BORG, nutritional evaluation with body mass index and evaluation of the Quality of life related to health.</p> | 5 | Process | Pneumology CC | Inpatient and ambulatory care | Effectiveness |

|                                                                                                                                                                                                                                                                                                                                                                     |                                                                                                                                          |                                                           |                                                                                             |                                                                                                                                                                            |                                                                                                                                                                                                                                                                                                                    |          |                |                      |                                      |                      |
|---------------------------------------------------------------------------------------------------------------------------------------------------------------------------------------------------------------------------------------------------------------------------------------------------------------------------------------------------------------------|------------------------------------------------------------------------------------------------------------------------------------------|-----------------------------------------------------------|---------------------------------------------------------------------------------------------|----------------------------------------------------------------------------------------------------------------------------------------------------------------------------|--------------------------------------------------------------------------------------------------------------------------------------------------------------------------------------------------------------------------------------------------------------------------------------------------------------------|----------|----------------|----------------------|--------------------------------------|----------------------|
| <p>31 Maria Rosa Güell, Pilar Cejudo, Gema Rodríguez-Trigo, Juan Bautista Gàldiz, Vinyet 74 Casolive, Mònica Regueiro, Juan Jose Soler-Cataluña. Estándares de calidad asistencial en rehabilitación respiratoria en pacientes con enfermedad pulmonar crónica. Archivos de bronconeumología. 2012 Vol. 48. Núm. 11: 396-404. DOI: 10.1016/j.arbres.2012.05.009</p> | <p><a href="https://www.archbronconeumol.org/es-pdf/S0300289612002074">https://www.archbronconeumol.org/es-pdf/S0300289612002074</a></p> | <p>Exploraciones complementarias (NAAP)E13</p>            | <p>Número total de pacientes remitidos a RR</p>                                             | <p>Pacientes con exploración de Volúmenes, difusión PIM/PEM (Si existe Insuficiencia Respiratoria: gasometría arterial, Prueba de esfuerzo progresiva o Shuttle test )</p> | <p>Percentage of patients referred to respiratory rehabilitation in which a Volume examination, PIM / PEM diffusion (PIM: maximum inspiratory pressure; PEM: maximum expiratory pressure) has been performed.</p>                                                                                                  | <p>5</p> | <p>Process</p> | <p>Pneumology CC</p> | <p>Inpatient and ambulatory care</p> | <p>Effectiveness</p> |
| <p>32 Maria Rosa Güell, Pilar Cejudo, Gema Rodríguez-Trigo, Juan Bautista Gàldiz, Vinyet 74 Casolive, Mònica Regueiro, Juan Jose Soler-Cataluña. Estándares de calidad asistencial en rehabilitación respiratoria en pacientes con enfermedad pulmonar crónica. Archivos de bronconeumología. 2012 Vol. 48. Núm. 11: 396-404. DOI: 10.1016/j.arbres.2012.05.009</p> | <p><a href="https://www.archbronconeumol.org/es-pdf/S0300289612002074">https://www.archbronconeumol.org/es-pdf/S0300289612002074</a></p> | <p>Exploraciones complementariasE. NeuromuscularesE14</p> | <p>Número total de pacientes remitidos a RR y con capacidad para realizar las maniobras</p> | <p>Pacientes con Espirometría PIM/PEM o SNIF/SNEFPFTMIC (Si existe Insuficiencia Respiratoria: gasometría arterial)</p>                                                    | <p>Percentage of patients referred to respiratory rehabilitation with the ability to perform the maneuvers in which PIM / PEM or SNIF / SNEF, PFT, MIC Spirometry examinations (SNIF, SNEF: maximum inspiratory and expiratory nasal pressure; PFT: peak flow with cough; MIC: maximum insufflation capacity).</p> | <p>5</p> | <p>Process</p> | <p>Pneumology CC</p> | <p>Inpatient and ambulatory care</p> | <p>Effectiveness</p> |

|    |                                                                                                                                                                                                                                                                                                                                                                                                                                                                                                                                                                                                  |                                                                          |                                                                                                                               |                                                                                          |                                                                                                                                                                                                                                                                                               |   |         |               |                               |               |
|----|--------------------------------------------------------------------------------------------------------------------------------------------------------------------------------------------------------------------------------------------------------------------------------------------------------------------------------------------------------------------------------------------------------------------------------------------------------------------------------------------------------------------------------------------------------------------------------------------------|--------------------------------------------------------------------------|-------------------------------------------------------------------------------------------------------------------------------|------------------------------------------------------------------------------------------|-----------------------------------------------------------------------------------------------------------------------------------------------------------------------------------------------------------------------------------------------------------------------------------------------|---|---------|---------------|-------------------------------|---------------|
| 33 | <p>María Rosa Güell, <a href="https://www.archbronconeumol.org">https://www.archbronconeumol.org</a><br/> Pilar Cejudo, Gema Rodríguez-Trigo, <a href="#">/es-pdf</a><br/> Juan Bautista <a href="https://doi.org/10.1016/j.arbres.2012.05.009">S0300289612002074</a><br/> Gàldiz, Vinyet <a href="#">74</a><br/> Casolive, Mònica Regueiro, Juan Jose Soler-Cataluña.</p> <p>Estándares de calidad asistencial en rehabilitación respiratoria en pacientes con enfermedad pulmonar crónica. Archivos de bronconeumología. 2012 Vol. 48. Núm. 11: 396-404. DOI: 10.1016/j.arbres.2012.05.009</p> | <p>Evaluación finalE15</p>                                               | <p>Número total de pacientes remitidos a RR</p>                                                                               | <p>Evaluación disnea (MRCm)Prueba de 6 minutos marcha + BORGEvaluación CVRS al alta</p>  | <p>Percentage of patients referred to respiratory rehabilitation in whom the evaluation of dyspnea, 6-minute walk test, BORG and evaluation of quality of life at discharge have been performed.</p>                                                                                          | 5 | Process | Pneumology CC | Inpatient and ambulatory care | Effectiveness |
| 34 | <p>María Rosa Güell, <a href="https://www.archbronconeumol.org">https://www.archbronconeumol.org</a><br/> Pilar Cejudo, Gema Rodríguez-Trigo, <a href="#">/es-pdf</a><br/> Juan Bautista <a href="https://doi.org/10.1016/j.arbres.2012.05.009">S0300289612002074</a><br/> Gàldiz, Vinyet <a href="#">74</a><br/> Casolive, Mònica Regueiro, Juan Jose Soler-Cataluña.</p> <p>Estándares de calidad asistencial en rehabilitación respiratoria en pacientes con enfermedad pulmonar crónica. Archivos de bronconeumología. 2012 Vol. 48. Núm. 11: 396-404. DOI: 10.1016/j.arbres.2012.05.009</p> | <p>Entrenamiento al ejercicio de miembros superiores e inferioresE16</p> | <p>Numero de pacientes incluidos en programa de rr con EPOC, ERCDL, Trasplante de pulmón, cirugía de reducción de volumen</p> | <p>Número de pacientes que reciben entrenamiento de miembros superiores e inferiores</p> | <p>Percentage of patients included in the respiratory rehabilitation program with chronic obstructive pulmonary disease, chronic respiratory diseases with limiting dyspnea, lung transplantation, volume reduction surgery in whom training has been received for upper and lower limbs.</p> | 2 | Process | Pneumology CC | Ambulatory care               | Effectiveness |

|                                                                                                                                                                                                                                                                                                                                                                  |                                                                                                                                          |                                                   |                                                                                                                                                       |                                                                      |                                                                                                                                                                                                                                                                                                                                            |          |                |                      |                                      |                      |
|------------------------------------------------------------------------------------------------------------------------------------------------------------------------------------------------------------------------------------------------------------------------------------------------------------------------------------------------------------------|------------------------------------------------------------------------------------------------------------------------------------------|---------------------------------------------------|-------------------------------------------------------------------------------------------------------------------------------------------------------|----------------------------------------------------------------------|--------------------------------------------------------------------------------------------------------------------------------------------------------------------------------------------------------------------------------------------------------------------------------------------------------------------------------------------|----------|----------------|----------------------|--------------------------------------|----------------------|
| <p>35 Maria Rosa Güell, Pilar Cejudo, Gema Rodríguez-Trigo, Juan Bautista Gàldiz, Vinyet Casolive, Mònica Regueiro, Juan Jose Soler-Cataluña. Estándares de calidad asistencial en rehabilitación respiratoria en pacientes con enfermedad pulmonar crónica. Archivos de bronconeumología. 2012 Vol. 48. Núm. 11: 396-404. DOI: 10.1016/j.arbres.2012.05.009</p> | <p><a href="https://www.archbronconeumol.org/es-pdf/S0300289612002074">https://www.archbronconeumol.org/es-pdf/S0300289612002074</a></p> | <p>Entrenamiento de músculos respiratoriosE17</p> | <p>Pacientes en programa de RR con debilidad de musculatura respiratoria y una de las siguientes: EPOC, bronquiostasias, fibrosis quística, ERCDL</p> | <p>Pacientes que reciben entrenamiento de músculos respiratorios</p> | <p>Percentage of patients included in the respiratory rehabilitation program with weakness of said musculature in one of the following pathologies (chronic obstructive pulmonary disease, bronchiostasis, cystic fibrosis, chronic respiratory diseases with limiting dyspnea) in whom respiratory muscle training has been received.</p> | <p>3</p> | <p>Process</p> | <p>Pneumology CC</p> | <p>Ambulatory care</p>               | <p>Effectiveness</p> |
| <p>36 Maria Rosa Güell, Pilar Cejudo, Gema Rodríguez-Trigo, Juan Bautista Gàldiz, Vinyet Casolive, Mònica Regueiro, Juan Jose Soler-Cataluña. Estándares de calidad asistencial en rehabilitación respiratoria en pacientes con enfermedad pulmonar crónica. Archivos de bronconeumología. 2012 Vol. 48. Núm. 11: 396-404. DOI: 10.1016/j.arbres.2012.05.009</p> | <p><a href="https://www.archbronconeumol.org/es-pdf/S0300289612002074">https://www.archbronconeumol.org/es-pdf/S0300289612002074</a></p> | <p>Técnicas de fisioterapia respiratoriaE18</p>   | <p>Total de pacientes con EPOC, ERCDL, Bronquiostásias, fibrosis quística, enfermedades neuromusculares y cirugía torácica</p>                        | <p>Número de pacientes que reciben fisioterapia respiratoria</p>     | <p>Percentage of patients with Chronic Obstructive Pulmonary Disease, Bronchiostasis, cystic fibrosis, neuromuscular diseases, thoracic surgery, Chronic respiratory diseases with limiting dyspnea in whom respiratory physiotherapy has been received.</p>                                                                               | <p>3</p> | <p>Process</p> | <p>Pneumology CC</p> | <p>Inpatient and ambulatory care</p> | <p>Effectiveness</p> |

|    |                                                                                                                                                                                                                                                                                                                                                                      |                                                                                             |                                                                                                                                                                                                                                                                                                                                                                                                                                                                                                                                                                                                                                                                                    |                                                                                                                                                                                                                                                           |   |         |               |                               |               |
|----|----------------------------------------------------------------------------------------------------------------------------------------------------------------------------------------------------------------------------------------------------------------------------------------------------------------------------------------------------------------------|---------------------------------------------------------------------------------------------|------------------------------------------------------------------------------------------------------------------------------------------------------------------------------------------------------------------------------------------------------------------------------------------------------------------------------------------------------------------------------------------------------------------------------------------------------------------------------------------------------------------------------------------------------------------------------------------------------------------------------------------------------------------------------------|-----------------------------------------------------------------------------------------------------------------------------------------------------------------------------------------------------------------------------------------------------------|---|---------|---------------|-------------------------------|---------------|
| 37 | <p>María Rosa Güell, Pilar Cejudo, Gema Rodríguez-Trigo, Juan Bautista Gàldiz, Vinyet Casolive, Mònica Regueiro, Juan Jose Soler-Cataluña.</p> <p>Estándares de calidad asistencial en rehabilitación respiratoria en pacientes con enfermedad pulmonar crónica. Archivos de bronconeumología. 2012 Vol. 48. Núm. 11: 396-404. DOI: 10.1016/j.arbres.2012.05.009</p> | <p>EducaciónE19</p> <p>Total de paciente en rehabilitación respiratoria</p>                 | <p>Número de pacientes que reciben educación</p>                                                                                                                                                                                                                                                                                                                                                                                                                                                                                                                                                                                                                                   | <p>Percentage of patients in respiratory rehabilitation who have received education.</p>                                                                                                                                                                  | 2 | Process | Pneumology CC | Inpatient and ambulatory care | Effectiveness |
| 38 | <p>María Rosa Güell, Pilar Cejudo, Gema Rodríguez-Trigo, Juan Bautista Gàldiz, Vinyet Casolive, Mònica Regueiro, Juan Jose Soler-Cataluña.</p> <p>Estándares de calidad asistencial en rehabilitación respiratoria en pacientes con enfermedad pulmonar crónica. Archivos de bronconeumología. 2012 Vol. 48. Núm. 11: 396-404. DOI: 10.1016/j.arbres.2012.05.009</p> | <p>Entrenamiento Intensidad Ejercicio aeróbico E21</p> <p>Número de programas evaluados</p> | <p>Número de programas que cumplen:</p> <p>En los ejercicios de piernas, la carga de trabajo se establece en relación al máximo alcanzado en la prueba de esfuerzo (Wmax) y se va incrementando según tolerancia del paciente (progresión del entrenamiento). En general, niveles altos de intensidad, entre el 60-80% del Wmax son más eficaces y son los recomendados, salvo intolerancia del paciente o circunstancias que así lo aconsejen. Un nivel de entrenamiento bajo (&lt; 50% Wmax) también puede ser eficaz</p> <p>En los ejercicios de brazos: se realiza en general con pesas, iniciando con ½ kg en cada brazo e incrementando progresivamente según tolerancia</p> | <p>Percentage of evaluated respiratory rehabilitation programs in which leg exercises have been completed with the established workload in relation to the maximum reached in the stress test and is increasing according to the patient's tolerance.</p> | 1 | Process | Pneumology CC | Inpatient and ambulatory care | Effectiveness |



|                                                                                                                                                                                                                                                                                                                                                                  |                                                                                                                                          |                                                        |                                      |                                                                                                                                                                                                                                                                                                                                                                                   |                                                                                                                                                                                                                                                                                    |          |                                  |                                      |                      |
|------------------------------------------------------------------------------------------------------------------------------------------------------------------------------------------------------------------------------------------------------------------------------------------------------------------------------------------------------------------|------------------------------------------------------------------------------------------------------------------------------------------|--------------------------------------------------------|--------------------------------------|-----------------------------------------------------------------------------------------------------------------------------------------------------------------------------------------------------------------------------------------------------------------------------------------------------------------------------------------------------------------------------------|------------------------------------------------------------------------------------------------------------------------------------------------------------------------------------------------------------------------------------------------------------------------------------|----------|----------------------------------|--------------------------------------|----------------------|
| <p>39 Maria Rosa Güell, Pilar Cejudo, Gema Rodríguez-Trigo, Juan Bautista Gàldiz, Vinyet Casolive, Mònica Regueiro, Juan Jose Soler-Cataluña. Estándares de calidad asistencial en rehabilitación respiratoria en pacientes con enfermedad pulmonar crónica. Archivos de bronconeumología. 2012 Vol. 48. Núm. 11: 396-404. DOI: 10.1016/j.arbres.2012.05.009</p> | <p><a href="https://www.archbronconeumol.org/es-pdf/S0300289612002074">https://www.archbronconeumol.org/es-pdf/S0300289612002074</a></p> | <p>Ejercicio de fuerza E22</p>                         | <p>Número de programas evaluados</p> | <p>Número de programas que realizan entrenamientos con una de las siguientes opciones:<br/>1. Pesos bajos/muchas repeticiones: dirigido a mejorar la resistencia muscular (iniciar con ½ kg en cada brazo e incrementar según tolerancia)<br/>2.Peso alto/pocas repeticiones: dirigido a incrementar la fuerza y masa musculares. Nivel de intensidad superior al 65% del 1RM</p> | <p>Percentage of evaluated respiratory rehabilitation programs in which different options have been performed with low weights and many repetitions (aimed at improving muscular endurance) or high weight and few repetitions (aimed at increasing strength and muscle mass).</p> | <p>5</p> | <p>Process<br/>Pneumology CC</p> | <p>Inpatient and ambulatory care</p> | <p>Effectiveness</p> |
| <p>40 Maria Rosa Güell, Pilar Cejudo, Gema Rodríguez-Trigo, Juan Bautista Gàldiz, Vinyet Casolive, Mònica Regueiro, Juan Jose Soler-Cataluña. Estándares de calidad asistencial en rehabilitación respiratoria en pacientes con enfermedad pulmonar crónica. Archivos de bronconeumología. 2012 Vol. 48. Núm. 11: 396-404. DOI: 10.1016/j.arbres.2012.05.009</p> | <p><a href="https://www.archbronconeumol.org/es-pdf/S0300289612002074">https://www.archbronconeumol.org/es-pdf/S0300289612002074</a></p> | <p>Entrenamiento de los músculos respiratorios E23</p> | <p>Número de programas evaluados</p> | <p>Número de programas en los que La carga de entrenamiento debe establecerse entre el 30-40% de la PIM y/o de la PEM</p>                                                                                                                                                                                                                                                         | <p>Percentage of evaluated respiratory rehabilitation programs in which a training load has been established between 30-40% of the maximum inspiratory pressure and / or the maximum expiratory pressure.</p>                                                                      | <p>2</p> | <p>Process<br/>Pneumology CC</p> | <p>Inpatient and ambulatory care</p> | <p>Effectiveness</p> |

|                                                                                                                                                                                                                                                                                                                                                                     |                                                                                                                                          |                                                        |                                      |                                                                                                                                             |                                                                                                                                                                               |          |                              |                                      |                      |
|---------------------------------------------------------------------------------------------------------------------------------------------------------------------------------------------------------------------------------------------------------------------------------------------------------------------------------------------------------------------|------------------------------------------------------------------------------------------------------------------------------------------|--------------------------------------------------------|--------------------------------------|---------------------------------------------------------------------------------------------------------------------------------------------|-------------------------------------------------------------------------------------------------------------------------------------------------------------------------------|----------|------------------------------|--------------------------------------|----------------------|
| <p>41 Maria Rosa Güell, Pilar Cejudo, Gema Rodríguez-Trigo, Juan Bautista Gàldiz, Vinyet 74 Casolive, Mònica Regueiro, Juan Jose Soler-Cataluña. Estándares de calidad asistencial en rehabilitación respiratoria en pacientes con enfermedad pulmonar crónica. Archivos de bronconeumología. 2012 Vol. 48. Núm. 11: 396-404. DOI: 10.1016/j.arbres.2012.05.009</p> | <p><a href="https://www.archbronconeumol.org/es-pdf/S0300289612002074">https://www.archbronconeumol.org/es-pdf/S0300289612002074</a></p> | <p>Entrenamiento de los músculos respiratorios E23</p> | <p>Número de programas evaluados</p> | <p>Número de programas que incluyen: Técnicas de permeabilización bronquial Técnicas de relajación Técnicas de reeducación respiratoria</p> | <p>Percentage of respiratory rehabilitation programs evaluated in which bronchial permeabilization, relaxation and respiratory reeducation techniques have been included.</p> | <p>3</p> | <p>Process Pneumology CC</p> | <p>Inpatient and ambulatory care</p> | <p>Effectiveness</p> |
| <p>42 Maria Rosa Güell, Pilar Cejudo, Gema Rodríguez-Trigo, Juan Bautista Gàldiz, Vinyet 74 Casolive, Mònica Regueiro, Juan Jose Soler-Cataluña. Estándares de calidad asistencial en rehabilitación respiratoria en pacientes con enfermedad pulmonar crónica. Archivos de bronconeumología. 2012 Vol. 48. Núm. 11: 396-404. DOI: 10.1016/j.arbres.2012.05.009</p> | <p><a href="https://www.archbronconeumol.org/es-pdf/S0300289612002074">https://www.archbronconeumol.org/es-pdf/S0300289612002074</a></p> | <p>duración de la fisioterapia</p>                     | <p>Número de programas evaluados</p> | <p>Número de programas que duran al menos 1 mes</p>                                                                                         | <p>Percentage of evaluated respiratory rehabilitation programs lasting at least 1 month.</p>                                                                                  | <p>3</p> | <p>Process Pneumology CC</p> | <p>Inpatient and ambulatory care</p> | <p>Effectiveness</p> |

|    |                                                                                                                                                                                                                                                                                                                                                                                                                                                                                                                                                                                           |                                                                 |                                      |                                                                                                                                                        |                                                                                                                                                                                                                |   |         |               |                               |               |
|----|-------------------------------------------------------------------------------------------------------------------------------------------------------------------------------------------------------------------------------------------------------------------------------------------------------------------------------------------------------------------------------------------------------------------------------------------------------------------------------------------------------------------------------------------------------------------------------------------|-----------------------------------------------------------------|--------------------------------------|--------------------------------------------------------------------------------------------------------------------------------------------------------|----------------------------------------------------------------------------------------------------------------------------------------------------------------------------------------------------------------|---|---------|---------------|-------------------------------|---------------|
| 43 | <p>María Rosa Güell, <a href="https://www.arch-bronconeumol.org">https://www.arch-bronconeumol.org</a><br/> Pilar Cejudo, Gema Rodríguez-Trigo, <a href="#">/es-pdf</a><br/> Juan Bautista <a href="https://doi.org/10.1016/j.arbres.2012.05.009">S0300289612002074</a><br/> Gàldiz, Vinyet<br/> Casolive, Mònica<br/> Regueiro, Juan Jose<br/> Soler-Cataluña.</p> <p>Estándares de calidad asistencial en rehabilitación respiratoria en pacientes con enfermedad pulmonar crónica. Archivos de bronconeumología. 2012 Vol. 48. Núm. 11: 396-404. DOI: 10.1016/j.arbres.2012.05.009</p> | <p>Duración del entrenamiento general</p>                       | <p>Número de programas evaluados</p> | <p>Número de programas que realizan entrenamiento 8-12 semanas al menos 60 min, incluyendo 20-30 min de ejercicio de brazos y 20-30 min de piernas</p> | <p>Percentage of evaluated respiratory rehabilitation programs in which training has been performed for 8-12 weeks for at least 60 min, including 20-30 min of arm exercise and 20-30 min of leg exercise.</p> | 1 | Process | Pneumology CC | Inpatient and ambulatory care | Effectiveness |
| 44 | <p>María Rosa Güell, <a href="https://www.arch-bronconeumol.org">https://www.arch-bronconeumol.org</a><br/> Pilar Cejudo, Gema Rodríguez-Trigo, <a href="#">/es-pdf</a><br/> Juan Bautista <a href="https://doi.org/10.1016/j.arbres.2012.05.009">S0300289612002074</a><br/> Gàldiz, Vinyet<br/> Casolive, Mònica<br/> Regueiro, Juan Jose<br/> Soler-Cataluña.</p> <p>Estándares de calidad asistencial en rehabilitación respiratoria en pacientes con enfermedad pulmonar crónica. Archivos de bronconeumología. 2012 Vol. 48. Núm. 11: 396-404. DOI: 10.1016/j.arbres.2012.05.009</p> | <p>Duración del entrenamiento de los músculos respiratorios</p> | <p>Número de programas evaluados</p> | <p>Número de programas que entrenan de 8-12 semanas 30 min al día todos los días, en una sola sesión o bien en 2 sesiones de 15 min</p>                | <p>Percentage of evaluated respiratory rehabilitation programs in which they have trained for 8-12 weeks 30 minutes a day, every day, in a single session or in 2 sessions of 15 minutes.</p>                  | 2 | Process | Pneumology CC | Inpatient and ambulatory care | Effectiveness |

|    |                                                                                                                                                                                                                                                                                                                                                                      |                                                                                                                                          |                                    |                                      |                                                                                                          |                                                                                                                                                                  |   |         |               |                               |               |
|----|----------------------------------------------------------------------------------------------------------------------------------------------------------------------------------------------------------------------------------------------------------------------------------------------------------------------------------------------------------------------|------------------------------------------------------------------------------------------------------------------------------------------|------------------------------------|--------------------------------------|----------------------------------------------------------------------------------------------------------|------------------------------------------------------------------------------------------------------------------------------------------------------------------|---|---------|---------------|-------------------------------|---------------|
| 45 | <p>María Rosa Güell, Pilar Cejudo, Gema Rodríguez-Trigo, Juan Bautista Gàldiz, Vinyet Casolive, Mònica Regueiro, Juan Jose Soler-Cataluña.</p> <p>Estándares de calidad asistencial en rehabilitación respiratoria en pacientes con enfermedad pulmonar crónica. Archivos de bronconeumología. 2012 Vol. 48. Núm. 11: 396-404. DOI: 10.1016/j.arbres.2012.05.009</p> | <p><a href="https://www.archbronconeumol.org/es-pdf/S0300289612002074">https://www.archbronconeumol.org/es-pdf/S0300289612002074</a></p> | <p>Frecuencia de fisioterapia</p>  | <p>Número de programas evaluados</p> | <p>Número de programas que realizan 2-3 sesiones semanales de fisioterapia</p>                           | <p>Percentage of evaluated respiratory rehabilitation programs in which 2 to 3 weekly sessions of physical therapy have been carried out</p>                     | 3 | Process | Pneumology CC | Inpatient and ambulatory care | Effectiveness |
| 46 | <p>María Rosa Güell, Pilar Cejudo, Gema Rodríguez-Trigo, Juan Bautista Gàldiz, Vinyet Casolive, Mònica Regueiro, Juan Jose Soler-Cataluña.</p> <p>Estándares de calidad asistencial en rehabilitación respiratoria en pacientes con enfermedad pulmonar crónica. Archivos de bronconeumología. 2012 Vol. 48. Núm. 11: 396-404. DOI: 10.1016/j.arbres.2012.05.009</p> | <p><a href="https://www.archbronconeumol.org/es-pdf/S0300289612002074">https://www.archbronconeumol.org/es-pdf/S0300289612002074</a></p> | <p>Frecuencia de entrenamiento</p> | <p>Número de programas evaluados</p> | <p>Número de programas que realizan entrenamiento un mínimo de 3 sesiones semanales y un máximo de 5</p> | <p>Percentage of evaluated respiratory rehabilitation programs in which training has been carried out for a minimum of 3 weekly sessions and a maximum of 5.</p> | 1 | Process | Pneumology CC | Inpatient and ambulatory care | Effectiveness |

|    |                                                                                                                                                                                                                                                                                                                                                                      |                               |                                                                                          |                                                                                                                          |                                                                                                                                           |   |         |               |                               |               |
|----|----------------------------------------------------------------------------------------------------------------------------------------------------------------------------------------------------------------------------------------------------------------------------------------------------------------------------------------------------------------------|-------------------------------|------------------------------------------------------------------------------------------|--------------------------------------------------------------------------------------------------------------------------|-------------------------------------------------------------------------------------------------------------------------------------------|---|---------|---------------|-------------------------------|---------------|
| 47 | <p>María Rosa Güell, Pilar Cejudo, Gema Rodríguez-Trigo, Juan Bautista Gàldiz, Vinyet Casolive, Mònica Regueiro, Juan Jose Soler-Cataluña.</p> <p>Estándares de calidad asistencial en rehabilitación respiratoria en pacientes con enfermedad pulmonar crónica. Archivos de bronconeumología. 2012 Vol. 48. Núm. 11: 396-404. DOI: 10.1016/j.arbres.2012.05.009</p> | <p>Ubicación de programas</p> | <p>Número de pacientes en los que está indicado un programa de atención domiciliaria</p> | <p>Número de pacientes en programas domiciliarios</p>                                                                    | <p>Percentage of respiratory rehabilitation patients in whom a home care program has been indicated.</p>                                  | 1 | Process | Pneumology CC | Inpatient and ambulatory care | Effectiveness |
| 48 | <p>María Rosa Güell, Pilar Cejudo, Gema Rodríguez-Trigo, Juan Bautista Gàldiz, Vinyet Casolive, Mònica Regueiro, Juan Jose Soler-Cataluña.</p> <p>Estándares de calidad asistencial en rehabilitación respiratoria en pacientes con enfermedad pulmonar crónica. Archivos de bronconeumología. 2012 Vol. 48. Núm. 11: 396-404. DOI: 10.1016/j.arbres.2012.05.009</p> | <p>Mantenimiento</p>          | <p>Número de pacientes que han realizado un programa Rehabilitación respiratoria</p>     | <p>Número pacientes a los que se le ha hecho de continuar con un plan de ejercicios en el domicilio la recomendación</p> | <p>Percentage of patients who have undergone a respiratory rehabilitation program in which a home exercise plan has been recommended.</p> | 3 | Process | Pneumology CC | Inpatient and ambulatory care | Effectiveness |

|                                                                                                                                                                                                                                                                                     |                                                                                                                                                                                                               |                                                                                                                                         |                                                                                                                                                                     |                                                                                                                                                                                                                                        |          |                                |                                      |                      |
|-------------------------------------------------------------------------------------------------------------------------------------------------------------------------------------------------------------------------------------------------------------------------------------|---------------------------------------------------------------------------------------------------------------------------------------------------------------------------------------------------------------|-----------------------------------------------------------------------------------------------------------------------------------------|---------------------------------------------------------------------------------------------------------------------------------------------------------------------|----------------------------------------------------------------------------------------------------------------------------------------------------------------------------------------------------------------------------------------|----------|--------------------------------|--------------------------------------|----------------------|
| <p>49 Khanna D, Arnold EL, Pencharz JN, Grossman JM, Traina SB, Lal A, MacLean CH. Measuring process of arthritis care: the Arthritis Foundation's quality indicator set for rheumatoid arthritis. Semin Arthritis Rheum. 2006 Feb;35(4):211-37. Review. PubMed PMID: 16461068.</p> | <p><a href="https://www.scienceirect.com/science/article/abs/pii/S0049017205001617?via%3Dihub">https://www.scienceirect.com/science/article/abs/pii/S0049017205001617?via%3Dihub</a> Quality Indicator 12</p> | <p>IF a patient has a diagnosis of RA and has no contraindications to exercise and is physically and mentally able to exercise</p>      | <p>THEN a directed or supervised muscle strengthening or aerobic exercise program should have been prescribed at least once and reviewed at least once per year</p> | <p>Percentage of patients with rheumatoid arthritis, physically and mentally able to carry out exercise, without contraindications in which a supervised aerobic or strength exercise program has been prescribed at least 1 time.</p> | <p>1</p> | <p>Process Rheumatology CC</p> | <p>Ambulatory care</p>               | <p>Effectiveness</p> |
| <p>50 Khanna D, Arnold EL, Pencharz JN, Grossman JM, Traina SB, Lal A, MacLean CH. Measuring process of arthritis care: the Arthritis Foundation's quality indicator set for rheumatoid arthritis. Semin Arthritis Rheum. 2006 Feb;35(4):211-37. Review. PubMed PMID: 16461068.</p> | <p><a href="https://www.scienceirect.com/science/article/abs/pii/S0049017205001617?via%3Dihub">https://www.scienceirect.com/science/article/abs/pii/S0049017205001617?via%3Dihub</a> Quality Indicator 13</p> | <p>IF a patient has a diagnosis of RA and reports having difficulty with walking because of either stiffness, pain, or instability,</p> | <p>THEN patient's walking ability should be assessed for need for ambulatory assistive devices including a cane, insoles, and orthotics</p>                         | <p>Percentage of patients with rheumatoid arthritis and difficulty walking (due to stiffness, pain, or instability) in whom the need for healthcare devices (cane, insoles, and orthotics) has been evaluated.</p>                     | <p>1</p> | <p>Process Rheumatology CC</p> | <p>Inpatient and ambulatory care</p> | <p>Effectiveness</p> |

|                                                                                                                                                                                                                                                                                     |                                                                                                                                                                                                                 |                                                                                                                                                                         |                                                                                                                                                    |                                                                                                                                                                                                                                                   |          |                |                        |                                      |                      |
|-------------------------------------------------------------------------------------------------------------------------------------------------------------------------------------------------------------------------------------------------------------------------------------|-----------------------------------------------------------------------------------------------------------------------------------------------------------------------------------------------------------------|-------------------------------------------------------------------------------------------------------------------------------------------------------------------------|----------------------------------------------------------------------------------------------------------------------------------------------------|---------------------------------------------------------------------------------------------------------------------------------------------------------------------------------------------------------------------------------------------------|----------|----------------|------------------------|--------------------------------------|----------------------|
| <p>51 Khanna D, Arnold EL, Pencharz JN, Grossman JM, Traina SB, Lal A, MacLean CH. Measuring process of arthritis care: the Arthritis Foundation's quality indicator set for rheumatoid arthritis. Semin Arthritis Rheum. 2006 Feb;35(4):211-37. Review. PubMed PMID: 16461068.</p> | <p><a href="https://www.sciencedirect.com/science/article/abs/pii/S0049017205001617?via%3Dihub">https://www.sciencedirect.com/science/article/abs/pii/S0049017205001617?via%3Dihub</a> Quality Indicator 14</p> | <p>IF a patient has a diagnosis of RA and reports having difficulties with activities of daily living because of either stiffness or pain,</p>                          | <p>THEN the patient's functional ability with the compliant tasks should be assessed for need of assistive devices to aid with compliant tasks</p> | <p>Percentage of patients with rheumatoid arthritis and difficulty in activities of daily living due to stiffness or pain, in whom the functional capacity of the affected tasks has been evaluated to define the need for assistive devices.</p> | <p>2</p> | <p>Process</p> | <p>Rheumatology CC</p> | <p>Inpatient and ambulatory care</p> | <p>Effectiveness</p> |
| <p>52 Khanna D, Arnold EL, Pencharz JN, Grossman JM, Traina SB, Lal A, MacLean CH. Measuring process of arthritis care: the Arthritis Foundation's quality indicator set for rheumatoid arthritis. Semin Arthritis Rheum. 2006 Feb;35(4):211-37. Review. PubMed PMID: 16461068.</p> | <p><a href="https://www.sciencedirect.com/science/article/abs/pii/S0049017205001617?via%3Dihub">https://www.sciencedirect.com/science/article/abs/pii/S0049017205001617?via%3Dihub</a> Quality Indicator 15</p> | <p>IF a patient has a diagnosis of RA and reports having difficulties performing tasks involving use of their hands and wrists because of either stiffness or pain,</p> | <p>THEN the patient's functional ability with their hands and wrists should be assessed for need of hand or wrist splints (orthoses)</p>           | <p>Percentage of patient with rheumatoid arthritis and difficulty performing tasks using hands and wrists due to stiffness or pain in which the functional capacity to define the need for splints has been evaluated.</p>                        | <p>1</p> | <p>Process</p> | <p>Rheumatology CC</p> | <p>Inpatient and ambulatory care</p> | <p>Effectiveness</p> |

|                                                                                                                                                                                                                                                                                                                 |                                                                                                                                                                        |                                                |                                                                                                  |                                                                                                                 |                                                                                                                        |                |                     |                                      |                      |
|-----------------------------------------------------------------------------------------------------------------------------------------------------------------------------------------------------------------------------------------------------------------------------------------------------------------|------------------------------------------------------------------------------------------------------------------------------------------------------------------------|------------------------------------------------|--------------------------------------------------------------------------------------------------|-----------------------------------------------------------------------------------------------------------------|------------------------------------------------------------------------------------------------------------------------|----------------|---------------------|--------------------------------------|----------------------|
| <p>53 Livingstone, I., Hefele, J.G., Nadash, P., Barch, D., &amp; Leland, N.E. (2019). The Relationship Between Quality of Care, Physical Therapy, and Occupational Therapy Staffing Levels in Nursing Homes in 4 Years' Follow-up. Journal of the American Medical Directors Association, 20(4), 462-469 .</p> | <p><a href="https://www.jamda.com/article/S1525-8610(19)30228-2/fulltext">https://www.jamda.com/article/S1525-8610(19)30228-2/fulltext</a></p>                         | <p>National Quality Forum (NQF) (NQF 0674)</p> | <p>The percentage of long-term care residents experiencing 1 or more falls with major injury</p> | <p>Pacientes hospitalizados</p>                                                                                 | <p>Percentage of hospitalized 5 patients who have experienced 1 or more falls with serious injuries.</p>               | <p>Outcome</p> | <p>Geriatric CC</p> | <p>Inpatient care</p>                | <p>Safety</p>        |
| <p>54 MacLean CH, Pencharz JN, Saag KG. Quality indicators for the care of osteoarthritis in vulnerable elders. J Am Geriatr Soc. 2007 Oct;55 Suppl 2:S383-91. Review. PubMed PMID: 17910561.</p>                                                                                                               | <p><a href="https://onlinelibrary.wiley.com/doi/abs/10.1111/j.1532-5415.2007.01346.x">https://onlinelibrary.wiley.com/doi/abs/10.1111/j.1532-5415.2007.01346.x</a></p> | <p>Weight Loss</p>                             | <p>IF a vulnerable elder (VE) is obese (body mass index (BMI) 30 kg/m2),</p>                     | <p>THEN he or she should be advised annually to lose weight,</p>                                                | <p>Percentage of vulnerable 4 obese elderly people who have been advised to lose weight.</p>                           | <p>Process</p> | <p>Geriatric CC</p> | <p>Inpatient and ambulatory care</p> | <p>Effectiveness</p> |
| <p>55 MacLean CH, Pencharz JN, Saag KG. Quality indicators for the care of osteoarthritis in vulnerable elders. J Am Geriatr Soc. 2007 Oct;55 Suppl 2:S383-91. Review. PubMed PMID: 17910561.</p>                                                                                                               | <p><a href="https://onlinelibrary.wiley.com/doi/abs/10.1111/j.1532-5415.2007.01346.x">https://onlinelibrary.wiley.com/doi/abs/10.1111/j.1532-5415.2007.01346.x</a></p> | <p>Pain and Functional Assessment 1</p>        | <p>A VE has symptomatic OA of the knee or hip,</p>                                               | <p>THEN pain should be assessed when new to a primary care or musculoskeletal disease practice and annually</p> | <p>Percentage of vulnerable 5 elderly with symptomatic knee or hip osteoarthritis in whom pain has been evaluated.</p> | <p>Process</p> | <p>Geriatric CC</p> | <p>Inpatient and ambulatory care</p> | <p>Effectiveness</p> |



|                                                                                                                                                                                                   |                                                                                                                                                                                                                |                                                                                                                                                                  |                                                                                                                                             |                                                                                                                                                                                                                                    |          |                |                     |                                      |                      |
|---------------------------------------------------------------------------------------------------------------------------------------------------------------------------------------------------|----------------------------------------------------------------------------------------------------------------------------------------------------------------------------------------------------------------|------------------------------------------------------------------------------------------------------------------------------------------------------------------|---------------------------------------------------------------------------------------------------------------------------------------------|------------------------------------------------------------------------------------------------------------------------------------------------------------------------------------------------------------------------------------|----------|----------------|---------------------|--------------------------------------|----------------------|
| <p>56 MacLean CH, Pencharz JN, Saag KG. Quality indicators for the care of osteoarthritis in vulnerable elders. J Am Geriatr Soc. 2007 Oct;55 Suppl 2:S383-91. Review. PubMed PMID: 17910561.</p> | <p><a href="https://onlinelibrary.wiley.com/doi/abs/10.1111/j.1532-5415.2007.01346.x">https://onlinelibrary.wiley.com/doi/abs/10.1111/j.1532-5415.2007.01346.x</a></p> <p>Pain and Functional Assessment 2</p> | <p>IF a VE has symptomatic OA of the knee or hip,</p>                                                                                                            | <p>THEN functional status should be assessed when new to a primary care or musculoskeletal disease practice and annually,</p>               | <p>Percentage of vulnerable elderly with symptomatic osteoarthritis of the knee or hip in whom functional status has been evaluated.</p>                                                                                           | <p>5</p> | <p>Process</p> | <p>Geriatric CC</p> | <p>Inpatient and ambulatory care</p> | <p>Effectiveness</p> |
| <p>57 MacLean CH, Pencharz JN, Saag KG. Quality indicators for the care of osteoarthritis in vulnerable elders. J Am Geriatr Soc. 2007 Oct;55 Suppl 2:S383-91. Review. PubMed PMID: 17910561.</p> | <p><a href="https://onlinelibrary.wiley.com/doi/abs/10.1111/j.1532-5415.2007.01346.x">https://onlinelibrary.wiley.com/doi/abs/10.1111/j.1532-5415.2007.01346.x</a></p> <p>Exercise Therapy</p>                 | <p>IF an ambulatory VE has symptomatic OA of the knee or hip for longer than 3 months and is able to exercise,</p>                                               | <p>THEN a directed or supervised muscle strengthening or aerobic exercise program should be recommended and activity reviewed annually,</p> | <p>Percentage of vulnerable elderly with symptomatic knee or hip osteoarthritis from 3 months and able to exercise in which a directed or supervised program of muscle strengthening or aerobic exercise has been recommended.</p> | <p>1</p> | <p>Process</p> | <p>Geriatric CC</p> | <p>Ambulatory care</p>               | <p>Effectiveness</p> |
| <p>58 MacLean CH, Pencharz JN, Saag KG. Quality indicators for the care of osteoarthritis in vulnerable elders. J Am Geriatr Soc. 2007 Oct;55 Suppl 2:S383-91. Review. PubMed PMID: 17910561.</p> | <p><a href="https://onlinelibrary.wiley.com/doi/abs/10.1111/j.1532-5415.2007.01346.x">https://onlinelibrary.wiley.com/doi/abs/10.1111/j.1532-5415.2007.01346.x</a></p> <p>Assistive Devices</p>                | <p>IF a VE has symptomatic OA of the hip or knee and has difficulty walking that makes activities of daily living (ADLs) difficult for longer than 3 months,</p> | <p>THEN the need for ambulatory assistive devices should be assessed,</p>                                                                   | <p>Percentage of vulnerable elderly with symptomatic knee or hip osteoarthritis and difficulty walking (limits activities of daily living) in whom the need for assistive devices has been evaluated.</p>                          | <p>4</p> | <p>Process</p> | <p>Geriatric CC</p> | <p>Inpatient and ambulatory care</p> | <p>Effectiveness</p> |

|                                                                                                                                                                                                                                                                             |                                         |                                                                    |                                                                                                               |                                                                                                                                                       |          |                |                           |                        |                      |
|-----------------------------------------------------------------------------------------------------------------------------------------------------------------------------------------------------------------------------------------------------------------------------|-----------------------------------------|--------------------------------------------------------------------|---------------------------------------------------------------------------------------------------------------|-------------------------------------------------------------------------------------------------------------------------------------------------------|----------|----------------|---------------------------|------------------------|----------------------|
| <p>59 Minaya-Muñoz F, Medina-Mirapeix F, Valera-Garrido F. Quality measures for the care of patients with lateral epicondylalgia. BMC Musculoskelet Disord. 2013 Oct 30;14:310. doi: 10.1186/1471-2474-14-310. PubMed PMID: 24172311; PubMed Central PMCID: PMC3816543.</p> | <p>Physical Examination</p>             | <p>IF a patient begins a treatment for lateral epicondylalgia,</p> | <p>THEN evidence that the affected tendon was examined should be documented (at least orthopaedic tests).</p> | <p>Percentage of patients starting treatment for lateral epicondylitis in whom the affected tendon has been examined (at least orthopedic tests).</p> | <p>3</p> | <p>Process</p> | <p>Musculoskeletal CC</p> | <p>Ambulatory care</p> | <p>Effectiveness</p> |
| <p>60 Minaya-Muñoz F, Medina-Mirapeix F, Valera-Garrido F. Quality measures for the care of patients with lateral epicondylalgia. BMC Musculoskelet Disord. 2013 Oct 30;14:310. doi: 10.1186/1471-2474-14-310. PubMed PMID: 24172311; PubMed Central PMCID: PMC3816543.</p> | <p>Pain and functional assessment A</p> | <p>IF a patient has symptomatic lateral epicondylalgia,</p>        | <p>THEN functional status should be assessed upon initiation of a new treatment at least once.</p>            | <p>Percentage of patients with symptomatic lateral epicondylitis in whom pain has been evaluated at the start of a new treatment.</p>                 | <p>3</p> | <p>Process</p> | <p>Musculoskeletal CC</p> | <p>Ambulatory care</p> | <p>Effectiveness</p> |

|                                                                                                                                                                                                                                                                             |                                                                                                                                                                   |                                                             |                                                                                                                                        |                                                                                                                                                   |          |                |                           |                        |                      |
|-----------------------------------------------------------------------------------------------------------------------------------------------------------------------------------------------------------------------------------------------------------------------------|-------------------------------------------------------------------------------------------------------------------------------------------------------------------|-------------------------------------------------------------|----------------------------------------------------------------------------------------------------------------------------------------|---------------------------------------------------------------------------------------------------------------------------------------------------|----------|----------------|---------------------------|------------------------|----------------------|
| <p>61 Minaya-Muñoz F, Medina-Mirapeix F, Valera-Garrido F. Quality measures for the care of patients with lateral epicondylalgia. BMC Musculoskelet Disord. 2013 Oct 30;14:310. doi: 10.1186/1471-2474-14-310. PubMed PMID: 24172311; PubMed Central PMCID: PMC3816543.</p> | <p><a href="https://www.ncbi.nlm.nih.gov/pmc/articles/PMC3816543/">https://www.ncbi.nlm.nih.gov/pmc/articles/PMC3816543/</a> Pain and functional assessment B</p> | <p>IF a patient has symptomatic lateral epicondylalgia,</p> | <p>THEN functional status should be assessed upon initiation of a new treatment at least once.</p>                                     | <p>Percentage of patients with symptomatic lateral epicondylitis in whom functional status has been assessed at the start of a new treatment.</p> | <p>3</p> | <p>Process</p> | <p>Musculoskeletal CC</p> | <p>Ambulatory care</p> | <p>Effectiveness</p> |
| <p>62 Minaya-Muñoz F, Medina-Mirapeix F, Valera-Garrido F. Quality measures for the care of patients with lateral epicondylalgia. BMC Musculoskelet Disord. 2013 Oct 30;14:310. doi: 10.1186/1471-2474-14-310. PubMed PMID: 24172311; PubMed Central PMCID: PMC3816543.</p> | <p><a href="https://www.ncbi.nlm.nih.gov/pmc/articles/PMC3816543/">https://www.ncbi.nlm.nih.gov/pmc/articles/PMC3816543/</a> Education</p>                        | <p>IF a patient has symptomatic lateral epicondylalgia,</p> | <p>THEN education about self-management of risk factors (repetitive movements, etc.) should be given or recommended at least once.</p> | <p>Percentage of patients with symptomatic lateral epicondylitis in whom education on risk factors has been recommended.</p>                      | <p>1</p> | <p>Process</p> | <p>Musculoskeletal CC</p> | <p>Ambulatory care</p> | <p>Effectiveness</p> |

|                                                                                                                                                                                                                                                                             |                                                                                                                                                                |                                                                                                                                                                                                              |                                                                                                                                                               |          |                |                           |                        |                      |
|-----------------------------------------------------------------------------------------------------------------------------------------------------------------------------------------------------------------------------------------------------------------------------|----------------------------------------------------------------------------------------------------------------------------------------------------------------|--------------------------------------------------------------------------------------------------------------------------------------------------------------------------------------------------------------|---------------------------------------------------------------------------------------------------------------------------------------------------------------|----------|----------------|---------------------------|------------------------|----------------------|
| <p>63 Minaya-Muñoz F, Medina-Mirapeix F, Valera-Garrido F. Quality measures for the care of patients with lateral epicondylalgia. BMC Musculoskelet Disord. 2013 Oct 30;14:310. doi: 10.1186/1471-2474-14-310. PubMed PMID: 24172311; PubMed Central PMCID: PMC3816543.</p> | <p><a href="https://www.ncbi.nlm.nih.gov/pmc/articles/PMC3816543/">https://www.ncbi.nlm.nih.gov/pmc/articles/PMC3816543/</a> Physical therapy First line A</p> | <p>IF a patient is started on physical therapy to treat lateral epicondylalgia, THEN a program of exercise therapy (training epicondyle muscles eccentrically and concentrically) should be tried first.</p> | <p>Percentage of patients who begin physical therapy to treat lateral epicondylitis in whom treatment with concentric and eccentric exercises is started.</p> | <p>1</p> | <p>Process</p> | <p>Musculoskeletal CC</p> | <p>Ambulatory care</p> | <p>Effectiveness</p> |
| <p>64 Minaya-Muñoz F, Medina-Mirapeix F, Valera-Garrido F. Quality measures for the care of patients with lateral epicondylalgia. BMC Musculoskelet Disord. 2013 Oct 30;14:310. doi: 10.1186/1471-2474-14-310. PubMed PMID: 24172311; PubMed Central PMCID: PMC3816543.</p> | <p><a href="https://www.ncbi.nlm.nih.gov/pmc/articles/PMC3816543/">https://www.ncbi.nlm.nih.gov/pmc/articles/PMC3816543/</a> Physical therapy First line B</p> | <p>IF a patient is started on physical therapy to treat lateral epicondylalgia, THEN manual therapy by mobilization with movement should be tried first.</p>                                                 | <p>Percentage of patients who begin physical therapy to treat lateral epicondylitis in whom treatment is started by mobilizing with movement.</p>             | <p>1</p> | <p>Process</p> | <p>Musculoskeletal CC</p> | <p>Ambulatory care</p> | <p>Effectiveness</p> |

|                                                                                                                                                                                                                                                                             |                                                                                                                                                                |                                                                                                                               |                                                                                                                                       |          |                |                           |                        |                      |
|-----------------------------------------------------------------------------------------------------------------------------------------------------------------------------------------------------------------------------------------------------------------------------|----------------------------------------------------------------------------------------------------------------------------------------------------------------|-------------------------------------------------------------------------------------------------------------------------------|---------------------------------------------------------------------------------------------------------------------------------------|----------|----------------|---------------------------|------------------------|----------------------|
| <p>65 Minaya-Muñoz F, Medina-Mirapeix F, Valera-Garrido F. Quality measures for the care of patients with lateral epicondylalgia. BMC Musculoskelet Disord. 2013 Oct 30;14:310. doi: 10.1186/1471-2474-14-310. PubMed PMID: 24172311; PubMed Central PMCID: PMC3816543.</p> | <p><a href="https://www.ncbi.nlm.nih.gov/pmc/articles/PMC3816543/">https://www.ncbi.nlm.nih.gov/pmc/articles/PMC3816543/</a> Physical therapy First line C</p> | <p>IF a patient is started on physical therapy to treat lateral epicondylalgia, THEN laser therapy should be tried first.</p> | <p>Percentage of patients who start physiotherapy to treat lateral epicondylitis in whom treatment with laser therapy is started.</p> | <p>2</p> | <p>Process</p> | <p>Musculoskeletal CC</p> | <p>Ambulatory care</p> | <p>Effectiveness</p> |
| <p>66 Minaya-Muñoz F, Medina-Mirapeix F, Valera-Garrido F. Quality measures for the care of patients with lateral epicondylalgia. BMC Musculoskelet Disord. 2013 Oct 30;14:310. doi: 10.1186/1471-2474-14-310. PubMed PMID: 24172311; PubMed Central PMCID: PMC3816543.</p> | <p><a href="https://www.ncbi.nlm.nih.gov/pmc/articles/PMC3816543/">https://www.ncbi.nlm.nih.gov/pmc/articles/PMC3816543/</a> Time to referral</p>              | <p>IF a patient is treated with corticosteroid injection for lateral epicondylalgia</p>                                       | <p>THEN a multimodal program of physical therapy should be initiated early before 14 days.</p>                                        | <p>2</p> | <p>Process</p> | <p>Musculoskeletal CC</p> | <p>Ambulatory care</p> | <p>Effectiveness</p> |

|    |                                                                                                                                                                                                                                                                                                                                              |                                                                                                                                 |                                                                                                                                                                          |                                                                                             |                                                                                                                                                                                     |                                                                                                                                                                                                                                                                             |   |         |                    |                               |               |
|----|----------------------------------------------------------------------------------------------------------------------------------------------------------------------------------------------------------------------------------------------------------------------------------------------------------------------------------------------|---------------------------------------------------------------------------------------------------------------------------------|--------------------------------------------------------------------------------------------------------------------------------------------------------------------------|---------------------------------------------------------------------------------------------|-------------------------------------------------------------------------------------------------------------------------------------------------------------------------------------|-----------------------------------------------------------------------------------------------------------------------------------------------------------------------------------------------------------------------------------------------------------------------------|---|---------|--------------------|-------------------------------|---------------|
| 67 | Peter WF, Hurkmans EJ, van der Wees PJ, Hendriks EJ, van Bodegom-Vos L, Vliet Vlieland TP. Healthcare Quality Indicators for Physiotherapy Management in Hip and Knee Osteoarthritis and Rheumatoid Arthritis: A Delphi Study. Musculoskeletal Care. 2016 Dec;14(4):219-232. doi: 10.1002/msc.1133. Epub 2016 Jan 22. PubMed PMID: 26799718. | <a href="https://onlinelibrary.wiley.com/doi/abs/10.1002/msc.1133">https://onlinelibrary.wiley.com/doi/abs/10.1002/msc.1133</a> | The physiotherapist should assess health-related problems according to all five domains of the International Classification of Functioning, Disability and Health (ICF). | The total number of patients with HKOA who have been treated during the previous 12 months. | The number of patients with HKOA who have been treated during the previous 12 months and in whom the health-related problems are assessed according to all five domains of the ICF. | Percentage of patients with osteoarthritis of the hip or knee who have been treated in the previous 12 months in which health-related problems have been evaluated according to the 5 categories of the International Classification of Functioning, Disability and Health. | 5 | Process | Musculoskeletal CC | Inpatient and ambulatory care | Effectiveness |
| 68 | Peter WF, Hurkmans EJ, van der Wees PJ, Hendriks EJ, van Bodegom-Vos L, Vliet Vlieland TP. Healthcare Quality Indicators for Physiotherapy Management in Hip and Knee Osteoarthritis and Rheumatoid Arthritis: A Delphi Study. Musculoskeletal Care. 2016 Dec;14(4):219-232. doi: 10.1002/msc.1133. Epub 2016 Jan 22. PubMed PMID: 26799718. | <a href="https://onlinelibrary.wiley.com/doi/abs/10.1002/msc.1134">https://onlinelibrary.wiley.com/doi/abs/10.1002/msc.1134</a> | The physiotherapist should assess barriers and facilitators for PT treatment.                                                                                            | The total number of patients with HKOA who have been treated during the previous 12 months. | The number of patients with HKOA who have been treated during the previous 12 months and in whom barriers and facilitators for PT treatment are assessed.                           | Percentage of patients with osteoarthritis of the hip or knee who have been treated in the previous 12 months in which barriers and facilitators for physiotherapy treatment have been evaluated.                                                                           | 5 | Process | Musculoskeletal CC | Inpatient and ambulatory care | Effectiveness |

|                                                                                                                                                                                                                                                                                                                                                        |                                                                                                                                        |                                                                                                                                                                                       |                                                                                                    |                                                                                                                                                                                                 |          |                |                           |                                      |                      |
|--------------------------------------------------------------------------------------------------------------------------------------------------------------------------------------------------------------------------------------------------------------------------------------------------------------------------------------------------------|----------------------------------------------------------------------------------------------------------------------------------------|---------------------------------------------------------------------------------------------------------------------------------------------------------------------------------------|----------------------------------------------------------------------------------------------------|-------------------------------------------------------------------------------------------------------------------------------------------------------------------------------------------------|----------|----------------|---------------------------|--------------------------------------|----------------------|
| <p>69 Peter WF, Hurkmans EJ, van der Wees PJ, Hendriks EJ, van Bodegom-Vos L, Vliet Vlieland TP. Healthcare Quality Indicators for Physiotherapy Management in Hip and Knee Osteoarthritis and Rheumatoid Arthritis: A Delphi Study. Musculoskeletal Care. 2016 Dec;14(4):219-232. doi: 10.1002/msc.1133. Epub 2016 Jan 22. PubMed PMID: 26799718.</p> | <p><a href="https://onlinelibrary.wiley.com/doi/abs/10.1002/msc.1135">https://onlinelibrary.wiley.com/doi/abs/10.1002/msc.1135</a></p> | <p>The physiotherapist should evaluate red flags specific for HKOA.</p>                                                                                                               | <p>The total number of patients with HKOA who have been treated during the previous 12 months.</p> | <p>The number of patients with HKOA who have been treated during the previous 12 months and in whom red flags specific for HKOA are evaluated.</p>                                              | <p>5</p> | <p>Process</p> | <p>Musculoskeletal CC</p> | <p>Inpatient and ambulatory care</p> | <p>Effectiveness</p> |
| <p>70 Peter WF, Hurkmans EJ, van der Wees PJ, Hendriks EJ, van Bodegom-Vos L, Vliet Vlieland TP. Healthcare Quality Indicators for Physiotherapy Management in Hip and Knee Osteoarthritis and Rheumatoid Arthritis: A Delphi Study. Musculoskeletal Care. 2016 Dec;14(4):219-232. doi: 10.1002/msc.1133. Epub 2016 Jan 22. PubMed PMID: 26799718.</p> | <p><a href="https://onlinelibrary.wiley.com/doi/abs/10.1002/msc.1136">https://onlinelibrary.wiley.com/doi/abs/10.1002/msc.1136</a></p> | <p>Based on clinical reasoning and shared decisionmaking, the physiotherapist should set specific, measurable, attainable, results-orientated and timely (SMART) treatment goals.</p> | <p>The total number of patients with HKOA who have been treated during the previous 12 months.</p> | <p>The number of patients with HKOA who have been treated during the previous 12 months and in whom, based on clinical reasoning and shared decision making, SMART treatment goals are set.</p> | <p>5</p> | <p>Process</p> | <p>Musculoskeletal CC</p> | <p>Inpatient and ambulatory care</p> | <p>Effectiveness</p> |

|                                                                                                                                                                                                                                                                                                                                                        |                                                                                                                                        |                                                                                                                                                                                                                  |                                                                                                                                                                                                                                                                                            |                                                                                                                                                                                                                      |                                                                                                                                                                                                                                                                                                           |          |                |                           |                                      |                      |
|--------------------------------------------------------------------------------------------------------------------------------------------------------------------------------------------------------------------------------------------------------------------------------------------------------------------------------------------------------|----------------------------------------------------------------------------------------------------------------------------------------|------------------------------------------------------------------------------------------------------------------------------------------------------------------------------------------------------------------|--------------------------------------------------------------------------------------------------------------------------------------------------------------------------------------------------------------------------------------------------------------------------------------------|----------------------------------------------------------------------------------------------------------------------------------------------------------------------------------------------------------------------|-----------------------------------------------------------------------------------------------------------------------------------------------------------------------------------------------------------------------------------------------------------------------------------------------------------|----------|----------------|---------------------------|--------------------------------------|----------------------|
| <p>71 Peter WF, Hurkmans EJ, van der Wees PJ, Hendriks EJ, van Bodegom-Vos L, Vliet Vlieland TP. Healthcare Quality Indicators for Physiotherapy Management in Hip and Knee Osteoarthritis and Rheumatoid Arthritis: A Delphi Study. Musculoskeletal Care. 2016 Dec;14(4):219-232. doi: 10.1002/msc.1133. Epub 2016 Jan 22. PubMed PMID: 26799718.</p> | <p><a href="https://onlinelibrary.wiley.com/doi/abs/10.1002/msc.1137">https://onlinelibrary.wiley.com/doi/abs/10.1002/msc.1137</a></p> | <p>The physiotherapist should provide information regarding a healthy lifestyle (physical activity, risk of overweight) and the relationship between the mental and physical load and load-bearing capacity.</p> | <p>The number of patients with HKOA who have been treated during the previous 12 months and in whom information regarding a healthy lifestyle (physical activity, risk of overweight) and the relationship between the mental and physical load and load-bearing capacity is provided.</p> | <p>The total number of patients with HKOA who have been treated during the previous 12 months.</p>                                                                                                                   | <p>Percentage of patients with osteoarthritis of the hip or knee who have been treated in the previous 12 months in which information on a healthy lifestyle (physical activity, risk of overweight) and the relationship between mental and physical load and ability have been provided of support.</p> | <p>5</p> | <p>Process</p> | <p>Musculoskeletal CC</p> | <p>Inpatient and ambulatory care</p> | <p>Effectiveness</p> |
| <p>72 Peter WF, Hurkmans EJ, van der Wees PJ, Hendriks EJ, van Bodegom-Vos L, Vliet Vlieland TP. Healthcare Quality Indicators for Physiotherapy Management in Hip and Knee Osteoarthritis and Rheumatoid Arthritis: A Delphi Study. Musculoskeletal Care. 2016 Dec;14(4):219-232. doi: 10.1002/msc.1133. Epub 2016 Jan 22. PubMed PMID: 26799718.</p> | <p><a href="https://onlinelibrary.wiley.com/doi/abs/10.1002/msc.1138">https://onlinelibrary.wiley.com/doi/abs/10.1002/msc.1138</a></p> | <p>The physiotherapist should provide information regarding knowledge, understanding and possible consequences of progression of HKOA.</p>                                                                       | <p>The total number of patients with HKOA who have been treated during the previous 12 months</p>                                                                                                                                                                                          | <p>The number of patients with HKOA who have been treated during the previous 12 months and in whom information regarding knowledge, understanding and possible consequences of progression of HKOA is provided.</p> | <p>Percentage of patients with osteoarthritis of the hip or knee who have been treated in the previous 12 months in which information on the knowledge, understanding and possible consequences of the progression of the disease has been provided.</p>                                                  | <p>5</p> | <p>Process</p> | <p>Musculoskeletal CC</p> | <p>Inpatient and ambulatory care</p> | <p>Effectiveness</p> |



|                                                                                                                                                                                                                                                                                                                                                        |                                                                                                                                        |                                                                                                                         |                                                                                                                                  |                                                                                                                                                                                     |                                                                                                                                                                                                                        |          |                |                           |                                      |                      |
|--------------------------------------------------------------------------------------------------------------------------------------------------------------------------------------------------------------------------------------------------------------------------------------------------------------------------------------------------------|----------------------------------------------------------------------------------------------------------------------------------------|-------------------------------------------------------------------------------------------------------------------------|----------------------------------------------------------------------------------------------------------------------------------|-------------------------------------------------------------------------------------------------------------------------------------------------------------------------------------|------------------------------------------------------------------------------------------------------------------------------------------------------------------------------------------------------------------------|----------|----------------|---------------------------|--------------------------------------|----------------------|
| <p>73 Peter WF, Hurkmans EJ, van der Wees PJ, Hendriks EJ, van Bodegom-Vos L, Vliet Vlieland TP. Healthcare Quality Indicators for Physiotherapy Management in Hip and Knee Osteoarthritis and Rheumatoid Arthritis: A Delphi Study. Musculoskeletal Care. 2016 Dec;14(4):219-232. doi: 10.1002/msc.1133. Epub 2016 Jan 22. PubMed PMID: 26799718.</p> | <p><a href="https://onlinelibrary.wiley.com/doi/abs/10.1002/msc.1139">https://onlinelibrary.wiley.com/doi/abs/10.1002/msc.1139</a></p> | <p>The physiotherapist should provide information regarding joint protection and the use of walking aids.</p>           | <p>The total number of patients with HKOA who have been treated during the previous 12 months.</p>                               | <p>The number of patients with HKOA who have been treated during the previous 12 months in whom information regarding joint protection and the use of walking aids is provided.</p> | <p>Percentage of patients with osteoarthritis of the hip or knee who have been treated in the previous 12 months in whom information has been provided on the protection of the joint and the use of walking aids.</p> | <p>2</p> | <p>Process</p> | <p>Musculoskeletal CC</p> | <p>Inpatient and ambulatory care</p> | <p>Effectiveness</p> |
| <p>74 Peter WF, Hurkmans EJ, van der Wees PJ, Hendriks EJ, van Bodegom-Vos L, Vliet Vlieland TP. Healthcare Quality Indicators for Physiotherapy Management in Hip and Knee Osteoarthritis and Rheumatoid Arthritis: A Delphi Study. Musculoskeletal Care. 2016 Dec;14(4):219-232. doi: 10.1002/msc.1133. Epub 2016 Jan 22. PubMed PMID: 26799718.</p> | <p><a href="https://onlinelibrary.wiley.com/doi/abs/10.1002/msc.1140">https://onlinelibrary.wiley.com/doi/abs/10.1002/msc.1140</a></p> | <p>If there is a lack of muscular strength, then the physiotherapist should provide muscle-strengthening exercises.</p> | <p>The total number of patients with HKOA and lack of muscular strength who have been treated during the previous 12 months.</p> | <p>The number of patients with HKOA and lack of muscular strength who have been treated during the previous 12 months in whom muscle-strengthening exercises are provided.</p>      | <p>Percentage of patients with osteoarthritis of the hip or knee and lack of muscle strength who have been treated in the previous 12 months in which muscle strengthening exercises have been provided.</p>           | <p>1</p> | <p>Process</p> | <p>Musculoskeletal CC</p> | <p>Inpatient and ambulatory care</p> | <p>Effectiveness</p> |

|                                                                                                                                                                                                                                                                                                                                                        |                                                                                                                                        |                                                                                                                                        |                                                                                                                                   |                                                                                                                                                                                            |                                                                                                                                                                                                                                             |          |                |                           |                                      |                      |
|--------------------------------------------------------------------------------------------------------------------------------------------------------------------------------------------------------------------------------------------------------------------------------------------------------------------------------------------------------|----------------------------------------------------------------------------------------------------------------------------------------|----------------------------------------------------------------------------------------------------------------------------------------|-----------------------------------------------------------------------------------------------------------------------------------|--------------------------------------------------------------------------------------------------------------------------------------------------------------------------------------------|---------------------------------------------------------------------------------------------------------------------------------------------------------------------------------------------------------------------------------------------|----------|----------------|---------------------------|--------------------------------------|----------------------|
| <p>75 Peter WF, Hurkmans EJ, van der Wees PJ, Hendriks EJ, van Bodegom-Vos L, Vliet Vlieland TP. Healthcare Quality Indicators for Physiotherapy Management in Hip and Knee Osteoarthritis and Rheumatoid Arthritis: A Delphi Study. Musculoskeletal Care. 2016 Dec;14(4):219-232. doi: 10.1002/msc.1133. Epub 2016 Jan 22. PubMed PMID: 26799718.</p> | <p><a href="https://onlinelibrary.wiley.com/doi/abs/10.1002/msc.1141">https://onlinelibrary.wiley.com/doi/abs/10.1002/msc.1141</a></p> | <p>If the aerobic capacity is decreased, then the physiotherapist should provide exercise therapy to improve the aerobic capacity.</p> | <p>The total number of patients with HKOA and decreased aerobic capacity who have been treated during the previous 12 months.</p> | <p>The number of patients with HKOA and decreased aerobic capacity who have been treated during the previous 12 months in whom exercises to improve the aerobic capacity are provided.</p> | <p>Percentage of patients with osteoarthritis of the hip or knee and decreased aerobic capacity who have been treated in the previous 12 months in which exercises have been provided to improve aerobic capacity.</p>                      | <p>1</p> | <p>Process</p> | <p>Musculoskeletal CC</p> | <p>Inpatient and ambulatory care</p> | <p>Effectiveness</p> |
| <p>76 Peter WF, Hurkmans EJ, van der Wees PJ, Hendriks EJ, van Bodegom-Vos L, Vliet Vlieland TP. Healthcare Quality Indicators for Physiotherapy Management in Hip and Knee Osteoarthritis and Rheumatoid Arthritis: A Delphi Study. Musculoskeletal Care. 2016 Dec;14(4):219-232. doi: 10.1002/msc.1133. Epub 2016 Jan 22. PubMed PMID: 26799718.</p> | <p><a href="https://onlinelibrary.wiley.com/doi/abs/10.1002/msc.1142">https://onlinelibrary.wiley.com/doi/abs/10.1002/msc.1142</a></p> | <p>The physiotherapist should provide functional exercises aimed at specific individualized tasks.</p>                                 | <p>The total number of patients with HKOA and decreased aerobic capacity who have been treated during the previous 12 months.</p> | <p>The number of patients with HKOA who have been treated during the previous 12 months in whom functional exercises to improve specific individualized tasks are provided.</p>            | <p>Percentage of patients with osteoarthritis of the hip or knee and decreased aerobic capacity who have been treated the previous 12 months in which functional exercises have been provided to improve specific individualized tasks.</p> | <p>5</p> | <p>Process</p> | <p>Musculoskeletal CC</p> | <p>Inpatient and ambulatory care</p> | <p>Effectiveness</p> |

|    |                                                                                                                                                                                                                                                                                                                                              |                                                                                                                                 |                                                                                                                                                                                                    |                                                                                                                             |                                                                                                                                                                                                                                      |                                                                                                                                                                                                                                                         |   |         |                    |                               |               |
|----|----------------------------------------------------------------------------------------------------------------------------------------------------------------------------------------------------------------------------------------------------------------------------------------------------------------------------------------------|---------------------------------------------------------------------------------------------------------------------------------|----------------------------------------------------------------------------------------------------------------------------------------------------------------------------------------------------|-----------------------------------------------------------------------------------------------------------------------------|--------------------------------------------------------------------------------------------------------------------------------------------------------------------------------------------------------------------------------------|---------------------------------------------------------------------------------------------------------------------------------------------------------------------------------------------------------------------------------------------------------|---|---------|--------------------|-------------------------------|---------------|
| 77 | Peter WF, Hurkmans EJ, van der Wees PJ, Hendriks EJ, van Bodegom-Vos L, Vliet Vlieland TP. Healthcare Quality Indicators for Physiotherapy Management in Hip and Knee Osteoarthritis and Rheumatoid Arthritis: A Delphi Study. Musculoskeletal Care. 2016 Dec;14(4):219-232. doi: 10.1002/msc.1133. Epub 2016 Jan 22. PubMed PMID: 26799718. | <a href="https://onlinelibrary.wiley.com/doi/abs/10.1002/msc.1143">https://onlinelibrary.wiley.com/doi/abs/10.1002/msc.1143</a> | If a patient underwent joint replacement surgery, then the physiotherapist should provide at least muscle strengthening exercises and functional exercises aimed at specific individualized tasks. | The total number of patients with HKOA who have been treated during the previous 12 months after joint replacement surgery. | The number of patients with HKOA who have been treated during the previous 12 months after joint replacement surgery in whom strengthening exercises and functional exercises to improve specific individualized tasks are provided. | Percentage of patients with osteoarthritis of the hip or knee who have been treated the previous 12 months after joint replacement surgery in which functional and strengthening exercises have been provided to improve specific individualized tasks. | 1 | Process | Musculoskeletal CC | Inpatient and ambulatory care | Effectiveness |
|----|----------------------------------------------------------------------------------------------------------------------------------------------------------------------------------------------------------------------------------------------------------------------------------------------------------------------------------------------|---------------------------------------------------------------------------------------------------------------------------------|----------------------------------------------------------------------------------------------------------------------------------------------------------------------------------------------------|-----------------------------------------------------------------------------------------------------------------------------|--------------------------------------------------------------------------------------------------------------------------------------------------------------------------------------------------------------------------------------|---------------------------------------------------------------------------------------------------------------------------------------------------------------------------------------------------------------------------------------------------------|---|---------|--------------------|-------------------------------|---------------|

|    |                                                                                                                                                                                                                                                                                                                                              |                                                                                                                                 |                                                                                                                                                                                                                                                                      |                                                                                                                                                                      |                                                                                                                                                                                                                                                                                                                              |                                                                                                                                                                                                                                                                                                                    |   |         |                    |                               |               |
|----|----------------------------------------------------------------------------------------------------------------------------------------------------------------------------------------------------------------------------------------------------------------------------------------------------------------------------------------------|---------------------------------------------------------------------------------------------------------------------------------|----------------------------------------------------------------------------------------------------------------------------------------------------------------------------------------------------------------------------------------------------------------------|----------------------------------------------------------------------------------------------------------------------------------------------------------------------|------------------------------------------------------------------------------------------------------------------------------------------------------------------------------------------------------------------------------------------------------------------------------------------------------------------------------|--------------------------------------------------------------------------------------------------------------------------------------------------------------------------------------------------------------------------------------------------------------------------------------------------------------------|---|---------|--------------------|-------------------------------|---------------|
| 78 | Peter WF, Hurkmans EJ, van der Wees PJ, Hendriks EJ, van Bodegom-Vos L, Vliet Vlieland TP. Healthcare Quality Indicators for Physiotherapy Management in Hip and Knee Osteoarthritis and Rheumatoid Arthritis: A Delphi Study. Musculoskeletal Care. 2016 Dec;14(4):219-232. doi: 10.1002/msc.1133. Epub 2016 Jan 22. PubMed PMID: 26799718. | <a href="https://onlinelibrary.wiley.com/doi/abs/10.1002/msc.1144">https://onlinelibrary.wiley.com/doi/abs/10.1002/msc.1144</a> | If there is severe pain and a reversible limitation in range of motion of the joint, then the physiotherapist should provide a combination of active exercise therapy and passive exercise therapy such as stretching, range of motion exercises and manual therapy. | The total number of patients with HKOA, severe pain and a reversible limitation in range of motion of the joint who have been treated during the previous 12 months. | The number of patients with HKOA, severe pain and a reversible limitation in range of motion of the joint who have been treated during the previous 12 months, in whom a combination of active exercise therapy and passive exercise therapy (such as stretching, range of motion exercises and manual therapy) is provided. | Percentage of patients with osteoarthritis of the hip or knee, severe pain, and a reversible limitation in the range of motion of the joint, treated in the previous 12 months, providing a combination of active and passive exercise therapy (such as stretching, range of motion exercises and manual therapy). | 1 | Process | Musculoskeletal CC | Inpatient and ambulatory care | Effectiveness |
|----|----------------------------------------------------------------------------------------------------------------------------------------------------------------------------------------------------------------------------------------------------------------------------------------------------------------------------------------------|---------------------------------------------------------------------------------------------------------------------------------|----------------------------------------------------------------------------------------------------------------------------------------------------------------------------------------------------------------------------------------------------------------------|----------------------------------------------------------------------------------------------------------------------------------------------------------------------|------------------------------------------------------------------------------------------------------------------------------------------------------------------------------------------------------------------------------------------------------------------------------------------------------------------------------|--------------------------------------------------------------------------------------------------------------------------------------------------------------------------------------------------------------------------------------------------------------------------------------------------------------------|---|---------|--------------------|-------------------------------|---------------|

|                                                                                                                                                                                                                                                                                                                                                        |                                                                                                                                        |                                                                                                                                                                                         |                                                                                                                             |                                                                                                                                                                                                                                                 |                                                                                                                                                                                                                                                                           |          |                |                           |                                      |                      |
|--------------------------------------------------------------------------------------------------------------------------------------------------------------------------------------------------------------------------------------------------------------------------------------------------------------------------------------------------------|----------------------------------------------------------------------------------------------------------------------------------------|-----------------------------------------------------------------------------------------------------------------------------------------------------------------------------------------|-----------------------------------------------------------------------------------------------------------------------------|-------------------------------------------------------------------------------------------------------------------------------------------------------------------------------------------------------------------------------------------------|---------------------------------------------------------------------------------------------------------------------------------------------------------------------------------------------------------------------------------------------------------------------------|----------|----------------|---------------------------|--------------------------------------|----------------------|
| <p>79 Peter WF, Hurkmans EJ, van der Wees PJ, Hendriks EJ, van Bodegom-Vos L, Vliet Vlieland TP. Healthcare Quality Indicators for Physiotherapy Management in Hip and Knee Osteoarthritis and Rheumatoid Arthritis: A Delphi Study. Musculoskeletal Care. 2016 Dec;14(4):219-232. doi: 10.1002/msc.1133. Epub 2016 Jan 22. PubMed PMID: 26799718.</p> | <p><a href="https://onlinelibrary.wiley.com/doi/abs/10.1002/msc.1145">https://onlinelibrary.wiley.com/doi/abs/10.1002/msc.1145</a></p> | <p>If there is patello-femoral osteoarthritis, then the physiotherapist should provide a combination of taping and functional exercises aimed at specific individualized tasks.</p>     | <p>The total number of patients with patella-femoral osteoarthritis who have been treated during the previous 12months.</p> | <p>The number of patients with patella-femoral osteoarthritis who have been treated during the previous 12 months in whom a combination of taping and functional exercises aimed at specific individualized tasks is provided.</p>              | <p>Percentage of patients with patellofemoral osteoarthritis who have been treated in the previous 12 months in which a combination of tape and functional exercises have been provided for specific individualized tasks.</p>                                            | <p>1</p> | <p>Process</p> | <p>Musculoskeletal CC</p> | <p>Inpatient and ambulatory care</p> | <p>Effectiveness</p> |
| <p>80 Peter WF, Hurkmans EJ, van der Wees PJ, Hendriks EJ, van Bodegom-Vos L, Vliet Vlieland TP. Healthcare Quality Indicators for Physiotherapy Management in Hip and Knee Osteoarthritis and Rheumatoid Arthritis: A Delphi Study. Musculoskeletal Care. 2016 Dec;14(4):219-232. doi: 10.1002/msc.1133. Epub 2016 Jan 22. PubMed PMID: 26799718.</p> | <p><a href="https://onlinelibrary.wiley.com/doi/abs/10.1002/msc.1146">https://onlinelibrary.wiley.com/doi/abs/10.1002/msc.1146</a></p> | <p>The physiotherapist should motivate and stimulate the patient to do recreational physical activities in order to maintain an adequate and healthy level of physical functioning.</p> | <p>The total number of patients with HKOA who have been treated during the previous 12 months.</p>                          | <p>The number of patients with HKOA who have been treated during the previous 12 months who are motivated and stimulated to do recreational physical activities in order to maintain an adequate and healthy level of physical functioning.</p> | <p>Percentage of patients with osteoarthritis of the hip or knee who have been treated in the previous 12 months and who have been motivated to carry out recreational physical activities to maintain an adequate and healthy level of function / physical activity.</p> | <p>5</p> | <p>Process</p> | <p>Musculoskeletal CC</p> | <p>Inpatient and ambulatory care</p> | <p>Effectiveness</p> |

|                                                                                                                                                                                                                                                                                                                                                        |                                                                                                                                        |                                                                                                                                  |                                                                                                    |                                                                                                                                                                         |                                                                                                                                                                                                       |          |                |                           |                                      |                      |
|--------------------------------------------------------------------------------------------------------------------------------------------------------------------------------------------------------------------------------------------------------------------------------------------------------------------------------------------------------|----------------------------------------------------------------------------------------------------------------------------------------|----------------------------------------------------------------------------------------------------------------------------------|----------------------------------------------------------------------------------------------------|-------------------------------------------------------------------------------------------------------------------------------------------------------------------------|-------------------------------------------------------------------------------------------------------------------------------------------------------------------------------------------------------|----------|----------------|---------------------------|--------------------------------------|----------------------|
| <p>81 Peter WF, Hurkmans EJ, van der Wees PJ, Hendriks EJ, van Bodegom-Vos L, Vliet Vlieland TP. Healthcare Quality Indicators for Physiotherapy Management in Hip and Knee Osteoarthritis and Rheumatoid Arthritis: A Delphi Study. Musculoskeletal Care. 2016 Dec;14(4):219-232. doi: 10.1002/msc.1133. Epub 2016 Jan 22. PubMed PMID: 26799718.</p> | <p><a href="https://onlinelibrary.wiley.com/doi/abs/10.1002/msc.1147">https://onlinelibrary.wiley.com/doi/abs/10.1002/msc.1147</a></p> | <p>The physiotherapist should evaluate treatment by using a questionnaire recommended in the PT guideline for HKOA.</p>          | <p>The total number of patients with HKOA who have been treated during the previous 12 months.</p> | <p>The number of patients with HKOA who have been treated during the previous 12 months in whom a questionnaire to evaluate treatment is used.</p>                      | <p>Percentage of patients with osteoarthritis of the hip or knee who have been treated in the previous 12 months in which a recommended questionnaire has been used to evaluate the treatment.</p>    | <p>4</p> | <p>Process</p> | <p>Musculoskeletal CC</p> | <p>Inpatient and ambulatory care</p> | <p>Effectiveness</p> |
| <p>82 Peter WF, Hurkmans EJ, van der Wees PJ, Hendriks EJ, van Bodegom-Vos L, Vliet Vlieland TP. Healthcare Quality Indicators for Physiotherapy Management in Hip and Knee Osteoarthritis and Rheumatoid Arthritis: A Delphi Study. Musculoskeletal Care. 2016 Dec;14(4):219-232. doi: 10.1002/msc.1133. Epub 2016 Jan 22. PubMed PMID: 26799718.</p> | <p><a href="https://onlinelibrary.wiley.com/doi/abs/10.1002/msc.1148">https://onlinelibrary.wiley.com/doi/abs/10.1002/msc.1148</a></p> | <p>The physiotherapist should evaluate treatment by using a performance-based test recommended in the PT guideline for HKOA.</p> | <p>The total number of patients with HKOA who have been treated during the previous 12 months.</p> | <p>The number of patients with HKOA who have been treated during the previous 12 months in whom a recommended performance-based test to evaluate treatment is used.</p> | <p>Percentage of patients with osteoarthritis of the hip or knee who have been treated in the previous 12 months in which a recommended performance-based test has been used to assess treatment.</p> | <p>3</p> | <p>Process</p> | <p>Musculoskeletal CC</p> | <p>Inpatient and ambulatory care</p> | <p>Effectiveness</p> |

|                                                                                                                                                                                                                                                                                                                                                                           |                                                                                                                                                      |                                                                                                                                        |                                                                                                                                               |                                                                                                                                                                                                                               |                                                                                                                                                                                                                |          |                                   |                                      |                      |
|---------------------------------------------------------------------------------------------------------------------------------------------------------------------------------------------------------------------------------------------------------------------------------------------------------------------------------------------------------------------------|------------------------------------------------------------------------------------------------------------------------------------------------------|----------------------------------------------------------------------------------------------------------------------------------------|-----------------------------------------------------------------------------------------------------------------------------------------------|-------------------------------------------------------------------------------------------------------------------------------------------------------------------------------------------------------------------------------|----------------------------------------------------------------------------------------------------------------------------------------------------------------------------------------------------------------|----------|-----------------------------------|--------------------------------------|----------------------|
| <p>83 Peter WF, Hurkmans EJ, van der Wees PJ, Hendriks EJ, van Bodegom-Vos L, Vliet Vlieland TP. Healthcare Quality Indicators for Physiotherapy Management in Hip and Knee Osteoarthritis and Rheumatoid Arthritis: A Delphi Study. Musculoskeletal Care. 2016 Dec;14(4):219-232. doi: 10.1002/msc.1133. Epub 2016 Jan 22. PubMed PMID: 26799718.</p>                    | <p><a href="https://onlinelibrary.wiley.com/doi/abs/10.1002/msc.1149">https://onlinelibrary.wiley.com/doi/abs/10.1002/msc.1149</a></p>               | <p>In using a recommended measurement instrument to evaluate PT treatment outcome, there should be an improvement of at least 20%.</p> | <p>The total number of patients with HKOA who have been treated during the previous 12 months after joint replacement surgery</p>             | <p>The number of patients with HKOA who have been treated during the previous 12 months in whom an improvement of at least 20% is achieved, measured using an instrument recommended in the PT guideline.</p>                 | <p>Percentage of patients with osteoarthritis of the hip or knee who have been treated in the previous 12 months after joint replacement surgery in whom an improvement of at least 20% has been achieved.</p> | <p>5</p> | <p>Outcome Musculoskeletal CC</p> | <p>Inpatient and ambulatory care</p> | <p>Effectiveness</p> |
| <p>84 Rizk H, Agrawal Y, Barthel S, Bennett ML, Doherty JK, Gerend P, Gold DR, Morrill D, Oas JG, Roberts JK, Woodson E, Zapala DA, Bennett A, Shenoy AM. Quality Improvement in Neurology: Neurotology Quality measurement Set. Otolaryngol Head Neck Surg. 2018 Oct;159(4):603-607. doi: 10.1177/0194599818790947. Epub 2018 Aug 31. Review. PubMed PMID: 30168353.</p> | <p><a href="https://journals.sagepub.com/doi/suppl/10.1177/0194599818790947">https://journals.sagepub.com/doi/suppl/10.1177/0194599818790947</a></p> | <p>Quality of Life for Patients with Neurotology Disorders</p>                                                                         | <p>Patients aged 18 years with neurotologyspecific diagnosis (see code descriptions) seen at least 2 times during the measurement period.</p> | <p>Patients with age-appropriate quality-of-life assessment whose most recent scores were maintained or improved on the same age appropriate quality-of-life assessment administered twice during the measurement period.</p> | <p>Percentage of patients over 18 years of age with a specific neurological diagnosis and quality of life evaluation in whom the scores obtained have been maintained or improved</p>                          | <p>1</p> | <p>Outcome Neurology CC</p>       | <p>Inpatient and ambulatory care</p> | <p>Effectiveness</p> |

|                                                                                                                                                                                                                                                                                                                                                                           |                                                                                                                                                      |                                                                                      |                                                                                |                                                                                                                                                                                                                                                                                                    |          |                             |                                      |                      |
|---------------------------------------------------------------------------------------------------------------------------------------------------------------------------------------------------------------------------------------------------------------------------------------------------------------------------------------------------------------------------|------------------------------------------------------------------------------------------------------------------------------------------------------|--------------------------------------------------------------------------------------|--------------------------------------------------------------------------------|----------------------------------------------------------------------------------------------------------------------------------------------------------------------------------------------------------------------------------------------------------------------------------------------------|----------|-----------------------------|--------------------------------------|----------------------|
| <p>85 Rizk H, Agrawal Y, Barthel S, Bennett ML, Doherty JK, Gerend P, Gold DR, Morrill D, Oas JG, Roberts JK, Woodson E, Zapala DA, Bennett A, Shenoy AM. Quality Improvement in Neurology: Neurotology Quality measurement Set. Otolaryngol Head Neck Surg. 2018 Oct;159(4):603-607. doi: 10.1177/0194599818790947. Epub 2018 Aug 31. Review. PubMed PMID: 30168353.</p> | <p><a href="https://journals.sagepub.com/doi/suppl/10.1177/0194599818790947">https://journals.sagepub.com/doi/suppl/10.1177/0194599818790947</a></p> | <p>Vestibular Rehabilitation for Unilateral or Bilateral Vestibular Hypofunction</p> | <p>Patients diagnosed with unilateral or bilateral vestibular hypofunction</p> | <p>Patients with an order for a referral to physical therapy or occupational therapy for vestibular rehabilitation OR prescription for vestibular rehabilitation OR documentation that vestibular rehabilitation was recommended OR documentation that vestibular rehabilitation was provided.</p> | <p>1</p> | <p>Process Neurology CC</p> | <p>Inpatient and ambulatory care</p> | <p>Effectiveness</p> |
| <p>86 Rizk H, Agrawal Y, Barthel S, Bennett ML, Doherty JK, Gerend P, Gold DR, Morrill D, Oas JG, Roberts JK, Woodson E, Zapala DA, Bennett A, Shenoy AM. Quality Improvement in Neurology: Neurotology Quality measurement Set. Otolaryngol Head Neck Surg. 2018 Oct;159(4):603-607. doi: 10.1177/0194599818790947. Epub 2018 Aug 31. Review. PubMed PMID: 30168353.</p> | <p><a href="https://journals.sagepub.com/doi/suppl/10.1177/0194599818790947">https://journals.sagepub.com/doi/suppl/10.1177/0194599818790947</a></p> | <p>Inquiring about Falls</p>                                                         | <p>ALL vulnerable elders</p>                                                   | <p>ALL vulnerable elders should have documentation that they were asked at least annually about the occurrence of recent falls</p>                                                                                                                                                                 | <p>3</p> | <p>Process Geriatric CC</p> | <p>Inpatient and ambulatory care</p> | <p>Safety</p>        |

|                                                                                                                                                                                                                                                                                                                                                                           |                                                                                                                                          |                                                |                                                                                                                             |                                                                                                                                                              |                                                                                                                                                                                                                                                           |                |                     |                                      |                      |
|---------------------------------------------------------------------------------------------------------------------------------------------------------------------------------------------------------------------------------------------------------------------------------------------------------------------------------------------------------------------------|------------------------------------------------------------------------------------------------------------------------------------------|------------------------------------------------|-----------------------------------------------------------------------------------------------------------------------------|--------------------------------------------------------------------------------------------------------------------------------------------------------------|-----------------------------------------------------------------------------------------------------------------------------------------------------------------------------------------------------------------------------------------------------------|----------------|---------------------|--------------------------------------|----------------------|
| <p>87 Rizk H, Agrawal Y, Barthel S, Bennett ML, Doherty JK, Gerend P, Gold DR, Morrill D, Oas JG, Roberts JK, Woodson E, Zapala DA, Bennett A, Shenoy AM. Quality Improvement in Neurology: Neurotology Quality measurement Set. Otolaryngol Head Neck Surg. 2018 Oct;159(4):603-607. doi: 10.1177/0194599818790947. Epub 2018 Aug 31. Review. PubMed PMID: 30168353.</p> | <p><a href="https://journals.sagepub.com/doi/10.1177/0194599818790947">https://journals.sagepub.com/doi/10.1177/0194599818790947</a></p> | <p>Detecting Balance and Gait Disturbances</p> | <p>ALL vulnerable elders</p>                                                                                                | <p>ALL vulnerable elders should have documentation that they were asked about or examined for the presence of balance or gait disturbances at least once</p> | <p>Percentage of vulnerable elderly patients in whom balance or gait disturbances have been asked or examined. 3</p>                                                                                                                                      | <p>Process</p> | <p>Geriatric CC</p> | <p>Inpatient and ambulatory care</p> | <p>Safety</p>        |
| <p>88 Rizk H, Agrawal Y, Barthel S, Bennett ML, Doherty JK, Gerend P, Gold DR, Morrill D, Oas JG, Roberts JK, Woodson E, Zapala DA, Bennett A, Shenoy AM. Quality Improvement in Neurology: Neurotology Quality measurement Set. Otolaryngol Head Neck Surg. 2018 Oct;159(4):603-607. doi: 10.1177/0194599818790947. Epub 2018 Aug 31. Review. PubMed PMID: 30168353.</p> | <p><a href="https://journals.sagepub.com/doi/10.1177/0194599818790947">https://journals.sagepub.com/doi/10.1177/0194599818790947</a></p> | <p>Basic Fall Evaluation</p>                   | <p>IF a vulnerable elder reported two or more falls in the past year, or a single fall with injury requiring treatment,</p> | <p>THEN there should be documentation that a basic fall evaluation was performed that resulted in specific diagnostic and therapeutic recommendations</p>    | <p>Percentage of vulnerable elderly, who have suffered at least 2 falls in the last year or a single fall with an injury, in whom a basic evaluation of falls has been completed establishing a specific diagnosis and therapeutic recommendations. 1</p> | <p>Process</p> | <p>Geriatric CC</p> | <p>Inpatient and ambulatory care</p> | <p>Effectiveness</p> |



|                                                                                                                                                                                                                                                                                                                                                                           |                                                                                                                                          |                                                                        |                                                                                                                             |                                                                                                                                                                                                  |                                                                                                                                                                                                                                                              |          |                |                     |                                      |                      |
|---------------------------------------------------------------------------------------------------------------------------------------------------------------------------------------------------------------------------------------------------------------------------------------------------------------------------------------------------------------------------|------------------------------------------------------------------------------------------------------------------------------------------|------------------------------------------------------------------------|-----------------------------------------------------------------------------------------------------------------------------|--------------------------------------------------------------------------------------------------------------------------------------------------------------------------------------------------|--------------------------------------------------------------------------------------------------------------------------------------------------------------------------------------------------------------------------------------------------------------|----------|----------------|---------------------|--------------------------------------|----------------------|
| <p>89 Rizk H, Agrawal Y, Barthel S, Bennett ML, Doherty JK, Gerend P, Gold DR, Morrill D, Oas JG, Roberts JK, Woodson E, Zapala DA, Bennett A, Shenoy AM. Quality Improvement in Neurology: Neurotology Quality measurement Set. Otolaryngol Head Neck Surg. 2018 Oct;159(4):603-607. doi: 10.1177/0194599818790947. Epub 2018 Aug 31. Review. PubMed PMID: 30168353.</p> | <p><a href="https://journals.sagepub.com/doi/10.1177/0194599818790947">https://journals.sagepub.com/doi/10.1177/0194599818790947</a></p> | <p>Gait–Mobility and Balance Evaluation</p>                            | <p>IF a vulnerable elder reports or is found to have new or worsening difficulty with ambulation, balance, or mobility,</p> | <p>THEN there should be documentation that a basic gait, mobility, and balance evaluation was performed within 6 months that resulted in specific diagnostic and therapeutic recommendations</p> | <p>Percentage of vulnerable elderly people with difficulties in walking, balance and mobility in which a basic evaluation has been carried out establishing therapeutic recommendations and specific diagnosis.</p>                                          | <p>5</p> | <p>Process</p> | <p>Geriatric CC</p> | <p>Inpatient and ambulatory care</p> | <p>Effectiveness</p> |
| <p>90 Rizk H, Agrawal Y, Barthel S, Bennett ML, Doherty JK, Gerend P, Gold DR, Morrill D, Oas JG, Roberts JK, Woodson E, Zapala DA, Bennett A, Shenoy AM. Quality Improvement in Neurology: Neurotology Quality measurement Set. Otolaryngol Head Neck Surg. 2018 Oct;159(4):603-607. doi: 10.1177/0194599818790947. Epub 2018 Aug 31. Review. PubMed PMID: 30168353.</p> | <p><a href="https://journals.sagepub.com/doi/10.1177/0194599818790947">https://journals.sagepub.com/doi/10.1177/0194599818790947</a></p> | <p>Exercise and Assistive-Device Prescription for Balance Problems</p> | <p>IF a vulnerable elder demonstrates decreased balance or proprioception, or increased postural sway,</p>                  | <p>THEN an appropriate exercise program should be offered and an evaluation for an assistive device performed</p>                                                                                | <p>Percentage of vulnerable elderly people, who demonstrate a decrease in balance or proprioception or an increase in postural deviation, in whom an adequate exercise program has been offered and the need for an assistive device has been evaluated.</p> | <p>1</p> | <p>Process</p> | <p>Geriatric CC</p> | <p>Inpatient and ambulatory care</p> | <p>Safety</p>        |

|                                                                                                                                                                                                                                                                                                                                                                           |                                                             |                                                                                                                                                                                                                                                |                                                                                                                                                                                         |                                                                                                                                     |          |                |                     |                                      |                      |
|---------------------------------------------------------------------------------------------------------------------------------------------------------------------------------------------------------------------------------------------------------------------------------------------------------------------------------------------------------------------------|-------------------------------------------------------------|------------------------------------------------------------------------------------------------------------------------------------------------------------------------------------------------------------------------------------------------|-----------------------------------------------------------------------------------------------------------------------------------------------------------------------------------------|-------------------------------------------------------------------------------------------------------------------------------------|----------|----------------|---------------------|--------------------------------------|----------------------|
| <p>91 Rizk H, Agrawal Y, Barthel S, Bennett ML, Doherty JK, Gerend P, Gold DR, Morrill D, Oas JG, Roberts JK, Woodson E, Zapala DA, Bennett A, Shenoy AM. Quality Improvement in Neurology: Neurotology Quality measurement Set. Otolaryngol Head Neck Surg. 2018 Oct;159(4):603-607. doi: 10.1177/0194599818790947. Epub 2018 Aug 31. Review. PubMed PMID: 30168353.</p> | <p>Exercise Prescription for Gait Problems and Weakness</p> | <p>IF a vulnerable elder is found to have problems with gait, strength (for example, #4 out of 5 on manual muscle testing, or the need to use his or her arms to rise from a chair), or endurance (for example, dyspnea on mild exertion),</p> | <p>THEN an exercise program should be offered</p>                                                                                                                                       | <p>Percentage of vulnerable seniors, who have gait, strength, or endurance problems, who have been offered an exercise program.</p> | <p>1</p> | <p>Process</p> | <p>Geriatric CC</p> | <p>Inpatient and ambulatory care</p> | <p>Effectiveness</p> |
| <p>92 Salvat-Plana M, Abilleira S, Jiménez C, et al. Priorización de indicadores de calidad de la atención al paciente con ictus a partir de un método de consenso. Rev calid asist. 2011;26(3):174–83.</p>                                                                                                                                                               | <p>Mobilización precoz 48 h</p>                             | <p>ictus agudo (a excepción de coma, ictus progresivo, hipotensión ortostática, IAM, TVP hasta que ACO efectiva)</p>                                                                                                                           | <p>Porcentaje de ictus agudos movilizados y fuera de la cama en las primeras 48 h (a excepción de coma, ictus progresivo, hipotensión ortostática, IAM, TVP hasta que ACO efectiva)</p> | <p>Percentage of patients with an acute stroke in whom they have moved and gotten out of bed in the first 48 hours.</p>             | <p>5</p> | <p>Process</p> | <p>Neurology CC</p> | <p>Inpatient and ambulatory care</p> | <p>Effectiveness</p> |

|    |                                                                                                                                                                                                   |                                                                                                                                                                                                                                                                                                 |                                                          |                                                                                                                                     |                                                                                                                                                                                 |                                                                                                                                                                                                               |   |         |              |                               |               |
|----|---------------------------------------------------------------------------------------------------------------------------------------------------------------------------------------------------|-------------------------------------------------------------------------------------------------------------------------------------------------------------------------------------------------------------------------------------------------------------------------------------------------|----------------------------------------------------------|-------------------------------------------------------------------------------------------------------------------------------------|---------------------------------------------------------------------------------------------------------------------------------------------------------------------------------|---------------------------------------------------------------------------------------------------------------------------------------------------------------------------------------------------------------|---|---------|--------------|-------------------------------|---------------|
| 93 | Salvat-Plana M, Abilleira S, Jiménez C, et al. Priorización de indicadores de calidad de la atención al paciente con ictus a partir de un método de consenso. Rev calid asist. 2011;26(3):174–83. | <a href="https://www.elsevier.es/es-revista-revista-calidad-asistencial-256-articulo-priorizacion-indicadores-calidad-atencion-al-S1134282X110003">https://www.elsevier.es/es-revista-revista-calidad-asistencial-256-articulo-priorizacion-indicadores-calidad-atencion-al-S1134282X110003</a> | Evaluación tratamiento rehabilitador < 48 h              | Porcentaje de pacientes con ictus                                                                                                   | Porcentaje de pacientes con ictus con evaluación de las necesidades de tratamiento rehabilitador en las primeras 48 h                                                           | Percentage of stroke patients in which the need for rehabilitation treatment in the first 48 hours has been evaluated.                                                                                        | 5 | Process | Neurology CC | Inpatient and ambulatory care | Effectiveness |
| 94 | Salvat-Plana M, Abilleira S, Jiménez C, et al. Priorización de indicadores de calidad de la atención al paciente con ictus a partir de un método de consenso. Rev calid asist. 2011;26(3):174–83. | <a href="https://www.elsevier.es/es-revista-revista-calidad-asistencial-256-articulo-priorizacion-indicadores-calidad-atencion-al-S1134282X110003">https://www.elsevier.es/es-revista-revista-calidad-asistencial-256-articulo-priorizacion-indicadores-calidad-atencion-al-S1134282X110003</a> | Rehabilitación precoz (fisioterapia/terapia ocupacional) | pacientes con paresia y situación funcional basal desfavorable (mRS ≥ 3 o IB ≤ 70). AIT excluidos (accidente isquémico transitorio) | Porcentaje de pacientes con paresia y situación funcional basal desfavorable (mRS ≥ 3 o IB ≤ 70) vistos o tratados por FS/TO en los primeros 2 días tras ingreso. AIT excluidos | Percentage of patients, excluding transient ischemic accident, with paresis and unfavorable baseline functional situation in those who were treated by a physiotherapist in the first 2 days after admission. | 5 | Process | Neurology CC | Inpatient and ambulatory care | Effectiveness |
| 95 | Salvat-Plana M, Abilleira S, Jiménez C, et al. Priorización de indicadores de calidad de la atención al paciente con ictus a partir de un método de consenso. Rev calid asist. 2011;26(3):174–83. | <a href="https://www.elsevier.es/es-revista-revista-calidad-asistencial-256-articulo-priorizacion-indicadores-calidad-atencion-al-S1134282X110003">https://www.elsevier.es/es-revista-revista-calidad-asistencial-256-articulo-priorizacion-indicadores-calidad-atencion-al-S1134282X110003</a> | Evaluación neurológica                                   | Ictus agudos                                                                                                                        | Porcentaje de de ictus agudos con una anamnesis/exploración neurológica en su HC                                                                                                | Percentage of patients with acute strokes in which an anamnesis or neurological examination has been recorded in their medical history.                                                                       | 5 | Process | Neurology CC | Inpatient and ambulatory care | Effectiveness |

|    |                                                                                                                                                                                                                                                                                                                                                                                                                            |                                                                                                                                       |                                  |                                   |                                                                                                                                             |                                                                                                                                                               |   |         |                 |                                  |               |
|----|----------------------------------------------------------------------------------------------------------------------------------------------------------------------------------------------------------------------------------------------------------------------------------------------------------------------------------------------------------------------------------------------------------------------------|---------------------------------------------------------------------------------------------------------------------------------------|----------------------------------|-----------------------------------|---------------------------------------------------------------------------------------------------------------------------------------------|---------------------------------------------------------------------------------------------------------------------------------------------------------------|---|---------|-----------------|----------------------------------|---------------|
| 96 | Saturno, P. J.,<br>Ángel-García, D. ,<br>Martínez-Nicolás, I.<br>, López Soriano, F. ,<br>Escolar Reina, M.<br>P., Guerrero Díaz,<br>M. B., Ros<br>Martínez, M. E.,<br>Medina Mirapeix,<br>F. and Saturno<br>Marcos, M. (2019),<br>Development and<br>Pilot Test of a New<br>Set of Good<br>Practice Indicators<br>for Chronic<br>Nonmalignant Pain<br>Management. Pain<br>Pract, 19: 37-51.<br>doi:10.1111/papr.1<br>2715 | <a href="https://onlinelibrary.wiley.com/doi/full/10.1111/papr.12715">https://onlinelibrary.wiley.com/doi/full/10.1111/papr.12715</a> | Chronic pain<br>Clinical history | All patients with chronic<br>pain | All patients with chronic<br>pain should have a<br>documented clinical history                                                              | Percentage of patients<br>with chronic pain who<br>have had a documented<br>medical history.                                                                  | 3 | Process | Chronic pain CC | Inpatient and ambulatory<br>care | Effectiveness |
| 97 | Saturno, P. J.,<br>Ángel-García, D. ,<br>Martínez-Nicolás, I.<br>, López Soriano, F. ,<br>Escolar Reina, M.<br>P., Guerrero Díaz,<br>M. B., Ros<br>Martínez, M. E.,<br>Medina Mirapeix,<br>F. and Saturno<br>Marcos, M. (2019),<br>Development and<br>Pilot Test of a New<br>Set of Good<br>Practice Indicators<br>for Chronic<br>Nonmalignant Pain<br>Management. Pain<br>Pract, 19: 37-51.<br>doi:10.1111/papr.1<br>2715 | <a href="https://onlinelibrary.wiley.com/doi/full/10.1111/papr.12716">https://onlinelibrary.wiley.com/doi/full/10.1111/papr.12716</a> | Physical<br>examination          | All patients with chronic<br>pain | All patients with chronic<br>pain should have a physical<br>examination, including:<br>Neurological and<br>musculoskeletal<br>examinations. | Percentage of patients<br>with chronic pain who<br>have undergone a<br>physical examination<br>including neurological and<br>musculoskeletal<br>examinations. | 3 | Process | Chronic pain CC | Inpatient and ambulatory<br>care | Effectiveness |

|                                                                                                                                                                                                                                                                                                                                                                                                                                                                              |                                                                                                                                              |                                             |                                                 |                                                                                                                                                            |                                                                                                                                                      |          |                |                           |                        |                      |
|------------------------------------------------------------------------------------------------------------------------------------------------------------------------------------------------------------------------------------------------------------------------------------------------------------------------------------------------------------------------------------------------------------------------------------------------------------------------------|----------------------------------------------------------------------------------------------------------------------------------------------|---------------------------------------------|-------------------------------------------------|------------------------------------------------------------------------------------------------------------------------------------------------------------|------------------------------------------------------------------------------------------------------------------------------------------------------|----------|----------------|---------------------------|------------------------|----------------------|
| <p>98 Saturno, P. J.,<br/> Ángel-García, D. ,<br/> Martínez-Nicolás, I.<br/> , López Soriano, F. ,<br/> Escolar Reina, M.<br/> P., Guerrero Díaz,<br/> M. B., Ros<br/> Martínez, M. E.,<br/> Medina Mirapeix,<br/> F. and Saturno<br/> Marcos, M. (2019),<br/> Development and<br/> Pilot Test of a New<br/> Set of Good<br/> Practice Indicators<br/> for Chronic<br/> Nonmalignant Pain<br/> Management. Pain<br/> Pract, 19: 37-51.<br/> doi:10.1111/papr.1<br/> 2715</p> | <p><a href="https://onlinelibrary.wiley.com/doi/full/10.1111/papr.12717">https://onlinelibrary.wiley.com/doi/full/10.1111/papr.12717</a></p> | <p>Non-specific low back pain exercise</p>  | <p>Patients with non-specific low back pain</p> | <p>Percentage of patients seen with non-specific low back pain with evidence of inclusion in an educational programme for a return to normal activity.</p> | <p>Percentage of patient with non-specific low back pain in those who have been included in an educational program to return to normal activity.</p> | <p>1</p> | <p>Process</p> | <p>Musculoskeletal CC</p> | <p>Ambulatory care</p> | <p>Effectiveness</p> |
| <p>99 Saturno, P. J.,<br/> Ángel-García, D. ,<br/> Martínez-Nicolás, I.<br/> , López Soriano, F. ,<br/> Escolar Reina, M.<br/> P., Guerrero Díaz,<br/> M. B., Ros<br/> Martínez, M. E.,<br/> Medina Mirapeix,<br/> F. and Saturno<br/> Marcos, M. (2019),<br/> Development and<br/> Pilot Test of a New<br/> Set of Good<br/> Practice Indicators<br/> for Chronic<br/> Nonmalignant Pain<br/> Management. Pain<br/> Pract, 19: 37-51.<br/> doi:10.1111/papr.1<br/> 2715</p> | <p><a href="https://onlinelibrary.wiley.com/doi/full/10.1111/papr.12718">https://onlinelibrary.wiley.com/doi/full/10.1111/papr.12718</a></p> | <p>Non-specific low back pain education</p> | <p>Patients with non-specific low back pain</p> | <p>Percentage of patients seen with non-specific low back pain with evidence of inclusion in a therapeutic exercise programme.</p>                         | <p>Percentage of patient with non-specific low-back pain in those who have been included in a therapeutic exercise program.</p>                      | <p>1</p> | <p>Process</p> | <p>Musculoskeletal CC</p> | <p>Ambulatory care</p> | <p>Effectiveness</p> |

|                                                                                                                                                                                                                                                                                                                                                                                                                                                                               |                                                                                                                                                                                                                           |                                                     |                                                                                                                                  |                                                                                                                                            |          |                |                           |                                      |                      |
|-------------------------------------------------------------------------------------------------------------------------------------------------------------------------------------------------------------------------------------------------------------------------------------------------------------------------------------------------------------------------------------------------------------------------------------------------------------------------------|---------------------------------------------------------------------------------------------------------------------------------------------------------------------------------------------------------------------------|-----------------------------------------------------|----------------------------------------------------------------------------------------------------------------------------------|--------------------------------------------------------------------------------------------------------------------------------------------|----------|----------------|---------------------------|--------------------------------------|----------------------|
| <p>100 Saturno, P. J.,<br/> Ángel-García, D. ,<br/> Martínez-Nicolás, I.<br/> , López Soriano, F. ,<br/> Escolar Reina, M.<br/> P., Guerrero Díaz,<br/> M. B., Ros<br/> Martínez, M. E.,<br/> Medina Mirapeix,<br/> F. and Saturno<br/> Marcos, M. (2019),<br/> Development and<br/> Pilot Test of a New<br/> Set of Good<br/> Practice Indicators<br/> for Chronic<br/> Nonmalignant Pain<br/> Management. Pain<br/> Pract, 19: 37-51.<br/> doi:10.1111/papr.1<br/> 2715</p> | <p><a href="https://onlinelibrary.wiley.com/doi/full/10.1111/papr.12719">https://onlinelibrary.wiley.com/doi/full/10.1111/papr.12719</a><br/> Cognitive behaviour treatment programmes for non-specific low back pain</p> | <p>Patients with non-specific low back pain</p>     | <p>Percentage of patients seen with non-specific low back pain with evidence of inclusion in a cognitive behaviour programme</p> | <p>Percentage of patient with non-specific low-back pain in those who have been included in a cognitive behavioral therapy.</p>            | <p>1</p> | <p>Process</p> | <p>Musculoskeletal CC</p> | <p>Ambulatory care</p>               | <p>Effectiveness</p> |
| <p>101 Saturno, P. J.,<br/> Ángel-García, D. ,<br/> Martínez-Nicolás, I.<br/> , López Soriano, F. ,<br/> Escolar Reina, M.<br/> P., Guerrero Díaz,<br/> M. B., Ros<br/> Martínez, M. E.,<br/> Medina Mirapeix,<br/> F. and Saturno<br/> Marcos, M. (2019),<br/> Development and<br/> Pilot Test of a New<br/> Set of Good<br/> Practice Indicators<br/> for Chronic<br/> Nonmalignant Pain<br/> Management. Pain<br/> Pract, 19: 37-51.<br/> doi:10.1111/papr.1<br/> 2715</p> | <p><a href="https://onlinelibrary.wiley.com/doi/full/10.1111/papr.12720">https://onlinelibrary.wiley.com/doi/full/10.1111/papr.12720</a><br/> Supervised therapeutic exercise for Osteoarthritis</p>                      | <p>Patients with osteoarthritis in hip and knee</p> | <p>Percentage of patients being treated for osteoarthritis included in a supervised therapeutic exercise programme.</p>          | <p>Percentage of patients with osteoarthritis of the hip and knee who have been included in a supervised therapeutic exercise program.</p> | <p>1</p> | <p>Process</p> | <p>Rheumatology CC</p>    | <p>Inpatient and ambulatory care</p> | <p>Effectiveness</p> |

|                                                                                                                                                                                                                                                                                                                                                                                                                                                                               |                                                                                                                                                                                                    |                                                                                                                                                                                                              |                                                                                                                                                                                     |          |                |                        |                                      |                      |
|-------------------------------------------------------------------------------------------------------------------------------------------------------------------------------------------------------------------------------------------------------------------------------------------------------------------------------------------------------------------------------------------------------------------------------------------------------------------------------|----------------------------------------------------------------------------------------------------------------------------------------------------------------------------------------------------|--------------------------------------------------------------------------------------------------------------------------------------------------------------------------------------------------------------|-------------------------------------------------------------------------------------------------------------------------------------------------------------------------------------|----------|----------------|------------------------|--------------------------------------|----------------------|
| <p>102 Saturno, P. J.,<br/> Ángel-García, D. ,<br/> Martínez-Nicolás, I.<br/> , López Soriano, F. ,<br/> Escolar Reina, M.<br/> P., Guerrero Díaz,<br/> M. B., Ros<br/> Martínez, M. E.,<br/> Medina Mirapeix,<br/> F. and Saturno<br/> Marcos, M. (2019),<br/> Development and<br/> Pilot Test of a New<br/> Set of Good<br/> Practice Indicators<br/> for Chronic<br/> Nonmalignant Pain<br/> Management. Pain<br/> Pract, 19: 37-51.<br/> doi:10.1111/papr.1<br/> 2715</p> | <p><a href="https://onlinelibrary.wiley.com/doi/full/10.1111/papr.12721">https://onlinelibrary.wiley.com/doi/full/10.1111/papr.12721</a> Assess the need for walking aids<br/> Osteoarthritis</p>  | <p>Percentage of patients with osteoarthritis experiencing difficulties with walking and daily life activities for more than 3 months advised to use a walking aid.</p>                                      | <p>Percentage of patients with osteoarthritis experiencing difficulties in walking and activities of daily life in whom it has been advised to use a technical aid for walking.</p> | <p>3</p> | <p>Process</p> | <p>Rheumatology CC</p> | <p>Inpatient and ambulatory care</p> | <p>Safety</p>        |
| <p>103 Saturno, P. J.,<br/> Ángel-García, D. ,<br/> Martínez-Nicolás, I.<br/> , López Soriano, F. ,<br/> Escolar Reina, M.<br/> P., Guerrero Díaz,<br/> M. B., Ros<br/> Martínez, M. E.,<br/> Medina Mirapeix,<br/> F. and Saturno<br/> Marcos, M. (2019),<br/> Development and<br/> Pilot Test of a New<br/> Set of Good<br/> Practice Indicators<br/> for Chronic<br/> Nonmalignant Pain<br/> Management. Pain<br/> Pract, 19: 37-51.<br/> doi:10.1111/papr.1<br/> 2715</p> | <p><a href="https://onlinelibrary.wiley.com/doi/full/10.1111/papr.12722">https://onlinelibrary.wiley.com/doi/full/10.1111/papr.12722</a> Assessment of disease activity in reumatoid arthritis</p> | <p>Patients with reumatoid arthritis<br/> Percentage of patients seen with reumatoid arthritis whose disease activity is measured regularly using standardised measurement systems such as DAS or DAS28.</p> | <p>Percentage of patients with reumatoid arthritis in whom disease activity has been measured with Disease Activity Score.</p>                                                      | <p>1</p> | <p>Process</p> | <p>Rheumatology CC</p> | <p>Inpatient and ambulatory care</p> | <p>Effectiveness</p> |

|                                                                                                                                                                                                                                                                                                                                                                                                                                                                            |                                                                                                                                                                                                                 |                                           |                                                                                                                    |                                                                                                                                         |          |                |                        |                                      |                      |
|----------------------------------------------------------------------------------------------------------------------------------------------------------------------------------------------------------------------------------------------------------------------------------------------------------------------------------------------------------------------------------------------------------------------------------------------------------------------------|-----------------------------------------------------------------------------------------------------------------------------------------------------------------------------------------------------------------|-------------------------------------------|--------------------------------------------------------------------------------------------------------------------|-----------------------------------------------------------------------------------------------------------------------------------------|----------|----------------|------------------------|--------------------------------------|----------------------|
| <p>104 Saturno, P. J.,<br/> Ángel-García, D.,<br/> Martínez-Nicolás, I.,<br/> López Soriano, F.,<br/> Escolar Reina, M.<br/> P., Guerrero Díaz,<br/> M. B., Ros<br/> Martínez, M. E.,<br/> Medina Mirapeix,<br/> F. and Saturno<br/> Marcos, M. (2019),<br/> Development and<br/> Pilot Test of a New<br/> Set of Good<br/> Practice Indicators<br/> for Chronic<br/> Nonmalignant Pain<br/> Management. Pain<br/> Pract, 19: 37-51.<br/> doi:10.1111/papr.1<br/> 2715</p> | <p><a href="https://onlinelibrary.wiley.com/doi/full/10.1111/papr.12723">https://onlinelibrary.wiley.com/doi/full/10.1111/papr.12723</a> Supervised therapeutic exercise treatment for rheumatoid arthritis</p> | <p>Patients with rheumatoid arthritis</p> | <p>Percentage of patients with rheumatoid arthritis included in a supervised low-intensity exercise programme.</p> | <p>Percentage of rheumatoid arthritis patients who have been included in a supervised low-intensity exercise program.</p>               | <p>1</p> | <p>Process</p> | <p>Rheumatology CC</p> | <p>Inpatient and ambulatory care</p> | <p>Effectiveness</p> |
| <p>105 Saturno, P. J.,<br/> Ángel-García, D.,<br/> Martínez-Nicolás, I.,<br/> López Soriano, F.,<br/> Escolar Reina, M.<br/> P., Guerrero Díaz,<br/> M. B., Ros<br/> Martínez, M. E.,<br/> Medina Mirapeix,<br/> F. and Saturno<br/> Marcos, M. (2019),<br/> Development and<br/> Pilot Test of a New<br/> Set of Good<br/> Practice Indicators<br/> for Chronic<br/> Nonmalignant Pain<br/> Management. Pain<br/> Pract, 19: 37-51.<br/> doi:10.1111/papr.1<br/> 2715</p> | <p><a href="https://onlinelibrary.wiley.com/doi/full/10.1111/papr.12724">https://onlinelibrary.wiley.com/doi/full/10.1111/papr.12724</a> Assessment of disease impact in fibromyalgia</p>                       | <p>Patients seen with fibromyalgia</p>    | <p>Percentage of patients seen with fibromyalgia given a validated questionnaire to assess disease impact.</p>     | <p>Percentage of fibromyalgia patients in whom a validated questionnaire has been administered to assess the impact of the disease.</p> | <p>1</p> | <p>Process</p> | <p>Rheumatology CC</p> | <p>Inpatient and ambulatory care</p> | <p>Effectiveness</p> |



|     |                                                                                                                                                                                                                                                                                                                                                                                                                            |                                                                                                                                                                                                                                                                                   |                                                 |                                 |                                                                                                                                   |                                                                                                                                                |   |         |                 |                               |               |
|-----|----------------------------------------------------------------------------------------------------------------------------------------------------------------------------------------------------------------------------------------------------------------------------------------------------------------------------------------------------------------------------------------------------------------------------|-----------------------------------------------------------------------------------------------------------------------------------------------------------------------------------------------------------------------------------------------------------------------------------|-------------------------------------------------|---------------------------------|-----------------------------------------------------------------------------------------------------------------------------------|------------------------------------------------------------------------------------------------------------------------------------------------|---|---------|-----------------|-------------------------------|---------------|
| 106 | Saturno, P. J.,<br>Ángel-García, D. ,<br>Martínez-Nicolás, I.<br>, López Soriano, F. ,<br>Escolar Reina, M.<br>P., Guerrero Díaz,<br>M. B., Ros<br>Martínez, M. E.,<br>Medina Mirapeix,<br>F. and Saturno<br>Marcos, M. (2019),<br>Development and<br>Pilot Test of a New<br>Set of Good<br>Practice Indicators<br>for Chronic<br>Nonmalignant Pain<br>Management. Pain<br>Pract, 19: 37-51.<br>doi:10.1111/papr.1<br>2715 | <a href="https://onlinelibrary.wiley.com/doi/full/10.1111/papr.12725">https://onlinelibrary.wiley.com/doi/full/10.1111/papr.12725</a>                                                                                                                                             | Aerobic exercise treatment. For fibromyalgia    | Patients seen with fibromyalgia | Percentage of patients with fibromyalgia included in a supervised aerobic exercise programme                                      | Percentage of fibromyalgia patients who have been included in a supervised aerobic exercise program                                            | 1 | Process | Rheumatology CC | Inpatient and ambulatory care | Effectiveness |
| 107 | Schnelle J, Smith RL. Quality Indicators for the Management of Urinary Incontinence in Vulnerable Community-Dwelling Elders. Ann Intern Med. 2001;135:752–758. doi: 10.7326/0003-4819-135-8_Part_2-200110161-00015                                                                                                                                                                                                         | <a href="https://annals.org/aim/fullarticle/714869/quality-indicators-management-urinary-incontinence-vulnerable-community-dwelling-elders">https://annals.org/aim/fullarticle/714869/quality-indicators-management-urinary-incontinence-vulnerable-community-dwelling-elders</a> | Initial Evaluation: Detection of Incontinence a | ALL vulnerable elders           | ALL vulnerable elders should have documentation of the presence or absence of urinary incontinence during the initial evaluation. | Percentage of vulnerable elderly people in whom the presence or absence of urinary incontinence has been documented in the initial evaluation. | 5 | Process | Geriatric CC    | Inpatient and ambulatory care | Effectiveness |

|     |                                                                                                                                                                                                                    |                                                                                                                                                                                                                                                                                   |                                                 |                                                                                                                                                 |                                                                                                                                                                                                                                                                    |                                                                                                                                                                                                                                                                                                |   |         |                                       |                               |               |
|-----|--------------------------------------------------------------------------------------------------------------------------------------------------------------------------------------------------------------------|-----------------------------------------------------------------------------------------------------------------------------------------------------------------------------------------------------------------------------------------------------------------------------------|-------------------------------------------------|-------------------------------------------------------------------------------------------------------------------------------------------------|--------------------------------------------------------------------------------------------------------------------------------------------------------------------------------------------------------------------------------------------------------------------|------------------------------------------------------------------------------------------------------------------------------------------------------------------------------------------------------------------------------------------------------------------------------------------------|---|---------|---------------------------------------|-------------------------------|---------------|
| 108 | Schnelle J, Smith RL. Quality Indicators for the Management of Urinary Incontinence in Vulnerable Community-Dwelling Elders. Ann Intern Med. 2001;135:752-758. doi: 10.7326/0003-4819-135-8_Part_2-200110161-00016 | <a href="https://annals.org/aim/fullarticle/714869/quality-indicators-management-urinary-incontinence-vulnerable-community-dwelling-elders">https://annals.org/aim/fullarticle/714869/quality-indicators-management-urinary-incontinence-vulnerable-community-dwelling-elders</a> | Initial Evaluation: Detection of Incontinence b | ALL vulnerable elders should have annual documentation of the presence or absence of urinary incontinence                                       | ALL vulnerable elders should have annual documentation of the presence or absence of urinary incontinence                                                                                                                                                          | Percentage of vulnerable elderly people in whom the presence or absence of urinary incontinence has been documented annually.                                                                                                                                                                  | 5 | Process | Geriatric CC                          | Inpatient and ambulatory care | Effectiveness |
| 109 | Schnelle J, Smith RL. Quality Indicators for the Management of Urinary Incontinence in Vulnerable Community-Dwelling Elders. Ann Intern Med. 2001;135:752-758. doi: 10.7326/0003-4819-135-8_Part_2-200110161-00017 | <a href="https://annals.org/aim/fullarticle/714869/quality-indicators-management-urinary-incontinence-vulnerable-community-dwelling-elders">https://annals.org/aim/fullarticle/714869/quality-indicators-management-urinary-incontinence-vulnerable-community-dwelling-elders</a> | Targeted History                                | IF a vulnerable elder has new urinary incontinence that persists for more than 1 month or urinary incontinence at the time of a new evaluation, | THEN a targeted history should be obtained that documents each of the following: 1) characteristics of voiding, 2) ability to get to the toilet, 3) previous treatment for urinary incontinence, 4) importance of the problem to the patient, and 5) mental status | Percentage of vulnerable elderly people with urinary incontinence in whom a specific medical history has been completed (characteristics of urination, ability to go to the bathroom, previous treatment for urinary incontinence, importance of the problem for the patient and mental state) | 4 | Process | Gynaecology / urology / proctology CC | Inpatient and ambulatory care | Effectiveness |
| 110 | Schnelle J, Smith RL. Quality Indicators for the Management of Urinary Incontinence in Vulnerable Community-Dwelling Elders. Ann Intern Med. 2001;135:752-758. doi: 10.7326/0003-4819-135-8_Part_2-200110161-00018 | <a href="https://annals.org/aim/fullarticle/714869/quality-indicators-management-urinary-incontinence-vulnerable-community-dwelling-elders">https://annals.org/aim/fullarticle/714869/quality-indicators-management-urinary-incontinence-vulnerable-community-dwelling-elders</a> | Targeted Physical Examination                   | IF a vulnerable elder has new urinary incontinence that persists for more than 1 month or urinary incontinence at the time of a new evaluation, | THEN a targeted physical examination should be performed that documents 1) a rectal examination and 2) a genital system examination (including a pelvic examination for women)                                                                                     | Percentage of vulnerable elderly people with urinary incontinence who have undergone a rectal and genital examination (including the pelvic floor, in the case of women)                                                                                                                       | 4 | Process | Gynaecology / urology / proctology CC | Inpatient and ambulatory care | Effectiveness |

|     |                                                                                                                                                                                                                                                                                                                 |                                                                                                                                                                                                                                                                                   |                                                    |                                                                                                                                                                                               |                                                                                                                                                                                  |                                                                                                                                                                                                                                   |   |         |                                       |                               |                       |
|-----|-----------------------------------------------------------------------------------------------------------------------------------------------------------------------------------------------------------------------------------------------------------------------------------------------------------------|-----------------------------------------------------------------------------------------------------------------------------------------------------------------------------------------------------------------------------------------------------------------------------------|----------------------------------------------------|-----------------------------------------------------------------------------------------------------------------------------------------------------------------------------------------------|----------------------------------------------------------------------------------------------------------------------------------------------------------------------------------|-----------------------------------------------------------------------------------------------------------------------------------------------------------------------------------------------------------------------------------|---|---------|---------------------------------------|-------------------------------|-----------------------|
| 111 | Schnelle J, Smith RL. Quality Indicators for the Management of Urinary Incontinence in Vulnerable Community-Dwelling Elders. Ann Intern Med. 2001;135:752-758. doi: 10.7326/0003-4819-135-8_Part_2-200110161-00019                                                                                              | <a href="https://annals.org/aim/fullarticle/714869/quality-indicators-management-urinary-incontinence-vulnerable-community-dwelling-elders">https://annals.org/aim/fullarticle/714869/quality-indicators-management-urinary-incontinence-vulnerable-community-dwelling-elders</a> | Discuss Treatment Options for Urinary Incontinence | IF a vulnerable elder has new urinary incontinence or urinary incontinence at the time of a new evaluation,                                                                                   | THEN treatment options should be discussed                                                                                                                                       | Percentage of vulnerable elderly people with urinary incontinence in whom treatment options have been discussed.                                                                                                                  | 4 | Process | Gynaecology / urology / proctology CC | Inpatient and ambulatory care | Patient-centered care |
| 112 | Schnelle J, Smith RL. Quality Indicators for the Management of Urinary Incontinence in Vulnerable Community-Dwelling Elders. Ann Intern Med. 2001;135:752-758. doi: 10.7326/0003-4819-135-8_Part_2-200110161-00020                                                                                              | <a href="https://annals.org/aim/fullarticle/714869/quality-indicators-management-urinary-incontinence-vulnerable-community-dwelling-elders">https://annals.org/aim/fullarticle/714869/quality-indicators-management-urinary-incontinence-vulnerable-community-dwelling-elders</a> | Behavioral Therapy                                 | IF a cognitively intact vulnerable elder who is capable of independent toileting has documented stress, urge, or mixed incontinence without evidence of hematuria or high post-void residual, | THEN behavioral treatment should be offered                                                                                                                                      | Percentage of vulnerable elderly, cognitively intact and independent for hygiene, who document stress, mixed and urgent urinary incontinence in whom behavioral treatment has been offered.                                       | 2 | Process | Gynaecology / urology / proctology CC | Inpatient and ambulatory care | Effectiveness         |
| 113 | Cavalheiro LV, Eid RA, Talerman C, Prado Cd, Gobbi FC, Andreoli PB. Design of an instrument to measure the quality of care in Physical Therapy. Einstein (Sao Paulo). 2015 Apr-Jun;13(2):260-8. doi: 0.1590/S1679-45082015GS3248. English, Portuguese. PubMed PMID: 26154548; PubMed Central PMCID: PMC4943820. | <a href="http://www.scielo.br/scielo.php?script=sci_arttext&amp;pid=S1679-45082015000200016&amp;lng=en&amp;nrm=iso&amp;tlng=en">http://www.scielo.br/scielo.php?script=sci_arttext&amp;pid=S1679-45082015000200016&amp;lng=en&amp;nrm=iso&amp;tlng=en</a>                         | Evolution of mobility/functionality                | Total number of patients subjected to mobility/functionality evaluation                                                                                                                       | Total number of patients who reached the reference value in the score (Functional Independence Measure (FIM) score for adults, and the Alberta Infant Motor Scale for children.) | Percentage of patients subdued to a mobility or functionality assessment in which the reference value in the adult and child score has been reached, using the Functional Independence Measure or the Alberta Infant Motor Scale. | 5 | Outcome | all patients CC                       | Inpatient and ambulatory care | Effectiveness         |

|                                                                                                                                                                                                                                                                                                                            |                                                                                                                                                                                                                                                                  |                                    |                                                                 |                                                                                                                         |                                                                                                                                                 |          |                |                      |                                      |                      |
|----------------------------------------------------------------------------------------------------------------------------------------------------------------------------------------------------------------------------------------------------------------------------------------------------------------------------|------------------------------------------------------------------------------------------------------------------------------------------------------------------------------------------------------------------------------------------------------------------|------------------------------------|-----------------------------------------------------------------|-------------------------------------------------------------------------------------------------------------------------|-------------------------------------------------------------------------------------------------------------------------------------------------|----------|----------------|----------------------|--------------------------------------|----------------------|
| <p>114 Cavalheiro LV, Eid RA, Talerman C, Prado Cd, Gobbi FC, Andreoli PB. Design of an instrument to measure the quality of care in Physical Therapy. Einstein (Sao Paulo). 2015 Apr-Jun;13(2):260-8. doi: 0.1590/S1679-45082015GS3248. English, Portuguese. PubMed PMID: 26154548; PubMed Central PMCID: PMC4943820.</p> | <p><a href="http://www.scielo.br/scielo.php?script=sci_arttext&amp;pid=S1679-45082015000200016&amp;lng=en&amp;nrm=iso&amp;tlng=en">http://www.scielo.br/scielo.php?script=sci_arttext&amp;pid=S1679-45082015000200016&amp;lng=en&amp;nrm=iso&amp;tlng=en</a></p> | <p>Perception of dyspnea</p>       | <p>Total number of patients subjected to dyspnea evaluation</p> | <p>Total number of respiratory patients who reduce the score 2 points in the Borg scale from the initial evaluation</p> | <p>Percentage of patients with dyspnea in whom the score on the Borg scale has been reduced by 2 points compared to the initial evaluation.</p> | <p>5</p> | <p>Outcome</p> | <p>Pneumology CC</p> | <p>Inpatient and ambulatory care</p> | <p>Effectiveness</p> |
| <p>115 Cavalheiro LV, Eid RA, Talerman C, Prado Cd, Gobbi FC, Andreoli PB. Design of an instrument to measure the quality of care in Physical Therapy. Einstein (Sao Paulo). 2015 Apr-Jun;13(2):260-8. doi: 0.1590/S1679-45082015GS3248. English, Portuguese. PubMed PMID: 26154548; PubMed Central PMCID: PMC4943820.</p> | <p><a href="http://www.scielo.br/scielo.php?script=sci_arttext&amp;pid=S1679-45082015000200016&amp;lng=en&amp;nrm=iso&amp;tlng=en">http://www.scielo.br/scielo.php?script=sci_arttext&amp;pid=S1679-45082015000200016&amp;lng=en&amp;nrm=iso&amp;tlng=en</a></p> | <p>Spontaneous breathing trial</p> | <p>Total number of patients subjected to the SBT</p>            | <p>Total number of patients subjected to the SBT for over 2 hours</p>                                                   | <p>Percentage of patients undergoing the Spontaneous Breathing Test who undergo more than 2 hours.</p>                                          | <p>5</p> | <p>Process</p> | <p>Pneumology CC</p> | <p>Inpatient care</p>                | <p>Effectiveness</p> |

|                                                                                                                                                                                                                                                                                                                            |                                           |                                                                                              |                                                                                                                             |                                                                                                                                                              |          |                                |                        |                      |
|----------------------------------------------------------------------------------------------------------------------------------------------------------------------------------------------------------------------------------------------------------------------------------------------------------------------------|-------------------------------------------|----------------------------------------------------------------------------------------------|-----------------------------------------------------------------------------------------------------------------------------|--------------------------------------------------------------------------------------------------------------------------------------------------------------|----------|--------------------------------|------------------------|----------------------|
| <p>116 Cavalheiro LV, Eid RA, Talerman C, Prado Cd, Gobbi FC, Andreoli PB. Design of an instrument to measure the quality of care in Physical Therapy. Einstein (Sao Paulo). 2015 Apr-Jun;13(2):260-8. doi: 0.1590/S1679-45082015GS3248. English, Portuguese. PubMed PMID: 26154548; PubMed Central PMCID: PMC4943820.</p> | <p>Extubation failure</p>                 | <p>Total number of patients who passed the SBT and were extubated</p>                        | <p>Total number of patients intubated within 48 hours after extubation enrolled in the protocol</p>                         | <p>Percentage of patients who passed the Spontaneous Breathing Test and were extubated in those who had been intubated within 48 hours after extubation.</p> | <p>5</p> | <p>Outcome Pneumology CC</p>   | <p>Inpatient care</p>  | <p>Safety</p>        |
| <p>117 Cavalheiro LV, Eid RA, Talerman C, Prado Cd, Gobbi FC, Andreoli PB. Design of an instrument to measure the quality of care in Physical Therapy. Einstein (Sao Paulo). 2015 Apr-Jun;13(2):260-8. doi: 0.1590/S1679-45082015GS3248. English, Portuguese. PubMed PMID: 26154548; PubMed Central PMCID: PMC4943820.</p> | <p>Change in physical activity levels</p> | <p>Total number of individuals subjected to counseling and tracking of physical activity</p> | <p>Total number of individuals who changed their physical activity level (+1 point in the physical activity evaluation)</p> | <p>Percentage of patients undergoing counseling and monitoring of physical activity in whom their level of physical activity has been improved.</p>          | <p>5</p> | <p>Outcome all patients CC</p> | <p>Ambulatory care</p> | <p>Effectiveness</p> |

|                                                                                                                                                                                                                                                                                                                            |                                                                                                                                                                                                                                                                                                                                |                                                                          |                                                             |                                                                                                                        |          |                |                        |                                      |                      |
|----------------------------------------------------------------------------------------------------------------------------------------------------------------------------------------------------------------------------------------------------------------------------------------------------------------------------|--------------------------------------------------------------------------------------------------------------------------------------------------------------------------------------------------------------------------------------------------------------------------------------------------------------------------------|--------------------------------------------------------------------------|-------------------------------------------------------------|------------------------------------------------------------------------------------------------------------------------|----------|----------------|------------------------|--------------------------------------|----------------------|
| <p>118 Cavalheiro LV, Eid RA, Talerman C, Prado Cd, Gobbi FC, Andreoli PB. Design of an instrument to measure the quality of care in Physical Therapy. Einstein (Sao Paulo). 2015 Apr-Jun;13(2):260-8. doi: 0.1590/S1679-45082015GS3248. English, Portuguese. PubMed PMID: 26154548; PubMed Central PMCID: PMC4943820.</p> | <p><a href="http://www.scielo.br/scielo.php?script=sci_arttext&amp;pid=S1679-45082015000200016&amp;lng=en&amp;nrm=iso&amp;tlng=en">http://www.scielo.br/scielo.php?script=sci_arttext&amp;pid=S1679-45082015000200016&amp;lng=en&amp;nrm=iso&amp;tlng=en</a> Assess the adherence to physical therapy protocols</p>            | <p>Total number of patients who meet the protocol inclusion criteria</p> | <p>Total number of patients enrolled in the protocol</p>    | <p>Percentage of patients who meet inclusion criteria in a physiotherapy protocol that have finally been included.</p> | <p>5</p> | <p>Outcome</p> | <p>all patients CC</p> | <p>Inpatient and ambulatory care</p> | <p>Accessibility</p> |
| <p>119 Cavalheiro LV, Eid RA, Talerman C, Prado Cd, Gobbi FC, Andreoli PB. Design of an instrument to measure the quality of care in Physical Therapy. Einstein (Sao Paulo). 2015 Apr-Jun;13(2):260-8. doi: 0.1590/S1679-45082015GS3248. English, Portuguese. PubMed PMID: 26154548; PubMed Central PMCID: PMC4943820.</p> | <p><a href="http://www.scielo.br/scielo.php?script=sci_arttext&amp;pid=S1679-45082015000200016&amp;lng=en&amp;nrm=iso&amp;tlng=en">http://www.scielo.br/scielo.php?script=sci_arttext&amp;pid=S1679-45082015000200016&amp;lng=en&amp;nrm=iso&amp;tlng=en</a> Measure whether the prognostic treatment outcome was achieved</p> | <p>Total number of objectives proposed for each patient</p>              | <p>Total number of objectives achieved for each patient</p> | <p>Percentage of objectives proposed for each patient that have been achieved.</p>                                     | <p>5</p> | <p>Outcome</p> | <p>all patients CC</p> | <p>Inpatient and ambulatory care</p> | <p>Effectiveness</p> |

|                                                                                                                                                                                                                                                                                                                                         |                                                                                                                                  |                                                     |                                                                                   |                                                                                                                                                                                                                                                                                          |                                                                                                                                                                                                                                                      |          |                |                                                  |                                      |                      |
|-----------------------------------------------------------------------------------------------------------------------------------------------------------------------------------------------------------------------------------------------------------------------------------------------------------------------------------------|----------------------------------------------------------------------------------------------------------------------------------|-----------------------------------------------------|-----------------------------------------------------------------------------------|------------------------------------------------------------------------------------------------------------------------------------------------------------------------------------------------------------------------------------------------------------------------------------------|------------------------------------------------------------------------------------------------------------------------------------------------------------------------------------------------------------------------------------------------------|----------|----------------|--------------------------------------------------|--------------------------------------|----------------------|
| <p>120 Anger JT, Alas A, Litwin MS, Chu SD, Bresee C, Roth CP, Rashid R, Shekelle P, Wenger NS. The Quality of Care Provided to Women with Urinary Incontinence in 2 Clinical Settings. J Urol. 2016 Oct;196(4):1196-200. doi: 10.1016/j.juro.2016.05.005. Epub 2016 May 7. PubMed PMID: 27164512; PubMed Central PMCID: PMC5067158</p> | <p><a href="https://www.ncbi.nlm.nih.gov/pmc/articles/PMC5067158/">https://www.ncbi.nlm.nih.gov/pmc/articles/PMC5067158/</a></p> | <p>Diagnosis: Targeted Evaluation/Basic History</p> | <p>A woman presenting with complaints of new or worsening bothersome UI</p>       | <p>Should have a targeted history, including:<br/>a. Determining whether stress, urge, or both symptoms are present.<br/>b. Any previous pharmaceutical treatment.<br/>c. Lifestyle factors (fluid intake) if urge urinary incontinence (UUI) is present.<br/>d. Severity assessment</p> | <p>Percentage of women with urinary incontinence in whom a specific history has been completed, including the presence of stress or urgency, any previous pharmaceutical treatment, lifestyle factors (fluid intake) and evaluation of severity.</p> | <p>3</p> | <p>Process</p> | <p>Gynaecology / urology / proctology<br/>CC</p> | <p>Inpatient and ambulatory care</p> | <p>Effectiveness</p> |
| <p>121 Anger JT, Alas A, Litwin MS, Chu SD, Bresee C, Roth CP, Rashid R, Shekelle P, Wenger NS. The Quality of Care Provided to Women with Urinary Incontinence in 2 Clinical Settings. J Urol. 2016 Oct;196(4):1196-200. doi: 10.1016/j.juro.2016.05.005. Epub 2016 May 7. PubMed PMID: 27164512; PubMed Central PMCID: PMC5067158</p> | <p><a href="https://www.ncbi.nlm.nih.gov/pmc/articles/PMC5067158/">https://www.ncbi.nlm.nih.gov/pmc/articles/PMC5067158/</a></p> | <p>Targeted Physical Exam</p>                       | <p>A woman presenting with complaints of new/worsening bothersome UI symptoms</p> | <p>Should have a targeted physical exam, including: Vaginal exam to assess for contributors to UI (fibroids, pelvic organ prolapse), including assessment of pelvic floor muscle strength (ability to perform Kegel exercises).</p>                                                      | <p>Percentage of women who have urinary incontinence in which a specific physical examination has been performed. (vaginal examination and evaluation of pelvic floor strength)</p>                                                                  | <p>3</p> | <p>Process</p> | <p>Gynaecology / urology / proctology<br/>CC</p> | <p>Inpatient and ambulatory care</p> | <p>Effectiveness</p> |

|                                                                                                                                                                                                                                                                                                                                         |                                                                                                                                                                |                                                                 |                                                                         |                                                                                                                                                    |          |                |                                                  |                                      |                      |
|-----------------------------------------------------------------------------------------------------------------------------------------------------------------------------------------------------------------------------------------------------------------------------------------------------------------------------------------|----------------------------------------------------------------------------------------------------------------------------------------------------------------|-----------------------------------------------------------------|-------------------------------------------------------------------------|----------------------------------------------------------------------------------------------------------------------------------------------------|----------|----------------|--------------------------------------------------|--------------------------------------|----------------------|
| <p>122 Anger JT, Alas A, Litwin MS, Chu SD, Bresee C, Roth CP, Rashid R, Shekelle P, Wenger NS. The Quality of Care Provided to Women with Urinary Incontinence in 2 Clinical Settings. J Urol. 2016 Oct;196(4):1196-200. doi: 10.1016/j.juro.2016.05.005. Epub 2016 May 7. PubMed PMID: 27164512; PubMed Central PMCID: PMC5067158</p> | <p><a href="https://www.ncbi.nlm.nih.gov/pmc/articles/PMC5067158/">https://www.ncbi.nlm.nih.gov/pmc/articles/PMC5067158/</a> Treatment/Management UI</p>       | <p>A woman who presents with new or worsening bothersome UI</p> | <p>Should initially be offered pelvic floor muscle training (PFMT).</p> | <p>Percentage of women who report difficulty or worsening of urinary incontinence in which pelvic floor musculature training has been offered.</p> | <p>1</p> | <p>Process</p> | <p>Gynaecology / urology / proctology<br/>CC</p> | <p>Inpatient and ambulatory care</p> | <p>Effectiveness</p> |
| <p>123 Anger JT, Alas A, Litwin MS, Chu SD, Bresee C, Roth CP, Rashid R, Shekelle P, Wenger NS. The Quality of Care Provided to Women with Urinary Incontinence in 2 Clinical Settings. J Urol. 2016 Oct;196(4):1196-200. doi: 10.1016/j.juro.2016.05.005. Epub 2016 May 7. PubMed PMID: 27164512; PubMed Central PMCID: PMC5067158</p> | <p><a href="https://www.ncbi.nlm.nih.gov/pmc/articles/PMC5067158/">https://www.ncbi.nlm.nih.gov/pmc/articles/PMC5067158/</a> Treatment/Management of UUI 1</p> | <p>If a woman presents with new or worsening bothersome UUI</p> | <p>Then a history about fluid intake should be obtained</p>             | <p>Percentage of women who report difficulty or worsening of urge urinary incontinence in which a history of fluid intake has been completed.</p>  | <p>3</p> | <p>Process</p> | <p>Gynaecology / urology / proctology<br/>CC</p> | <p>Inpatient and ambulatory care</p> | <p>Effectiveness</p> |



|     |                                                                                                                                                                                                                                                                                                                              |                                                                                                                                                                                                                                                                                                                                     |                                         |                                                              |                                                                                                                                        |                                                                                                                                                                            |   |           |                                       |                               |               |
|-----|------------------------------------------------------------------------------------------------------------------------------------------------------------------------------------------------------------------------------------------------------------------------------------------------------------------------------|-------------------------------------------------------------------------------------------------------------------------------------------------------------------------------------------------------------------------------------------------------------------------------------------------------------------------------------|-----------------------------------------|--------------------------------------------------------------|----------------------------------------------------------------------------------------------------------------------------------------|----------------------------------------------------------------------------------------------------------------------------------------------------------------------------|---|-----------|---------------------------------------|-------------------------------|---------------|
| 124 | Anger JT, Alas A, Litwin MS, Chu SD, Bresee C, Roth CP, Rashid R, Shekelle P, Wenger NS. The Quality of Care Provided to Women with Urinary Incontinence in 2 Clinical Settings. J Urol. 2016 Oct;196(4):1196-200. doi: 10.1016/j.juro.2016.05.005. Epub 2016 May 7. PubMed PMID: 27164512; PubMed Central PMCID: PMC5067158 | <a href="https://www.ncbi.nlm.nih.gov/pmc/articles/PMC5067158/">https://www.ncbi.nlm.nih.gov/pmc/articles/PMC5067158/</a>                                                                                                                                                                                                           | Treatment/Management of UUI 2           | A woman presenting with new or worsening symptoms of UUI/OAB | Should initially be counseled about behavioral modification, including fluid restriction and bladder training.                         | Percentage of women with urge urinary incontinence or overactive bladder who have been advised on behavior modification, including fluid restriction and bladder training. | 1 | Process   | Gynaecology / urology / proctology CC | Inpatient and ambulatory care | Effectiveness |
| 125 | Quality Standards for Pulmonary Rehabilitation in Adults. MAY 2014 ISSN 2040-2023. BRITISH THORACIC SOCIETY REPORTS VOL. 6 NO. 2 2015                                                                                                                                                                                        | <a href="https://www.brit-thoracic.org.uk/document-library/quality-standards/pulmonary-rehabilitation/bts-quality-standards-for-pulmonary-rehabilitation-in-adults/">https://www.brit-thoracic.org.uk/document-library/quality-standards/pulmonary-rehabilitation/bts-quality-standards-for-pulmonary-rehabilitation-in-adults/</a> | Referral for pulmonary rehabilitation 1 |                                                              | Evidence that pulmonary rehabilitation programmes accept referral of patients who have previously undertaken pulmonary rehabilitation. | Evidence that pulmonary rehabilitation programs admit patients who have previously had pulmonary rehabilitation                                                            | 1 | Structure | Pneumology CC                         | Ambulatory care               | Equity        |

|     |                                                                                                                                       |                                                                                                                                                                                                                                                                                                                                     |                                                                                        |                                                               |                                                                                                                                                   |                                                                                                                                                                 |   |         |               |                 |                       |
|-----|---------------------------------------------------------------------------------------------------------------------------------------|-------------------------------------------------------------------------------------------------------------------------------------------------------------------------------------------------------------------------------------------------------------------------------------------------------------------------------------|----------------------------------------------------------------------------------------|---------------------------------------------------------------|---------------------------------------------------------------------------------------------------------------------------------------------------|-----------------------------------------------------------------------------------------------------------------------------------------------------------------|---|---------|---------------|-----------------|-----------------------|
| 126 | Quality Standards for Pulmonary Rehabilitation in Adults. MAY 2014 ISSN 2040-2023. BRITISH THORACIC SOCIETY REPORTS VOL. 6 NO. 2 2021 | <a href="https://www.brit-thoracic.org.uk/document-library/quality-standards/pulmonary-rehabilitation/bts-quality-standards-for-pulmonary-rehabilitation-in-adults/">https://www.brit-thoracic.org.uk/document-library/quality-standards/pulmonary-rehabilitation/bts-quality-standards-for-pulmonary-rehabilitation-in-adults/</a> | Tailored pulmonary rehabilitation programs 1                                           | Number of people enrolled onto pulmonary rehabilitation.      | Number of people receiving an individually prescribed and progressive aerobic exercise programme.                                                 | Percentage of patients enrolled in pulmonary rehabilitation who have received an individual and progressive aerobic exercise program.                           | 1 | Process | Pneumology CC | Ambulatory care | Effectiveness         |
| 127 | Quality Standards for Pulmonary Rehabilitation in Adults. MAY 2014 ISSN 2040-2023. BRITISH THORACIC SOCIETY REPORTS VOL. 6 NO. 2 2022 | <a href="https://www.brit-thoracic.org.uk/document-library/quality-standards/pulmonary-rehabilitation/bts-quality-standards-for-pulmonary-rehabilitation-in-adults/">https://www.brit-thoracic.org.uk/document-library/quality-standards/pulmonary-rehabilitation/bts-quality-standards-for-pulmonary-rehabilitation-in-adults/</a> | Tailored pulmonary rehabilitation programs 2                                           | Number of people enrolled onto pulmonary rehabilitation.      | Number of people receiving an individually prescribed and progressive resistance exercise programme                                               | Percentage of patients enrolled in pulmonary rehabilitation who have received an individual and progressive exercise program.                                   | 1 | Process | Pneumology CC | Ambulatory care | Effectiveness         |
| 128 | Quality Standards for Pulmonary Rehabilitation in Adults. MAY 2014 ISSN 2040-2023. BRITISH THORACIC SOCIETY REPORTS VOL. 6 NO. 2 2023 | <a href="https://www.brit-thoracic.org.uk/document-library/quality-standards/pulmonary-rehabilitation/bts-quality-standards-for-pulmonary-rehabilitation-in-adults/">https://www.brit-thoracic.org.uk/document-library/quality-standards/pulmonary-rehabilitation/bts-quality-standards-for-pulmonary-rehabilitation-in-adults/</a> | Pulmonary rehabilitation programmes include a defined, structured education programme. | The number of pulmonary rehabilitation programmes nationally. | Number of pulmonary rehabilitation programmes providing a structured education programme in line with the BTS Pulmonary Rehabilitation Guideline. | Percentage of pulmonary rehabilitation programs nationwide in which a structured education program has been offered, according to clinical practice guidelines. | 5 | Process | Pneumology CC | Ambulatory care | Patient-centered care |

|     |                                                                                                                                       |                                                                                                                                                                                                                                                                                                                                     |                                                                                                                                                                   |                                                                             |                                                                                                                                        |   |         |               |                 |               |
|-----|---------------------------------------------------------------------------------------------------------------------------------------|-------------------------------------------------------------------------------------------------------------------------------------------------------------------------------------------------------------------------------------------------------------------------------------------------------------------------------------|-------------------------------------------------------------------------------------------------------------------------------------------------------------------|-----------------------------------------------------------------------------|----------------------------------------------------------------------------------------------------------------------------------------|---|---------|---------------|-----------------|---------------|
| 129 | Quality Standards for Pulmonary Rehabilitation in Adults. MAY 2014 ISSN 2040-2023. BRITISH THORACIC SOCIETY REPORTS VOL. 6 NO. 2 2024 | <a href="https://www.brit-thoracic.org.uk/document-library/quality-standards/pulmonary-rehabilitation/bts-quality-standards-for-pulmonary-rehabilitation-in-adults/">https://www.brit-thoracic.org.uk/document-library/quality-standards/pulmonary-rehabilitation/bts-quality-standards-for-pulmonary-rehabilitation-in-adults/</a> | People completing pulmonary rehabilitation are provided with an individualised structured, written plan for ongoing exercise maintenance.                         | The total number of people completing pulmonary rehabilitation.             | The number of people completing pulmonary rehabilitation who have an individualised written exercise plan                              | 2 | Process | Pneumology CC | Ambulatory care | Effectiveness |
| 130 | Quality Standards for Pulmonary Rehabilitation in Adults. MAY 2014 ISSN 2040-2023. BRITISH THORACIC SOCIETY REPORTS VOL. 6 NO. 2 2025 | <a href="https://www.brit-thoracic.org.uk/document-library/quality-standards/pulmonary-rehabilitation/bts-quality-standards-for-pulmonary-rehabilitation-in-adults/">https://www.brit-thoracic.org.uk/document-library/quality-standards/pulmonary-rehabilitation/bts-quality-standards-for-pulmonary-rehabilitation-in-adults/</a> | People attending pulmonary rehabilitation have the outcome of treatment assessed using as a minimum, measures of exercise capacity, dyspnoea and health status. 1 | Number of people attending initial assessment for pulmonary rehabilitation. | Number of people completing assessments of health status, dyspnoea and exercise capacity at outset /initial assessment                 | 1 | Process | Pneumology CC | Ambulatory care | Effectiveness |
| 131 | Quality Standards for Pulmonary Rehabilitation in Adults. MAY 2014 ISSN 2040-2023. BRITISH THORACIC SOCIETY REPORTS VOL. 6 NO. 2 2026 | <a href="https://www.brit-thoracic.org.uk/document-library/quality-standards/pulmonary-rehabilitation/bts-quality-standards-for-pulmonary-rehabilitation-in-adults/">https://www.brit-thoracic.org.uk/document-library/quality-standards/pulmonary-rehabilitation/bts-quality-standards-for-pulmonary-rehabilitation-in-adults/</a> | People attending pulmonary rehabilitation have the outcome of treatment assessed using as a minimum, measures of exercise capacity, dyspnoea and health status. 2 | Number of people completing pulmonary rehabilitation.                       | Number of people completing assessments of health status, dyspnoea and exercise capacity after completion of pulmonary rehabilitation. | 1 | Process | Pneumology CC | Ambulatory care | Effectiveness |

|     |                                                                                                                                                                                                          |                                                                                                                                                                                                                                                                                                                                     |                                                                                                   |                                                       |                                                                                                                                                                                            |                                                                                                                                                                                                                                             |   |         |                 |                 |                       |
|-----|----------------------------------------------------------------------------------------------------------------------------------------------------------------------------------------------------------|-------------------------------------------------------------------------------------------------------------------------------------------------------------------------------------------------------------------------------------------------------------------------------------------------------------------------------------|---------------------------------------------------------------------------------------------------|-------------------------------------------------------|--------------------------------------------------------------------------------------------------------------------------------------------------------------------------------------------|---------------------------------------------------------------------------------------------------------------------------------------------------------------------------------------------------------------------------------------------|---|---------|-----------------|-----------------|-----------------------|
| 132 | Quality Standards for Pulmonary Rehabilitation in Adults. MAY 2014 ISSN 2040-2023. BRITISH THORACIC SOCIETY REPORTS VOL. 6 NO. 2 2028                                                                    | <a href="https://www.brit-thoracic.org.uk/document-library/quality-standards/pulmonary-rehabilitation/bts-quality-standards-for-pulmonary-rehabilitation-in-adults/">https://www.brit-thoracic.org.uk/document-library/quality-standards/pulmonary-rehabilitation/bts-quality-standards-for-pulmonary-rehabilitation-in-adults/</a> | Pulmonary rehabilitation programmes conduct an annual audit of individual outcomes and process. 2 | Number of people enrolled to pulmonary rehabilitation | Number of people completing pulmonary rehabilitation who achieve the minimum clinically important improvement in the chosen outcome measures                                               | Percentage of patients enrolled in pulmonary rehabilitation who complete the program and achieve minimal clinically important improvement on selected outcome measures.                                                                     | 5 | Outcome | Pneumology CC   | Ambulatory care | Effectiveness         |
| 133 | Petersson IF, Strömbeck B, Andersen L, et al. Development of healthcare quality indicators for rheumatoid arthritis in Europe: the eumusc.net project. Annals of the Rheumatic Diseases 2014;73:906-908. | <a href="https://ard.bmj.com/content/73/5/906">https://ard.bmj.com/content/73/5/906</a>                                                                                                                                                                                                                                             | HCQI RA 2                                                                                         | If a patient is newly diagnosed with RA,              | then, he or she should be given individually tailored education by relevant health professionals about the natural history, treatment, and self management of the disease within 3 months. | Percentage of patients with a new diagnosis of rheumatoid arthritis who have been provided with individualized education on the natural history of the disease, the treatment and self-management of the disease in the first three months. | 5 | Process | Rheumatology CC | Ambulatory care | Patient-centered care |
| 134 | Petersson IF, Strömbeck B, Andersen L, et al. Development of healthcare quality indicators for rheumatoid arthritis in Europe: the eumusc.net project. Annals of the Rheumatic Diseases 2014;73:906-908. | <a href="https://ard.bmj.com/content/73/5/907">https://ard.bmj.com/content/73/5/907</a>                                                                                                                                                                                                                                             | HCQI RA 7                                                                                         | If a patient has RA                                   | Then he/she should have a treatment plan developed between him/her and his/her clinician/ health professionals at each visit.                                                              | Percentage of patients with rheumatoid arthritis in whom a treatment plan has been developed between him and the physical therapist at each visit.                                                                                          | 5 | Process | Rheumatology CC | Ambulatory care | Patient-centered care |

|     |                                                                                                                                                                                                                 |                                                                                                                           |                                 |                                                                                                                           |                                                                                                                          |                                                                                                                                                                                                                        |   |         |                 |                 |                       |
|-----|-----------------------------------------------------------------------------------------------------------------------------------------------------------------------------------------------------------------|---------------------------------------------------------------------------------------------------------------------------|---------------------------------|---------------------------------------------------------------------------------------------------------------------------|--------------------------------------------------------------------------------------------------------------------------|------------------------------------------------------------------------------------------------------------------------------------------------------------------------------------------------------------------------|---|---------|-----------------|-----------------|-----------------------|
| 135 | Petersson IF, Strömbeck B, Andersen L, et al<br>Development of healthcare quality indicators for rheumatoid arthritis in Europe: the eumusc.net project<br>Annals of the Rheumatic Diseases<br>2014;73:906-908. | <a href="https://ard.bmj.com/content/73/5/909">https://ard.bmj.com/content/73/5/909</a>                                   | HCQI RA 13                      | If a patient is diagnosed with RA and reports difficulties in ambulatory and/or non ambulatory activities of daily living | Then the need of assistive devices, appropriate orthoses and environmental adaptations should be assessed and addressed. | Percentage of patients diagnosed with rheumatoid arthritis who report difficulties in activities of daily living in which assistive devices, orthoses and environmental adaptations have been evaluated and addressed. | 5 | Process | Rheumatology CC | Ambulatory care | Effectiveness         |
| 136 | Petersson IF, Strömbeck B, Andersen L, et al<br>Development of healthcare quality indicators for rheumatoid arthritis in Europe: the eumusc.net project<br>Annals of the Rheumatic Diseases<br>2014;73:906-908. | <a href="https://ard.bmj.com/content/73/5/910">https://ard.bmj.com/content/73/5/910</a>                                   | HCQI RA 14                      | If a patient is diagnosed with active RA (i.e. DAS* 28 over 3.2)                                                          | Then the disease activity should be low (i.e. DAS28 below 3.2) 6 months after treatment has started.                     | Percentage of patients with active rheumatoid arthritis in whom the activity of the disease has decreased 6 months after the start of treatment.                                                                       | 5 | Outcome | Rheumatology CC | Ambulatory care | Effectiveness         |
| 137 | Self-reported quality care for knee osteoarthritis: comparisons across Denmark, Norway, Portugal and the UK                                                                                                     | <a href="https://www.ncbi.nlm.nih.gov/pmc/articles/PMC4623369/">https://www.ncbi.nlm.nih.gov/pmc/articles/PMC4623369/</a> | Information about joint problem | If a patient is diagnosed with osteoarthritis                                                                             | Then must have been given information about osteoarthritis from a health professional                                    | Percentage of patients diagnosed with osteoarthritis who have received information about their disease.                                                                                                                | 5 | Process | Rheumatology CC | Ambulatory care | Patient-centered care |
| 138 | Self-reported quality care for knee osteoarthritis: comparisons across Denmark, Norway, Portugal and the UK                                                                                                     | <a href="https://www.ncbi.nlm.nih.gov/pmc/articles/PMC4623369/">https://www.ncbi.nlm.nih.gov/pmc/articles/PMC4623369/</a> | Information about treatment     | If a patient is diagnosed with osteoarthritis                                                                             | Then must have been given information about different treatment alternatives                                             | Percentage of patients diagnosed with osteoarthritis who have received information about the different treatment alternatives                                                                                          | 5 | Process | Rheumatology CC | Ambulatory care | Patient-centered care |

|     |                                                                                                             |                                                                                                                           |                                            |                                                                                       |                                                                                                                                     |                                                                                                                                                       |   |         |                 |                 |                       |
|-----|-------------------------------------------------------------------------------------------------------------|---------------------------------------------------------------------------------------------------------------------------|--------------------------------------------|---------------------------------------------------------------------------------------|-------------------------------------------------------------------------------------------------------------------------------------|-------------------------------------------------------------------------------------------------------------------------------------------------------|---|---------|-----------------|-----------------|-----------------------|
| 139 | Self-reported quality care for knee osteoarthritis: comparisons across Denmark, Norway, Portugal and the UK | <a href="https://www.ncbi.nlm.nih.gov/pmc/articles/PMC4623369/">https://www.ncbi.nlm.nih.gov/pmc/articles/PMC4623369/</a> | Advice on managing/living with OA          | If a patient is diagnosed with osteoarthritis                                         | Then must have been given information about how you can self-manage the disease                                                     | Percentage of patients diagnosed with osteoarthritis in whom information has been received on the self-management of the disease.                     | 5 | Process | Rheumatology CC | Ambulatory care | Patient-centered care |
| 140 | Self-reported quality care for knee osteoarthritis: comparisons across Denmark, Norway, Portugal and the UK | <a href="https://www.ncbi.nlm.nih.gov/pmc/articles/PMC4623369/">https://www.ncbi.nlm.nih.gov/pmc/articles/PMC4623369/</a> | Information about exercise                 | If a patient is diagnosed with osteoarthritis                                         | THEN must have been given information about the importance of physical activity and exercise                                        | Percentage of patients diagnosed with osteoarthritis in whom information has been received on the importance of physical activity and exercise.       | 5 | Process | Rheumatology CC | Ambulatory care | Patient-centered care |
| 141 | Self-reported quality care for knee osteoarthritis: comparisons across Denmark, Norway, Portugal and the UK | <a href="https://www.ncbi.nlm.nih.gov/pmc/articles/PMC4623369/">https://www.ncbi.nlm.nih.gov/pmc/articles/PMC4623369/</a> | Referred for physical activity             | If a patient is diagnosed with osteoarthritis                                         | THEN must have been referred or offered a referral to a health professional who can advise you about physical activity and exercise | Percentage of patients diagnosed with osteoarthritis who have been referred for advice on physical activity and exercise.                             | 5 | Process | Rheumatology CC | Ambulatory care | Patient-centered care |
| 142 | Self-reported quality care for knee osteoarthritis: comparisons across Denmark, Norway, Portugal and the UK | <a href="https://www.ncbi.nlm.nih.gov/pmc/articles/PMC4623369/">https://www.ncbi.nlm.nih.gov/pmc/articles/PMC4623369/</a> | Advised to lose weight                     | If a patient is diagnosed with osteoarthritis and is overweight                       | THEN must have been advised to lose weight, if you are overweight                                                                   | Percentage of overweight osteoarthritis patients who have been advised to lose weight.                                                                | 5 | Process | Rheumatology CC | Ambulatory care | Patient-centered care |
| 143 | Self-reported quality care for knee osteoarthritis: comparisons across Denmark, Norway, Portugal and the UK | <a href="https://www.ncbi.nlm.nih.gov/pmc/articles/PMC4623369/">https://www.ncbi.nlm.nih.gov/pmc/articles/PMC4623369/</a> | Assessment of problems in daily activities | If a patient is diagnosed with osteoarthritis and have problems with daily activities | THEN must have had these problems been assessed by a health professional                                                            | Percentage of patients diagnosed with osteoarthritis and who have problems in activities of daily living in which these problems have been evaluated. | 5 | Process | Rheumatology CC | Ambulatory care | Effectiveness         |
| 144 | Self-reported quality care for knee osteoarthritis: comparisons across Denmark, Norway, Portugal and the UK | <a href="https://www.ncbi.nlm.nih.gov/pmc/articles/PMC4623369/">https://www.ncbi.nlm.nih.gov/pmc/articles/PMC4623369/</a> | Assessed for walking aid                   | If a patient is diagnosed with osteoarthritis and have problems with walking          | THEN aid for walking must be assessed                                                                                               | Percentage of patients diagnosed with osteoarthritis and who have walking problems in which the need for technical walking aids has been evaluated.   | 5 | Process | Rheumatology CC | Ambulatory care | Effectiveness         |

|     |                                                                                                                                          |                                                                                                                                                                                                                                                                                                                                                                                                                                                                   |                                                                                                                                                             |                                                                                                                                                                                                                          |                                                                                                                                                                            |                                                                                                                                                                                                 |   |         |                    |                               |               |
|-----|------------------------------------------------------------------------------------------------------------------------------------------|-------------------------------------------------------------------------------------------------------------------------------------------------------------------------------------------------------------------------------------------------------------------------------------------------------------------------------------------------------------------------------------------------------------------------------------------------------------------|-------------------------------------------------------------------------------------------------------------------------------------------------------------|--------------------------------------------------------------------------------------------------------------------------------------------------------------------------------------------------------------------------|----------------------------------------------------------------------------------------------------------------------------------------------------------------------------|-------------------------------------------------------------------------------------------------------------------------------------------------------------------------------------------------|---|---------|--------------------|-------------------------------|---------------|
| 145 | Self-reported quality care for knee osteoarthritis: comparisons across Denmark, Norway, Portugal and the UK                              | <a href="https://www.ncbi.nlm.nih.gov/pmc/articles/PMC4623369/">https://www.ncbi.nlm.nih.gov/pmc/articles/PMC4623369/</a>                                                                                                                                                                                                                                                                                                                                         | Assessment of pain                                                                                                                                          | If a patient is diagnosed with osteoarthritis and have pain                                                                                                                                                              | THEN must have been assessed for joint pain by a health professional                                                                                                       | Percentage of patients diagnosed with osteoarthritis and who have pain in whom joint pain has been evaluated.                                                                                   | 5 | Process | Rheumatology CC    | Ambulatory care               | Effectiveness |
| 146 | AHRQ QI™ ICD-10-CM/PCS Specification v2019. PSI 08 In Hospital Fall with Hip Fracture Rate. Available at: www.qualityindicators.ahrq.gov | <a href="https://www.qualityindicators.ahrq.gov/Modules/PSI_TechSpec_ICD10_v2019.aspx">https://www.qualityindicators.ahrq.gov/Modules/PSI_TechSpec_ICD10_v2019.aspx</a>                                                                                                                                                                                                                                                                                           | Patient Safety Indicator 08 (PSI 08) In Hospital Fall with Hip Fracture Rate                                                                                | Discharges, ages 18 years and older, in a medical DRG (Appendix C: MEDIC2R) or in a surgical DRG (Appendix E: SURGI2R), with any listed ICD-10-PCS procedure codes for an operating room procedure (Appendix A: ORPROC). | Discharges, among cases meeting the inclusion and exclusion rules for the denominator, with any secondary ICD-10-CM diagnosis codes for hip fracture (HIPFXID*).           | Percentage of discharges, from 18 years of age, with surgical intervention in which there has been a fall with hip fracture during their stay.                                                  | 3 | Outcome | Other Surgeries CC | Inpatient and ambulatory care | Safety        |
| 147 | AHRQ QI™ ICD-10-CM/PCS Specification v2019. PSI 08 In Hospital Fall with Hip Fracture Rate. Available at: www.qualityindicators.ahrq.gov | <a href="https://data.gov.uk/dataset/380b1301-ee8f-450a-9bf6-62a8a81286b5/proportion-of-older-people-65-and-over-who-were-still-at-home-91-days-after-discharge-from-hospital-into-reablement-rehabilitation-services-nhs-of-3-6-i">https://data.gov.uk/dataset/380b1301-ee8f-450a-9bf6-62a8a81286b5/proportion-of-older-people-65-and-over-who-were-still-at-home-91-days-after-discharge-from-hospital-into-reablement-rehabilitation-services-nhs-of-3-6-i</a> | Proportion of older people (65 and over) who were still at home 91 days after discharge from hospital into reablement/rehabilitation services (NHSOF 3.6.i) | Older people (aged 65 and over)                                                                                                                                                                                          | Who, after a period of reablement/rehabilitation, maintain their independence by remaining or returning to their home or previous residence 91 days after leaving hospital | Percentage of elderly people in whom, after a period of rehabilitation, independence has been preserved by staying or returning to their home or residence, 91 days after leaving the hospital. | 5 | Outcome | Geriatric CC       | Inpatient and ambulatory care | Effectiveness |
| 148 | AHRQ QI™ ICD-10-CM/PCS Specification v2019. PSI 08 In Hospital Fall with Hip Fracture Rate. Available at: www.qualityindicators.ahrq.gov | <a href="http://data.gov.uk/dataset/66928b05-33d4-4273-8156-908891c01ec2">http://data.gov.uk/dataset/66928b05-33d4-4273-8156-908891c01ec2</a>                                                                                                                                                                                                                                                                                                                     | Proportion of older people (65 and over) who were offered rehabilitation following discharge from acute or community hospital (NHSOF 3.6.ii)                | Older people (aged 65 and over)                                                                                                                                                                                          | Who are offered reablement services when they leave hospital                                                                                                               | Percentage of the elderly in whom rehabilitation services have been offered after discharge from hospital.                                                                                      | 5 | Process | Geriatric CC       | Ambulatory care               | Accessibility |

|     |                  |                                                                                                                                                     |                                                                           |                                                                                                                              |                                                                                                                                                                                                               |                                                                                                                                                                                                                                                             |   |         |                                      |                |               |
|-----|------------------|-----------------------------------------------------------------------------------------------------------------------------------------------------|---------------------------------------------------------------------------|------------------------------------------------------------------------------------------------------------------------------|---------------------------------------------------------------------------------------------------------------------------------------------------------------------------------------------------------------|-------------------------------------------------------------------------------------------------------------------------------------------------------------------------------------------------------------------------------------------------------------|---|---------|--------------------------------------|----------------|---------------|
| 149 | Joint Commission | <a href="https://manual.jointcommission.org/releases/TJC2019A1/MIF0287.html">https://manual.jointcommission.org/releases/TJC2019A1/MIF0287.html</a> | Modified Rankin Score (mRS at 90 Days) - CSTK-02                          | Ischemic stroke patients treated with IV or IA alteplase therapy or who undergo mechanical endovascular reperfusion therapy. | Ischemic stroke patients whom a 90 day ( $\geq 75$ days and $\leq 105$ days) mRS is obtained via telephone or in-person                                                                                       | Percentage of patients with ischemic stroke, treated with thrombolytic therapy or mechanical endovascular reperfusion, who obtained a score of disability or dependency in daily activities with the Modified Rankin Score at 90 days.                      | 5 | Process | Cardiology and circulatory system CC | Inpatient care | Effectiveness |
| 150 | Joint Commission | <a href="https://manual.jointcommission.org/releases/TJC2019A1/MIF0388.html">https://manual.jointcommission.org/releases/TJC2019A1/MIF0388.html</a> | Modified Rankin Score (mRS at 90 Days: Favorable Outcome) - CSTK-10       | Ischemic stroke patients treated with IV or IA alteplase therapy or who undergo mechanical endovascular reperfusion therapy. | Ischemic stroke patients with a mRS less than or equal to 2 at 90 days ( $\geq 75$ days and $\leq 105$ days)                                                                                                  | Percentage of patients with ischemic stroke, treated with thrombolytic therapy or mechanical endovascular reperfusion, in whom a score of disability or dependency in daily activities was obtained with a Modified Rankin Score of less than 2 at 90 days. | 5 | Outcome | Cardiology and circulatory system CC | Inpatient care | Effectiveness |
| 151 | Joint Commission | <a href="https://manual.jointcommission.org/releases/TJC2019A1/MIF0357.html">https://manual.jointcommission.org/releases/TJC2019A1/MIF0357.html</a> | Postoperative Ambulation on Day of Surgery - THKR-IP-2 //THKR-OP-2        | Patients undergoing a total hip or total knee replacement.                                                                   | Patients undergoing total hip or total knee replacement who ambulated postoperatively the day of surgery or ambulated in the Post-Anesthesia Care Unit (PACU) or within 4 hours of discharge from the PACU.   | Percentage of patients who underwent total hip or knee prostheses who were walked on the day of the operation or in the post-anesthesia resuscitation unit.                                                                                                 | 1 | Process | Musculoskeletal CC                   | Inpatient care | Effectiveness |
| 152 | Joint Commission | <a href="https://manual.jointcommission.org/releases/TJC2019A1/MIF0365.html">https://manual.jointcommission.org/releases/TJC2019A1/MIF0365.html</a> | Preoperative Functional/Health Status Assessment - THKR-IP-4 // THKR-OP-4 | Patients undergoing total hip or total knee replacement.                                                                     | Percentage of patients who completed the general health (VR-12 or PROMIS-Global) AND joint specific functional status assessments (HOOS Jr./subscales or KOOS Jr./subscales) within 90 days prior to surgery. | Percentage of total hip or knee prosthesis patients in whom the general health status and specific functional condition of the joints have been evaluated within 90 days prior to surgery                                                                   | 5 | Process | Musculoskeletal CC                   | Inpatient care | Effectiveness |



|                                                                                         |                                                    |                                                                                                                                                                                                                                                                                        |                                                                                                                                                                                                                                                                                                                                                                                                                                                                                                                                                                                                                                                                                                                                                                                                                            |                                                                                                                                                                                                       |                                 |                               |               |
|-----------------------------------------------------------------------------------------|----------------------------------------------------|----------------------------------------------------------------------------------------------------------------------------------------------------------------------------------------------------------------------------------------------------------------------------------------|----------------------------------------------------------------------------------------------------------------------------------------------------------------------------------------------------------------------------------------------------------------------------------------------------------------------------------------------------------------------------------------------------------------------------------------------------------------------------------------------------------------------------------------------------------------------------------------------------------------------------------------------------------------------------------------------------------------------------------------------------------------------------------------------------------------------------|-------------------------------------------------------------------------------------------------------------------------------------------------------------------------------------------------------|---------------------------------|-------------------------------|---------------|
| <a href="http://www.qualityforum.org/QPS/0429">http://www.qualityforum.org/QPS/0429</a> | Change in Basic Mobility as Measured by the AM-PAC | All patients in a risk adjusted diagnostic category with a mobility goal for an episode of care. Cases to be included in the denominator could be identified based on ICD-9 codes or alternatively, based on CPT codes relevant to treatment goals focused on Basic Mobility function. | The number (or proportion) of a clinician's patients in a particular risk adjusted diagnostic category who meet a target threshold of improvement in Basic Mobility functioning. We recommend that the target threshold is based on the percentage of patients who exceed one or more Minimal Detectable Change (MDC) thresholds. The percentage threshold is derived from a normative database used for benchmarking. MDC is considered the minimal amount of change that is not likely to be due to measurement error. It is one of the more common change indices, which can be used to identify reliable changes in an outcome like Basic Mobility function adjusting for the amount of measurement error inherent in the measurement. MDC can be reported at different confidence levels. (see Haley & Fragala, 2006) | Percentage of patients in a risk diagnostic category who have a mobility objective, where an improvement in mobility has been achieved above a target threshold (based on minimum detectable change). | 5<br>Outcome<br>all patients CC | Inpatient and ambulatory care | Effectiveness |
|-----------------------------------------------------------------------------------------|----------------------------------------------------|----------------------------------------------------------------------------------------------------------------------------------------------------------------------------------------------------------------------------------------------------------------------------------------|----------------------------------------------------------------------------------------------------------------------------------------------------------------------------------------------------------------------------------------------------------------------------------------------------------------------------------------------------------------------------------------------------------------------------------------------------------------------------------------------------------------------------------------------------------------------------------------------------------------------------------------------------------------------------------------------------------------------------------------------------------------------------------------------------------------------------|-------------------------------------------------------------------------------------------------------------------------------------------------------------------------------------------------------|---------------------------------|-------------------------------|---------------|

|                                                                                         |                                                                    |                                                                                                                                                                                                                                                                                                     |                                                                                                                                                                                                                                                                                                                                                                                                                                                                                                                                                                                                                                                                                                                                                                                                                                                            |                                                                                                                                                                                                                                      |   |                                |                                      |                      |
|-----------------------------------------------------------------------------------------|--------------------------------------------------------------------|-----------------------------------------------------------------------------------------------------------------------------------------------------------------------------------------------------------------------------------------------------------------------------------------------------|------------------------------------------------------------------------------------------------------------------------------------------------------------------------------------------------------------------------------------------------------------------------------------------------------------------------------------------------------------------------------------------------------------------------------------------------------------------------------------------------------------------------------------------------------------------------------------------------------------------------------------------------------------------------------------------------------------------------------------------------------------------------------------------------------------------------------------------------------------|--------------------------------------------------------------------------------------------------------------------------------------------------------------------------------------------------------------------------------------|---|--------------------------------|--------------------------------------|----------------------|
| <a href="http://www.qualityforum.org/QPS/0430">http://www.qualityforum.org/QPS/0430</a> | <p>Change in Daily Activity Function as Measured by the AM-PAC</p> | <p>All patients in a risk adjusted diagnostic category with a Daily Activity goal for an episode of care. Cases to be included in the denominator could be identified based on ICD-9 codes or alternatively, based on CPT codes relevant to treatment goals focused on Daily Activity function.</p> | <p>The number (or proportion) of a clinician's patients in a particular risk adjusted diagnostic category who meet a target threshold of improvement in Daily Activity (i.e., ADL and IADL) functioning. We recommend that the target threshold is based on the percentage of patients who exceed one or more Minimal Detectable Change (MDC) thresholds. The percentage threshold is derived from a normative database used for benchmarking. MDC is considered the minimal amount of change that is not likely to be due to measurement error. It is one of the more common change indices, which can be used to identify reliable changes in an outcome like Daily Activity function adjusting for the amount of measurement error inherent in the measurement. MDC can be reported at different confidence levels (see Haley &amp; Fragala, 2006).</p> | <p>Percentage of patients in a risk diagnostic category who have a goal of daily life activities, where an improvement in daily life activities has been achieved above a target threshold (based on minimal detectable change).</p> | 5 | <p>Outcome all patients CC</p> | <p>Inpatient and ambulatory care</p> | <p>Effectiveness</p> |
|-----------------------------------------------------------------------------------------|--------------------------------------------------------------------|-----------------------------------------------------------------------------------------------------------------------------------------------------------------------------------------------------------------------------------------------------------------------------------------------------|------------------------------------------------------------------------------------------------------------------------------------------------------------------------------------------------------------------------------------------------------------------------------------------------------------------------------------------------------------------------------------------------------------------------------------------------------------------------------------------------------------------------------------------------------------------------------------------------------------------------------------------------------------------------------------------------------------------------------------------------------------------------------------------------------------------------------------------------------------|--------------------------------------------------------------------------------------------------------------------------------------------------------------------------------------------------------------------------------------|---|--------------------------------|--------------------------------------|----------------------|

<http://www.qualityforum.org/QPS/2502>

|                                                                                                                    |                                                                                                                                                                                                                                                                                                                                                                                                                                                                                                                                                      |                                                                                                                                                                                                                                                                                                                                                                                                                                                                                                                                                                                                                                                                                               |                                                                                                                    |   |         |                 |                |               |
|--------------------------------------------------------------------------------------------------------------------|------------------------------------------------------------------------------------------------------------------------------------------------------------------------------------------------------------------------------------------------------------------------------------------------------------------------------------------------------------------------------------------------------------------------------------------------------------------------------------------------------------------------------------------------------|-----------------------------------------------------------------------------------------------------------------------------------------------------------------------------------------------------------------------------------------------------------------------------------------------------------------------------------------------------------------------------------------------------------------------------------------------------------------------------------------------------------------------------------------------------------------------------------------------------------------------------------------------------------------------------------------------|--------------------------------------------------------------------------------------------------------------------|---|---------|-----------------|----------------|---------------|
| All-Cause Unplanned Readmission Measure for 30 Days Post Discharge from Inpatient Rehabilitation Facilities (IRFs) | The denominator is computed with the same model used for the numerator. It is the model developed using all non-excluded IRF stays in the national data. For a particular facility the model is applied to the patient population, but the facility effect term is 0. In effect, it is the number of readmissions that would be expected for that patient population at the average IRF. The measure includes all the IRF stays in the measurement period that are observed in national Medicare FFS data and do not fall into an excluded category. | The numerator is mathematically related to the number of patients in the target population who have the event of an unplanned readmission in the 30- day post-discharge window. The measure does not have a simple form for the numerator and denominator—that is, the risk adjustment method used does not make the observed number of readmissions the numerator and a predicted number the denominator. Instead, the numerator is the risk-adjusted estimate of the number of unplanned readmissions that occurred within 30 days from discharge. This estimate includes risk adjustment for patient characteristics and a statistical estimate of the facility effect beyond patient mix. | Adjusted rate of patients with unscheduled readmission up to 30 days after discharge from rehabilitation services. | 3 | Outcome | all patients CC | Inpatient care | Effectiveness |
|--------------------------------------------------------------------------------------------------------------------|------------------------------------------------------------------------------------------------------------------------------------------------------------------------------------------------------------------------------------------------------------------------------------------------------------------------------------------------------------------------------------------------------------------------------------------------------------------------------------------------------------------------------------------------------|-----------------------------------------------------------------------------------------------------------------------------------------------------------------------------------------------------------------------------------------------------------------------------------------------------------------------------------------------------------------------------------------------------------------------------------------------------------------------------------------------------------------------------------------------------------------------------------------------------------------------------------------------------------------------------------------------|--------------------------------------------------------------------------------------------------------------------|---|---------|-----------------|----------------|---------------|

|         |                                                                                         |                                                                                              |                                                                                                                                                                                                                                                                                                                                                                                                                                                                                                                                                                                                                                                                      |                                                                                                                                                                                                                                                                                                                                                       |                                                                                                                                                               |   |         |                 |                               |               |
|---------|-----------------------------------------------------------------------------------------|----------------------------------------------------------------------------------------------|----------------------------------------------------------------------------------------------------------------------------------------------------------------------------------------------------------------------------------------------------------------------------------------------------------------------------------------------------------------------------------------------------------------------------------------------------------------------------------------------------------------------------------------------------------------------------------------------------------------------------------------------------------------------|-------------------------------------------------------------------------------------------------------------------------------------------------------------------------------------------------------------------------------------------------------------------------------------------------------------------------------------------------------|---------------------------------------------------------------------------------------------------------------------------------------------------------------|---|---------|-----------------|-------------------------------|---------------|
| 156 NQF | <a href="http://www.qualityforum.org/QPS/3479">http://www.qualityforum.org/QPS/3479</a> | Discharge to Community-Post Acute Care Measure for Inpatient Rehabilitation Facilities (IRF) | The measure denominator is the risk-adjusted expected number of discharges to community. This estimate includes risk-adjustment for patient characteristics with the facility effect removed. The "expected" number of discharges to community is the predicted number of risk-adjusted discharges to community if the same patients were treated at the average facility. The logistic regression model used to calculate the denominator is developed using all non-excluded facility stays in the national data. The denominator is computed in the same way as the numerator, but the facility effect is set at the average. (Ver definición completa en enlace) | The measure numerator is the risk-adjusted predicted estimate of the number of patients who are discharged to the community, and do not have an unplanned readmission to an acute care hospital or LTCH in the 31-day post-discharge observation window, and who remain alive during the post-discharge observation window. (Ver definición completa) | Adjusted rate of patients discharged from the community and who do not have readmission or death, up to 30 days after discharge from rehabilitation services. | 4 | Outcome | all patients CC | Inpatient care                | Effectiveness |
| 157 NQF | <a href="http://www.qualityforum.org/QPS/0202">http://www.qualityforum.org/QPS/0202</a> | Falls with injury                                                                            | Denominator Statement: Patient days by Type of Unit during the calendar month.                                                                                                                                                                                                                                                                                                                                                                                                                                                                                                                                                                                       | Total number of patient falls of injury level minor or greater (whether or not assisted by a staff member) by eligible hospital unit during the calendar month X 1000.                                                                                                                                                                                | Fall rate with injury per 1000 patient days.                                                                                                                  | 3 | Outcome | all patients CC | Inpatient and ambulatory care | Safety        |

|         |                                                                                         |                                                                                |                                                                                                                                                                                                                                                                                                                                                                                                         |                                                                                                                                                                                                                                                                                                                                                                                                                                 |                                                                                                                                                                                                                                                                                                                                                                                                                                                                           |   |         |                 |                               |               |
|---------|-----------------------------------------------------------------------------------------|--------------------------------------------------------------------------------|---------------------------------------------------------------------------------------------------------------------------------------------------------------------------------------------------------------------------------------------------------------------------------------------------------------------------------------------------------------------------------------------------------|---------------------------------------------------------------------------------------------------------------------------------------------------------------------------------------------------------------------------------------------------------------------------------------------------------------------------------------------------------------------------------------------------------------------------------|---------------------------------------------------------------------------------------------------------------------------------------------------------------------------------------------------------------------------------------------------------------------------------------------------------------------------------------------------------------------------------------------------------------------------------------------------------------------------|---|---------|-----------------|-------------------------------|---------------|
| 158 NQF | <a href="http://www.qualityforum.org/QPS/0101">http://www.qualityforum.org/QPS/0101</a> | Falls: Screening, Risk-Assessment, and Plan of Care to Prevent Future Falls    | A) Screening for Future Fall Risk: All patients aged 65 years and older seen by an eligible provider in the past year.<br>B & C) Falls Risk Assessment & Plan of Care for Falls: All patients aged 65 years and older seen by an eligible provider in the past year with a history of falls (history of falls is defined as 2 or more falls in the past year or any fall with injury in the past year). | This measure has three rates. The numerators for the three rates are as follows:<br>A) Screening for Future Fall Risk: Patients who were screened for future fall* risk** at last once within 12 months<br>B) Falls Risk Assessment: Patients who had a risk assessment*** for falls completed within 12 months<br>C) Plan of Care for Falls: Patients with a plan of care**** for falls documented within 12 months.           | Composite indicator: A) Percentage of patients over 65 years who undergo falls screening once a year. B) Percentage of patients older than 65 years with a history of falls (2 or more, or 1 with injury, in the last year) in whom fall risk assessment is performed once a year. C) Percentage of patients older than 65 years with a history of falls (2 or more, or 1 with injury, in the last year) who have documented a treatment plan for falls during that year. | 2 | Process | Geriatric CC    | Ambulatory care               | Safety        |
| 159 NQF | <a href="http://www.qualityforum.org/QPS/0701">http://www.qualityforum.org/QPS/0701</a> | Functional Capacity in COPD patients before and after Pulmonary Rehabilitation | All patients with clinician diagnosed COPD at PR program entry who completed PR during the measurement period and who completed at least 10 PR sessions within 3 months of PR program entry.                                                                                                                                                                                                            | Number of patients who are found to increase their functional capacity by at least 25 meters (82 feet), as measured by 6MWT distance at PR program entry and completion.                                                                                                                                                                                                                                                        | Percentage of COPD patients who completed a Pulmonary Rehabilitation program, with at least a minimum number of sessions, who found an improvement in functional capacity of at least 25 meters in the 6-minute walk test.                                                                                                                                                                                                                                                | 1 | Outcome | Pneumology CC   | Ambulatory care               | Effectiveness |
| 160 NQF | <a href="http://www.qualityforum.org/QPS/2321">http://www.qualityforum.org/QPS/2321</a> | Functional Change: Change in Mobility Score                                    | Facility adjusted adjusted expected change in rasch derived values, adjusted at the Case Mix Group level.                                                                                                                                                                                                                                                                                               | Average change in rasch derived mobility functional score from admission to discharge at the facility level. Includes the following FIM items: Transfer Bed/Chair/Wheelchair, Transfer Toilet, Locomotion and Stairs. Average is calculated as (sum of change at the patient level/total number of patients). Cases aged less than 18 years at admission to the facility or patients who died within the facility are excluded. | Ratio of change in mobility observed versus change in mobility expected for the hospital and patient group.                                                                                                                                                                                                                                                                                                                                                               | 4 | Outcome | all patients CC | Inpatient and ambulatory care | Effectiveness |

|         |                                                                                       |                                              |                                                                                                  |                                                                                                                                                                                                                                                                                                                                                                                                                             |                                                                                                                             |   |         |                 |                               |               |
|---------|---------------------------------------------------------------------------------------|----------------------------------------------|--------------------------------------------------------------------------------------------------|-----------------------------------------------------------------------------------------------------------------------------------------------------------------------------------------------------------------------------------------------------------------------------------------------------------------------------------------------------------------------------------------------------------------------------|-----------------------------------------------------------------------------------------------------------------------------|---|---------|-----------------|-------------------------------|---------------|
| 161 NQF | <a href="http://www.qualityforum.org/QPS/287">http://www.qualityforum.org/QPS/287</a> | Functional Change: Change in Motor Score     | Facility adjusted expected change in rasch derived values, adjusted at the Case Mix Group level. | Average change in rasch derived motor functional score from admission to discharge at the facility level. Average is calculated as (sum of change at the patient level/total number of patients). Cases aged less than 18 years at admission to the IRF or patients who died within the IRF are excluded.                                                                                                                   | Ratio of change in motor function observed versus change in motor function expected for the hospital and patient group.     | 4 | Outcome | all patients CC | Inpatient and ambulatory care | Effectiveness |
| 162 NQF | <a href="http://www.qualityforum.org/QPS/286">http://www.qualityforum.org/QPS/286</a> | Functional Change: Change in Self Care Score | Facility adjusted expected change in rasch derived values, adjusted at the Case Mix Group level. | Average change in rasch derived self-care functional score from admission to discharge at the facility level, including items: Feeding, Grooming, Dressing Upper Body, Dressing Lower Body, Toileting, Bowel, Expression, and Memory. Average is calculated as: (sum of change at the patient level for all items (Feeding, Grooming, Dressing Upper Body, Dressing Lower Body, Toileting, Bowel, Expression, and Memory) / | Ratio of change in observed functional state versus change in expected functional state for the hospital and patient group. | 4 | Outcome | all patients CC | Inpatient and ambulatory care | Effectiveness |

|         |                                                                                         |                                                                              |                                                                                                                                                                                  |                                                                                                                                                                                              |                                                                                                                                                                                                                                                            |   |         |                    |                               |               |
|---------|-----------------------------------------------------------------------------------------|------------------------------------------------------------------------------|----------------------------------------------------------------------------------------------------------------------------------------------------------------------------------|----------------------------------------------------------------------------------------------------------------------------------------------------------------------------------------------|------------------------------------------------------------------------------------------------------------------------------------------------------------------------------------------------------------------------------------------------------------|---|---------|--------------------|-------------------------------|---------------|
| 163 NQF | <a href="http://www.qualityforum.org/QPS/0427">http://www.qualityforum.org/QPS/0427</a> | Functional status change for patients with elbow, wrist and hand impairments | All patients 14 years and older with elbow, wrist or hand impairments who have initiated rehabilitation treatment and completed the FOTO (elbow, wrist and hand) PROM.           | Patient Level: The residual functional status score for the individual patient (residual scores are the actual change scores - predicted change after risk adjustment).                      | Rate of change in functional status in patients over 14 years of age with disabilities in the elbow, wrist or hand who have started a rehabilitation treatment in which the functional status was scored at the beginning and at the end of the treatment. | 5 | Outcome | Musculoskeletal CC | Inpatient and ambulatory care | Effectiveness |
|         |                                                                                         |                                                                              |                                                                                                                                                                                  | Individual Clinician Level: The average of residuals in functional status scores in patients who were treated by a clinician in a 12 month time period for elbow, wrist and hand impairment. |                                                                                                                                                                                                                                                            |   |         |                    |                               |               |
|         |                                                                                         |                                                                              |                                                                                                                                                                                  | Clinic Level: The average of residuals in functional status scores in patients who were treated by a clinic in a 12 month time period for elbow, wrist and hand impairments.                 |                                                                                                                                                                                                                                                            |   |         |                    |                               |               |
| 164 NQF | <a href="http://www.qualityforum.org/QPS/0424">http://www.qualityforum.org/QPS/0424</a> | Functional status change for patients with Foot and Ankle impairments        | All patients 14 years and older with foot or ankle impairments who have initiated rehabilitation treatment and completed the FOTO foot and ankle PROM at admission and discharge | Patient Level: The residual functional status score for the individual patient (residual scores are the actual change scores - predicted change after risk adjustment)                       | Rate of change in functional status in patients over 14 years of age with foot or ankle disabilities who have started rehabilitation treatment in which functional status was scored at the beginning and at the end of treatment.                         | 5 | Outcome | Musculoskeletal CC | Inpatient and ambulatory care | Effectiveness |
|         |                                                                                         |                                                                              |                                                                                                                                                                                  | Individual Clinician Level: The average of residuals in functional status scores in patients who were treated by a clinician in a 12 month time period for foot and or ankle impairment.     |                                                                                                                                                                                                                                                            |   |         |                    |                               |               |
|         |                                                                                         |                                                                              |                                                                                                                                                                                  | Clinic Level: The average of residuals in patients who were treated by a clinic in a 12 month time period for foot and or ankle impairment.                                                  |                                                                                                                                                                                                                                                            |   |         |                    |                               |               |

|         |                                                                                         |                                                                            |                                                                                                                                                                     |                                                                                                                                                                                                                                                                                                                                                                                                                                                                                                                                                                   |                                                                                                                                                                                                                                      |   |         |                    |                               |               |
|---------|-----------------------------------------------------------------------------------------|----------------------------------------------------------------------------|---------------------------------------------------------------------------------------------------------------------------------------------------------------------|-------------------------------------------------------------------------------------------------------------------------------------------------------------------------------------------------------------------------------------------------------------------------------------------------------------------------------------------------------------------------------------------------------------------------------------------------------------------------------------------------------------------------------------------------------------------|--------------------------------------------------------------------------------------------------------------------------------------------------------------------------------------------------------------------------------------|---|---------|--------------------|-------------------------------|---------------|
| 165 NQF | <a href="http://www.qualityforum.org/QPS/0428">http://www.qualityforum.org/QPS/0428</a> | Functional status change for patients with General orthopaedic impairments | All patients 14 years and older with general orthopaedic impairments who have initiated rehabilitation treatment and completed the FOTO (general orthopaedic) PROM. | <p>Patient Level: The residual functional status score for the individual patient (residual scores are the actual change scores - predicted change after risk adjustment).</p> <p>Individual Clinician Level: The average of residuals in functional status scores in patients who were treated by a clinician in a 12 month time period for general orthopaedic impairment.</p> <p>Clinic Level: The average of residuals in functional status scores in patients who were treated by a clinic in a 12 month time period for general orthopaedic impairment.</p> | Rate of change in functional status in patients older than 14 years with general orthopedic disability who have started rehabilitation treatment in which functional status was scored at the beginning and at the end of treatment. | 5 | Outcome | Musculoskeletal CC | Inpatient and ambulatory care | Effectiveness |
| 166 NQF | <a href="http://www.qualityforum.org/QPS/0423">http://www.qualityforum.org/QPS/0423</a> | Functional status change for patients with Hip impairments                 | All patients 14 years and older with hip impairments who have initiated rehabilitation treatment and complete the FOTO hip FS PROM at admission and discharge.      | <p>Patient Level: The residual functional status score for the individual patient (residual scores are the actual change scores - predicted change after risk adjustment).</p> <p>Individual Clinician Level: The average residuals in functional status scores in patients who were treated by a clinician in a 12 month time period for hip impairment.</p> <p>Clinic Level: The average residuals in functional status scores in patients who were treated by a clinic in a 12 month time period for hip impairment.</p>                                       | Rate of change in functional status in patients over 14 years of age with hip disability who have started rehabilitation treatment in which functional status was scored at the beginning and at the end of treatment.               | 5 | Outcome | Musculoskeletal CC | Inpatient and ambulatory care | Effectiveness |



|         |                                                                                         |                                                               |                                                                                                                                                                   |                                                                                                                                                                                                                                                                                                                                                                                                                                                                                                                                           |                                                                                                                                                                                                                           |   |         |                    |                               |               |
|---------|-----------------------------------------------------------------------------------------|---------------------------------------------------------------|-------------------------------------------------------------------------------------------------------------------------------------------------------------------|-------------------------------------------------------------------------------------------------------------------------------------------------------------------------------------------------------------------------------------------------------------------------------------------------------------------------------------------------------------------------------------------------------------------------------------------------------------------------------------------------------------------------------------------|---------------------------------------------------------------------------------------------------------------------------------------------------------------------------------------------------------------------------|---|---------|--------------------|-------------------------------|---------------|
| 167 NQF | <a href="http://www.qualityforum.org/QPS/0422">http://www.qualityforum.org/QPS/0422</a> | Functional status change for patients with Knee impairments   | All patients 14 years and older with knee impairments who have initiated rehabilitation treatment and completed the FOTO knee FS PROM at admission and discharge. | <p>Patient Level: The residual functional status score for the individual patient (residual scores are the actual change scores - predicted change after risk adjustment).</p> <p>Individual Clinician Level: The average of residuals in functional status scores in patients who were treated by a clinician in a 12 month time period for knee impairment.</p> <p>Clinic Level: The average of residuals in functional status scores in patients who were treated by a clinic in a 12 month time period for knee impairment.</p>       | Rate of change in functional status in patients over 14 years of age with knee disability who have started rehabilitation treatment in which functional status was scored at the beginning and at the end of treatment.   | 5 | Outcome | Musculoskeletal CC | Inpatient and ambulatory care | Effectiveness |
| 168 NQF | <a href="http://www.qualityforum.org/QPS/0425">http://www.qualityforum.org/QPS/0425</a> | Functional status change for patients with lumbar impairments | All patients 14 years and older with a lumbar impairment who have initiated rehabilitation treatment and completed the FOTO (lumbar) PROM.                        | <p>Patient Level: The residual functional status score for the individual patient (residual scores are the actual change scores - predicted change after risk adjustment).</p> <p>Individual Clinician Level: The average of residuals in functional status scores in patients who were treated by a clinician in a 12 month time period for lumbar impairment.</p> <p>Clinic Level: The average of residuals ) in functional status scores in patients who were treated by a clinic in a 12 month time period for lumbar impairment.</p> | Rate of change in functional status in patients over 14 years of age with lumbar disability who have started rehabilitation treatment in which functional status was scored at the beginning and at the end of treatment. | 5 | Outcome | Musculoskeletal CC | Inpatient and ambulatory care | Effectiveness |

|         |                                                                                         |                                                                                           |                                                                                                                                                                                              |                                                                                                                                                                                                                                                                                                                                                                                                                                                                                                                                     |                                                                                                                                                                                                                                                                                                                                                                                     |   |         |                    |                               |               |
|---------|-----------------------------------------------------------------------------------------|-------------------------------------------------------------------------------------------|----------------------------------------------------------------------------------------------------------------------------------------------------------------------------------------------|-------------------------------------------------------------------------------------------------------------------------------------------------------------------------------------------------------------------------------------------------------------------------------------------------------------------------------------------------------------------------------------------------------------------------------------------------------------------------------------------------------------------------------------|-------------------------------------------------------------------------------------------------------------------------------------------------------------------------------------------------------------------------------------------------------------------------------------------------------------------------------------------------------------------------------------|---|---------|--------------------|-------------------------------|---------------|
| 169 NQF | <a href="http://www.qualityforum.org/QPS/0426">http://www.qualityforum.org/QPS/0426</a> | Functional status change for patients with Shoulder impairments                           | All patients 14 years and older with shoulder impairments who have initiated rehabilitation treatment and completed the FOTO shoulder FS outcome instrument at admission and discharge.      | Patient Level: The residual functional status score for the individual patient (residual scores are the actual change scores - predicted change after risk adjustment.<br><br>Individual Clinician Level: The average of residuals in functional status scores in patients who were treated by a clinician in a 12 month time period for shoulder impairment.<br><br>Clinic Level: The average of residuals in functional status scores in patients who were treated by a clinic in a 12 month time period for shoulder impairment. | Rate of change in functional status in patients over 14 years of age with shoulder disability who have started rehabilitation treatment and who have completed a functional status assessment at the beginning and at the end of treatment.                                                                                                                                         | 5 | Outcome | Musculoskeletal CC | Inpatient and ambulatory care | Effectiveness |
| 170 NQF | <a href="http://www.qualityforum.org/QPS/0700">http://www.qualityforum.org/QPS/0700</a> | Health-related Quality of Life in COPD patients before and after Pulmonary Rehabilitation | All patients with clinician diagnosed COPD at PR program entry who completed one of the 3 valid and reliable HRQoL instruments at the beginning and end of PR during the measurement period. | Number of patients with clinician diagnosed COPD who have participated in PR and have been found to improve their HRQOL score by the minimum clinical important difference (MCID) as measured by the Chronic Respiratory Disease Questionnaire (CRQ), St. George's Respiratory Questionnaire (SGRQ), or the COPD Assessment Test (CAT) at the beginning and the end of PR.                                                                                                                                                          | Percentage of patients diagnosed with chronic obstructive pulmonary disease (COPD) who have completed a pulmonary rehabilitation program and completed the Chronic Respiratory Disease Questionnaire (CRQ), St. George's Respiratory Questionnaire (SGRQ), or COPD Assessment Test (CAT) in whom has found an improvement greater than the clinically important minimum difference. | 5 | Outcome | Pneumology CC      | Ambulatory care               | Effectiveness |

|         |                                                                                         |                                                                                                                                   |                                                                                                                                                        |                                                                                                                                                                                                                                                                                                                                                                                                                 |                                                                                                                                                                |         |                 |                |                       |
|---------|-----------------------------------------------------------------------------------------|-----------------------------------------------------------------------------------------------------------------------------------|--------------------------------------------------------------------------------------------------------------------------------------------------------|-----------------------------------------------------------------------------------------------------------------------------------------------------------------------------------------------------------------------------------------------------------------------------------------------------------------------------------------------------------------------------------------------------------------|----------------------------------------------------------------------------------------------------------------------------------------------------------------|---------|-----------------|----------------|-----------------------|
| 171 NQF | <a href="http://www.qualityforum.org/QPS/2634">http://www.qualityforum.org/QPS/2634</a> | Inpatient Rehabilitation Facility (IRF) Functional Outcome Measure: Change in Mobility Score for Medical Rehabilitation Patients  | The denominator is the number of Inpatient Rehabilitation Facility Medicare Part A and C patient stays, except those that meet the exclusion criteria. | The measure does not have a simple form for the numerator and denominator. This measure estimates the risk-adjusted change in mobility score between admission and discharge among Inpatient Rehabilitation Facility (IRF) Medicare Part A and C patients age 21 and older. The change in mobility score is calculated as the difference between the discharge mobility score and the admission mobility score. | Adjusted rate of change in 2 admission-discharge mobility score in patients over 21 years hospitalized with physical therapy treatment.                        | Outcome | all patients CC | Inpatient care | Effectiveness         |
| 172 NQF | <a href="http://www.qualityforum.org/QPS/2633">http://www.qualityforum.org/QPS/2633</a> | Inpatient Rehabilitation Facility (IRF) Functional Outcome Measure: Change in Self-Care Score for Medical Rehabilitation Patients | The denominator is the number of Inpatient Rehabilitation Facility Medicare patient stays, except those that meet the exclusion criteria.              | The measure does not have a simple form for the numerator and denominator. This measure estimates the risk-adjusted change in self-care score between admission and discharge among Inpatient Rehabilitation Facility (IRF) Medicare patients age 21 or older. The change in self-care score is calculated as the difference between the discharge self-care score and the admission self-care score.           | Adjusted rate of change in 2 admission-discharge self-care score in patients over 21 years hospitalized with physical therapy treatment.                       | Outcome | all patients CC | Inpatient care | Patient-centered care |
| 173 NQF | <a href="http://www.qualityforum.org/QPS/2636">http://www.qualityforum.org/QPS/2636</a> | Inpatient Rehabilitation Facility (IRF) Functional Outcome Measure: Discharge Mobility Score for Medical Rehabilitation Patients  | IRF patients included in this measure are at least 21 years of age, Medicare Part A and C beneficiaries, and have complete stays.                      | The numerator is the number of patients in an IRF with an observed discharge mobility score that is equal to or higher than a calculated expected discharge mobility score.                                                                                                                                                                                                                                     | Observed versus expected 2 ratio of change in admission-discharge mobility score in patients older than 21 years hospitalized with physical therapy treatment. | Outcome | all patients CC | Inpatient care | Effectiveness         |

|         |                                                                                         |                                                                                                                                   |                                                                                                                                                                 |                                                                                                                                                                                 |                                                                                                                                                         |   |         |                 |                               |                       |
|---------|-----------------------------------------------------------------------------------------|-----------------------------------------------------------------------------------------------------------------------------------|-----------------------------------------------------------------------------------------------------------------------------------------------------------------|---------------------------------------------------------------------------------------------------------------------------------------------------------------------------------|---------------------------------------------------------------------------------------------------------------------------------------------------------|---|---------|-----------------|-------------------------------|-----------------------|
| 174 NQF | <a href="http://www.qualityforum.org/QPS/2635">http://www.qualityforum.org/QPS/2635</a> | Inpatient Rehabilitation Facility (IRF) Functional Outcome Measure: Discharge Self-Care Score for Medical Rehabilitation Patients | Inpatient Rehabilitation Facility patients included in this measure are at least 21 years of age, Medicare Part A and C beneficiaries, and have complete stays. | The numerator is the number of patients in an IRF with an observed discharge self-care score that is equal to or higher than the calculated expected discharge self-care score. | Observed versus expected ratio of change in admission-discharge self-care score in patients over 21 years hospitalized with physical therapy treatment. | 2 | Outcome | all patients CC | Inpatient care                | Patient-centered care |
| 175 NQF | <a href="http://www.qualityforum.org/QPS/0141">http://www.qualityforum.org/QPS/0141</a> | Patient Fall Rate                                                                                                                 | Denominator Statement: Patient days by hospital unit during the calendar month times 1000.                                                                      | Total number of patient falls (with or without injury to the patient and whether or not assisted by a staff member) by hospital unit during the calendar month X 1000.          | Rate of fallen patients, with or without injury or assistance, per 1000 days/patient.                                                                   | 3 | Outcome | all patients CC | Inpatient and ambulatory care | Safety                |

|         |                                                                                                                                                 |                                                               |                                                                                                                                                                                                                                                                                                                                                                                                                                                                                                    |                                                                                                                                                                                                                                                                                                                                                                                                                                                                                                                                                                                                                                                                                                                                                                                    |                                                                                                                                                                                               |   |         |                  |                               |                       |
|---------|-------------------------------------------------------------------------------------------------------------------------------------------------|---------------------------------------------------------------|----------------------------------------------------------------------------------------------------------------------------------------------------------------------------------------------------------------------------------------------------------------------------------------------------------------------------------------------------------------------------------------------------------------------------------------------------------------------------------------------------|------------------------------------------------------------------------------------------------------------------------------------------------------------------------------------------------------------------------------------------------------------------------------------------------------------------------------------------------------------------------------------------------------------------------------------------------------------------------------------------------------------------------------------------------------------------------------------------------------------------------------------------------------------------------------------------------------------------------------------------------------------------------------------|-----------------------------------------------------------------------------------------------------------------------------------------------------------------------------------------------|---|---------|------------------|-------------------------------|-----------------------|
| 176 CMS | <a href="https://cmit.cms.gov/CMIT_public/ViewMeasure?MeasureId=515#tab1">https://cmit.cms.gov/CMIT_public/ViewMeasure?MeasureId=515#tab1</a>   | Screening for Depression and Follow-Up Plan: Age 18 and Older | The denominator for this measure includes Medicaid beneficiaries age 18 and older with an outpatient visit during the measurement year. The numerator for this measure includes the following two groups: 1. Those beneficiaries with a positive screen for clinical depression during an outpatient visit using a standardized tool with a follow-up plan documented. 2. Those beneficiaries with a negative screen for clinical depression during an outpatient visit using a standardized tool. | Patient's screening for clinical depression using an age appropriate standardized tool AND follow-up plan is documented. The standardized screening tools help predict a likelihood of someone developing or having a particular disease. The screening tools suggested in this measure screen for possible depression. Questions within the suggested standardized screening tools may vary but the result of using a standardized screening tool is to determine if the patient screens positive or negative for depression. If the patient has a positive screen for depression using a standardized screening tool, the provider must have a follow-up plan as defined within the measure. If the patient has a negative screen for depression, no follow-up plan is required. | Percentage of patients over 18 years of age with an outpatient visit who are screened for depression using a validated tool. (Includes making a follow-up plan in case of positive screening) | 5 | Process | Mental Health CC | Ambulatory care               | Patient-centered care |
| 177 CMS | <a href="https://cmit.cms.gov/CMIT_public/ViewMeasure?MeasureId=1247#tab1">https://cmit.cms.gov/CMIT_public/ViewMeasure?MeasureId=1247#tab1</a> | Falls: Screening for Future Fall Risk                         | Patients aged 65 years and older with a visit during the measurement period                                                                                                                                                                                                                                                                                                                                                                                                                        | Patients who were screened for future fall risk at least once within the measurement period                                                                                                                                                                                                                                                                                                                                                                                                                                                                                                                                                                                                                                                                                        | Percentage of elderly (> 65 years) in whom a risk assessment of future falls has been carried out.                                                                                            | 5 | Process | Geriatric CC     | Inpatient and ambulatory care | Safety                |

178 NICE indicator  
menu

<https://www.nice.org.uk/Media/Default/Standards-and-indicators/CCGOIS%20Indicators%20Key%20Documents/ccg22-hipfracture-2016-for-web.pdf>

Indicator CCG22: The proportion of people with hip fracture, who receive a multifactorial risk assessment of future falls risk

The number of people on the National Hip Fracture Database.

The number in the denominator who have received a multifactorial risk assessment from the hipfracture programme team.

Percentage of hip fracture 2 patients who have received a multifactorial assessment of the risk of future falls.

Process

Musculoskeletal CC

Inpatient and ambulatory care

Safety
